# Supplementary material for: Factors associated with birth preparedness and complication readiness in Southern Ethiopia: a community based cross-sectional study
Source: BMC Pregnancy Childbirth. 2017 Dec 8;17:412. doi: 10.1186/s12884-017-1582-3 (PMC5721538; doi:10.1186/s12884-017-1582-3)
Supplement: Additional file 1: — Raw data: It is an Excel data with the file name “revised additional file 1” which contains the raw data supporting the findings of this study. (XLS 1266 kb) [file 12884_2017_1582_MOESM1_ESM.xls]

## Sheet: additional file
relig	marst	livpar	ocupp	educst	incbirr	reanews	freqnews	listredio	freqredio	everpreg	agepreg	numpreg	currpreg	parity	hisofabort	hisofstill	placebirth	reas11	reas12	reas13	reas14	reas15	reas16	reas17	reas18	reas21	reas22	reas23	reas24	reas25	reas26	reas27	birthattend	ANCheard	ANCseen	freqANC	reasANC1	reasANC2	reasANC3	reasANC4	reasANC5	adviceAN	advANC1	advANC2	advANC3	advANC4	advANC5	advANC6	dagrsign
1	1	1	5	5	2197	1	3	0	#NULL!	1	1	2	1	1	0	0	2	#NULL!	#NULL!	#NULL!	#NULL!	#NULL!	#NULL!	#NULL!		2	1	2	2	2	2		3	1	1	1	2	2	1	2	#NULL!	1	2	2	1	2	2		1
1	1	1	2	1	6000	0	#NULL!	0	#NULL!	1	0	3	1	2	0	0	1	1	2	2	2	2	2	2		#NULL!	#NULL!	#NULL!	#NULL!	#NULL!	#NULL!		1	1	1	1	2	1	2	2	#NULL!	1	1	1	1	1	2		1
1	2	2	1	2	3200	0	#NULL!	0	#NULL!	1	0	1	1	1	#NULL!	0	#NULL!	#NULL!	#NULL!	#NULL!	#NULL!	#NULL!	#NULL!	#NULL!		#NULL!	#NULL!	#NULL!	#NULL!	#NULL!	#NULL!		#NULL!	1	1	2	2	1	1	2	#NULL!	2	#NULL!	#NULL!	#NULL!	#NULL!	#NULL!		1
1	1	1	2	2	6000	0	#NULL!	0	#NULL!	1	0	1	1	#NULL!	#NULL!	#NULL!	#NULL!	#NULL!	#NULL!	#NULL!	#NULL!	#NULL!	#NULL!	#NULL!		#NULL!	#NULL!	#NULL!	#NULL!	#NULL!	#NULL!		#NULL!	1	0	#NULL!	#NULL!	#NULL!	#NULL!	#NULL!	#NULL!	#NULL!	#NULL!	#NULL!	#NULL!	#NULL!	#NULL!		1
1	1	1	2	1	5000	0	#NULL!	0	#NULL!	1	0	2	1	2	0	0	1	1	2	2	2	2	2	2		#NULL!	#NULL!	#NULL!	#NULL!	#NULL!	#NULL!		1	1	1	2	2	1	2	2	#NULL!	1	1	1	0	1	2	vaccination	1
1	1	1	2	1	4000	0	#NULL!	0	#NULL!	1	1	2	1	2	0	0	2	#NULL!	#NULL!	#NULL!	#NULL!	#NULL!	#NULL!	#NULL!		2	1	1	2	2	1		3	1	1	2	1	1	2	1	#NULL!	1	1	1	1	1	2		1
1	1	1	2	1	3000	0	#NULL!	0	#NULL!	1	0	3	1	3	0	0	1	1	2	2	2	2	2	2		#NULL!	#NULL!	#NULL!	#NULL!	#NULL!	#NULL!		1	1	1	3	1	2	1	1	#NULL!	1	1	1	0	1	2	do not lift heavy ma	1
1	1	1	2	1	800	0	#NULL!	0	#NULL!	1	0	3	1	2	0	0	2	#NULL!	#NULL!	#NULL!	#NULL!	#NULL!	#NULL!	#NULL!		1	2	1	2	2	2		2	1	1	3	1	2	1	1	#NULL!	2	#NULL!	#NULL!	#NULL!	#NULL!	#NULL!		1
1	1	1	2	3	2400	0	#NULL!	0	#NULL!	1	0	3	1	2	0	0	1	1	2	2	1	2	2	2		#NULL!	#NULL!	#NULL!	#NULL!	#NULL!	#NULL!		1	1	1	1	1	2	1	2	#NULL!	1	1	1	1	2	2		2
1	1	1	2	1	1100	0	#NULL!	0	#NULL!	1	0	3	1	3	1	0	1	#NULL!	1	2	1	2	2	2		#NULL!	#NULL!	#NULL!	#NULL!	#NULL!	#NULL!		1	1	1	1	2	2	1	2	#NULL!	2	#NULL!	#NULL!	#NULL!	#NULL!	#NULL!		1
1	1	1	1	2	0	0	#NULL!	0	#NULL!	1	1	3	1	2	0	0	2	#NULL!	#NULL!	#NULL!	#NULL!	#NULL!	#NULL!	#NULL!		2	1	1	2	2	2		3	1	1	2	2	1	1	2	#NULL!	1	1	1	0	2	2		1
1	1	1	2	2	0	0	#NULL!	0	#NULL!	1	1	2	1	2	0	0	2	#NULL!	#NULL!	#NULL!	#NULL!	#NULL!	#NULL!	#NULL!		2	1	1	2	1	2		2	1	1	3	2	2	1	2	#NULL!	1	1	1	1	1	2		1
1	1	1	2	1	1500	0	#NULL!	0	#NULL!	1	1	2	1	1	0	0	1	2	1	2	1	2	2	2		#NULL!	#NULL!	#NULL!	#NULL!	#NULL!	#NULL!		1	2	#NULL!	#NULL!	#NULL!	#NULL!	#NULL!	#NULL!	#NULL!	#NULL!	#NULL!	#NULL!	#NULL!	#NULL!	#NULL!		1
1	1	1	2	4	2000	0	#NULL!	1	1	1	1	3	1	1	1	0	1	1	1	2	1	1	1	2		#NULL!	#NULL!	#NULL!	#NULL!	#NULL!	#NULL!		1	1	1	2	2	1	1	2	#NULL!	1	2	1	1	2	2	HIV test	1
2	1	1	2	5	1200	0	#NULL!	1	1	1	1	1	1	#NULL!	#NULL!	#NULL!	#NULL!	#NULL!	#NULL!	#NULL!	#NULL!	#NULL!	#NULL!	#NULL!		#NULL!	#NULL!	#NULL!	#NULL!	#NULL!	#NULL!		#NULL!	1	1	2	1	1	1	2	#NULL!	1	1	1	1	2	1		1
2	1	1	2	5	1900	1	2	1	3	1	0	1	1	#NULL!	#NULL!	#NULL!	#NULL!	#NULL!	#NULL!	#NULL!	#NULL!	#NULL!	#NULL!	#NULL!		#NULL!	#NULL!	#NULL!	#NULL!	#NULL!	#NULL!		#NULL!	1	1	2	2	1	1	2	#NULL!	1	1	1	1	2	2		1
2	2	2	2	3	2650	0	#NULL!	1	2	1	1	3	1	2	0	1	2	#NULL!	#NULL!	#NULL!	#NULL!	#NULL!	#NULL!	#NULL!		2	2	2	1	2	2		2	1	1	2	2	1	1	2	#NULL!	1	2	2	1	2	2		1
1	1	1	1	1	1200	0	#NULL!	0	#NULL!	1	1	3	1	2	0	0	2	#NULL!	#NULL!	#NULL!	#NULL!	#NULL!	#NULL!	#NULL!		2	1	1	2	2	2		3	1	1	3	1	1	1	1	#NULL!	1	1	1	1	2	1		1
1	1	1	2	3	2150	0	#NULL!	0	#NULL!	1	0	2	1	1	0	0	1	2	2	2	2	1	2	2		#NULL!	#NULL!	#NULL!	#NULL!	#NULL!	#NULL!		1	1	1	2	1	1	1	1	#NULL!	1	2	1	1	2	2		1
1	1	1	2	5	900	1	2	1	2	1	1	1	1	1	#NULL!	0	2	#NULL!	#NULL!	#NULL!	#NULL!	#NULL!	#NULL!	#NULL!		2	1	2	2	1	1		3	1	1	3	1	1	1	1	#NULL!	1	2	2	1	2	1		1
2	1	1	2	3	1450	0	#NULL!	0	#NULL!	1	1	2	1	1	0	0	2	#NULL!	#NULL!	#NULL!	#NULL!	#NULL!	#NULL!	#NULL!		2	1	1	2	1	2		3	1	1	2	2	1	1	2	#NULL!	1	1	1	1	2	2		1
1	1	1	2	3	1500	0	#NULL!	0	#NULL!	1	1	2	1	#NULL!	1	0	#NULL!	#NULL!	#NULL!	#NULL!	#NULL!	#NULL!	#NULL!	#NULL!		#NULL!	#NULL!	#NULL!	#NULL!	#NULL!	#NULL!		#NULL!	1	1	3	1	1	1	2	#NULL!	1	1	1	1	2	1		1
1	1	1	2	1	400	0	#NULL!	0	#NULL!	2	1	2	1	2	0	0	2	#NULL!	#NULL!	#NULL!	#NULL!	#NULL!	#NULL!	#NULL!		2	1	1	2	2	2		3	1	1	2	2	2	1	2	#NULL!	1	1	1	1	2	2		1
2	1	1	2	3	333	0	#NULL!	0	#NULL!	1	0	2	1	#NULL!	1	0	2	#NULL!	#NULL!	#NULL!	#NULL!	#NULL!	#NULL!	#NULL!		1	2	2	2	2	2		3	1	1	1	1	2	#NULL!	2	#NULL!	1	1	1	1	2	2		1
1	1	1	2	3	200	1	2	1	1	1	0	2	1	2	0	0	1	1	1	2	2	2	2	2		#NULL!	#NULL!	#NULL!	#NULL!	#NULL!	#NULL!		1	1	1	1	1	2	1	2	#NULL!	1	1	2	1	2	2		2
2	1	1	1	4	400	1	3	1	2	1	1	2	1	1	0	0	2	#NULL!	#NULL!	#NULL!	#NULL!	#NULL!	#NULL!	#NULL!		2	2	1	2	2	2		3	1	1	2	1	2	2	2	#NULL!	1	2	1	0	1	2		2
1	1	1	2	4	775	1	2	1	1	1	1	3	1	2	0	0	2	#NULL!	#NULL!	#NULL!	#NULL!	#NULL!	#NULL!	#NULL!		2	2	2	2	2	2	free service	3	1	1	2	1	1	1	2	#NULL!	1	2	1	0	1	2	iron use/HIV test	1
1	1	1	2	3	0	0	#NULL!	0	#NULL!	1	1	3	1	2	0	0	2	#NULL!	#NULL!	#NULL!	#NULL!	#NULL!	#NULL!	#NULL!		2	1	2	1	2	1		3	1	1	1	1	2	1	2	#NULL!	1	1	2	1	1	2		1
1	1	1	2	1	800	0	#NULL!	0	#NULL!	1	1	3	1	2	0	0	1	1	2	2	2	2	2	2		#NULL!	#NULL!	#NULL!	#NULL!	#NULL!	#NULL!		1	1	1	1	1	2	2	2	#NULL!	1	1	2	0	1	2		2
1	1	1	2	4	0	1	2	1	1	1	1	1	1	#NULL!	#NULL!	#NULL!	#NULL!	#NULL!	#NULL!	#NULL!	#NULL!	#NULL!	#NULL!	#NULL!		#NULL!	#NULL!	#NULL!	#NULL!	#NULL!	#NULL!		#NULL!	1	1	1	1	2	2	1	#NULL!	1	1	2	1	2	2		1
1	1	1	2	3	0	0	#NULL!	1	2	1	1	3	1	2	0	0	1	1	2	2	2	2	2	2		#NULL!	#NULL!	#NULL!	#NULL!	#NULL!	#NULL!		1	1	1	1	1	1	1	2	#NULL!	1	1	1	1	1	2		1
2	1	1	2	3	0	0	#NULL!	0	#NULL!	1	0	1	1	2	#NULL!	#NULL!	#NULL!	#NULL!	#NULL!	#NULL!	#NULL!	#NULL!	#NULL!	#NULL!		#NULL!	#NULL!	#NULL!	#NULL!	#NULL!	#NULL!		#NULL!	1	1	2	1	2	2	2	#NULL!	1	1	1	0	1	2		2
1	1	1	2	3	333	0	#NULL!	0	#NULL!	1	1	9	1	2	1	0	1	1	1	2	2	2	2	2		#NULL!	#NULL!	#NULL!	#NULL!	#NULL!	#NULL!		1	1	1	3	1	1	1	1	#NULL!	1	1	1	0	1	2		1
1	1	1	2	3	780	1	3	1	2	1	1	3	1	2	0	0	2	#NULL!	#NULL!	#NULL!	#NULL!	#NULL!	#NULL!	#NULL!		2	2	1	2	1	2		3	1	1	1	2	1	2	2	#NULL!	2	#NULL!	#NULL!	#NULL!	#NULL!	#NULL!		1
1	1	1	2	4	500	0	#NULL!	0	#NULL!	1	0	1	1	#NULL!	#NULL!	#NULL!	#NULL!	#NULL!	#NULL!	#NULL!	#NULL!	#NULL!	#NULL!	#NULL!		#NULL!	#NULL!	#NULL!	#NULL!	#NULL!	#NULL!		#NULL!	1	1	1	2	2	2	2	#NULL!	1	2	2	0	2	2		1
1	1	1	1	3	300	0	#NULL!	0	#NULL!	1	0	3	1	2	0	0	1	1	2	1	1	2	2	2		#NULL!	#NULL!	#NULL!	#NULL!	#NULL!	#NULL!		1	1	1	1	1	1	1	1	#NULL!	1	1	2	1	1	2		2
1	1	1	1	1	0	0	#NULL!	0	#NULL!	1	1	3	1	2	0	0	2	#NULL!	#NULL!	#NULL!	#NULL!	#NULL!	#NULL!	#NULL!		1	2	2	2	1	2		3	1	1	1	1	1	1	2	#NULL!	1	1	2	1	1	2		1
1	1	1	1	3	300	0	#NULL!	0	#NULL!	1	1	2	1	2	0	0	2	#NULL!	#NULL!	#NULL!	#NULL!	#NULL!	#NULL!	#NULL!		1	2	1	2	1	2		2	1	1	2	1	2	1	2	#NULL!	1	1	1	1	1	1		1
2	1	1	1	3	400	0	#NULL!	0	#NULL!	1	1	2	1	2	0	0	2	#NULL!	#NULL!	#NULL!	#NULL!	#NULL!	#NULL!	#NULL!		1	2	1	2	1	2		1	1	1	1	1	1	1	2	#NULL!	1	1	2	1	2	2		2
1	1	1	1	2	0	0	#NULL!	0	#NULL!	1	1	2	1	1	0	0	2	#NULL!	#NULL!	#NULL!	#NULL!	#NULL!	#NULL!	#NULL!		2	1	1	2	1	2		3	1	1	3	2	1	2	1	#NULL!	1	1	1	1	2	2		1
1	1	1	1	2	475	0	#NULL!	0	#NULL!	1	1	2	1	#NULL!	1	0	#NULL!	#NULL!	#NULL!	#NULL!	#NULL!	#NULL!	#NULL!	#NULL!		#NULL!	#NULL!	#NULL!	#NULL!	#NULL!	#NULL!		1	1	1	2	1	2	1	2	#NULL!	1	1	1	1	2	2		1
1	1	1	1	1	950	0	#NULL!	0	#NULL!	1	1	2	1	1	0	0	2	#NULL!	#NULL!	#NULL!	#NULL!	#NULL!	#NULL!	#NULL!		2	1	1	2	2	2		3	1	1	3	2	2	1	2	#NULL!	1	1	1	1	2	2		1
1	1	1	1	1	1200	0	#NULL!	0	#NULL!	1	1	3	1	2	0	0	2	#NULL!	#NULL!	#NULL!	#NULL!	#NULL!	#NULL!	#NULL!		2	1	1	2	1	2		3	1	1	3	2	1	1	2	#NULL!	1	1	1	1	2	2		1
1	1	1	6	4	800	1	2	0	#NULL!	1	1	3	1	1	0	1	1	1	2	2	1	2	2	2		#NULL!	#NULL!	#NULL!	#NULL!	#NULL!	#NULL!		1	1	1	1	2	1	1	2	#NULL!	1	1	1	1	2	2		1
1	1	1	1	3	600	0	#NULL!	0	#NULL!	1	1	3	1	2	0	0	2	#NULL!	#NULL!	#NULL!	#NULL!	#NULL!	#NULL!	#NULL!		2	1	1	2	1	2		3	1	1	3	2	2	1	2	#NULL!	1	1	1	1	2	1		1
1	1	1	1	2	850	0	#NULL!	0	#NULL!	1	1	3	1	2	0	0	2	#NULL!	#NULL!	#NULL!	#NULL!	#NULL!	#NULL!	#NULL!		2	1	1	1	2	2		3	1	1	3	2	2	1	2	#NULL!	1	1	1	1	2	2		1
1	1	1	1	1	450	0	#NULL!	0	#NULL!	1	1	3	1	1	0	0	2	#NULL!	#NULL!	#NULL!	#NULL!	#NULL!	#NULL!	#NULL!		1	2	2	2	2	2		2	2	#NULL!	#NULL!	#NULL!	#NULL!	#NULL!	#NULL!	#NULL!	#NULL!	#NULL!	#NULL!	#NULL!	#NULL!	#NULL!		2
1	1	1	1	2	800	0	#NULL!	0	#NULL!	1	1	2	1	1	0	0	2	#NULL!	#NULL!	#NULL!	#NULL!	#NULL!	#NULL!	#NULL!		2	1	1	2	1	2		3	1	1	2	2	1	1	2	#NULL!	1	1	1	1	2	2		1
1	1	1	1	1	1100	0	#NULL!	0	#NULL!	1	1	3	1	2	0	0	2	#NULL!	#NULL!	#NULL!	#NULL!	#NULL!	#NULL!	#NULL!		2	1	1	2	1	2		1	1	1	3	2	1	1	2	#NULL!	1	1	1	0	2	2		1
1	1	1	2	2	1300	0	#NULL!	0	#NULL!	1	0	2	1	1	0	0	1	1	2	2	2	2	2	2		#NULL!	#NULL!	#NULL!	#NULL!	#NULL!	#NULL!		1	1	1	3	2	1	1	2	#NULL!	1	1	1	0	2	2		1
1	1	1	1	3	800	0	#NULL!	0	#NULL!	1	1	3	1	2	0	1	1	2	1	2	1	2	2	2		#NULL!	#NULL!	#NULL!	#NULL!	#NULL!	#NULL!		1	1	1	2	2	1	1	2	#NULL!	1	1	1	1	2	2		1
1	1	1	2	2	600	0	#NULL!	1	2	1	1	2	1	1	0	0	2	#NULL!	#NULL!	#NULL!	#NULL!	#NULL!	#NULL!	#NULL!		2	1	1	2	2	2		3	1	1	2	2	1	1	2	#NULL!	1	1	1	1	2	2		1
2	1	1	1	3	1400	0	#NULL!	1	1	1	1	3	1	2	0	0	2	#NULL!	#NULL!	#NULL!	#NULL!	#NULL!	#NULL!	#NULL!		2	1	1	2	2	2		2	1	1	1	2	1	1	2	#NULL!	1	1	1	1	2	2	HIV TEST	1
1	1	1	1	2	780	0	#NULL!	1	2	1	1	2	1	1	0	0	2	#NULL!	#NULL!	#NULL!	#NULL!	#NULL!	#NULL!	#NULL!		2	2	1	2	2	2		1	1	1	1	2	1	1	2	#NULL!	1	1	1	1	2	2		1
1	1	1	1	3	750	0	#NULL!	1	1	1	0	3	1	2	0	1	1	1	2	2	2	2	2	2		#NULL!	#NULL!	#NULL!	#NULL!	#NULL!	#NULL!		1	1	1	1	1	2	2	2	#NULL!	1	1	1	0	2	2		1
1	1	1	1	3	700	0	#NULL!	1	2	1	1	3	1	1	1	1	1	1	1	2	1	2	2	2		#NULL!	#NULL!	#NULL!	#NULL!	#NULL!	#NULL!		1	1	1	2	2	1	1	2	#NULL!	1	1	1	1	2	2		1
1	1	1	1	1	666	0	#NULL!	1	1	1	1	3	1	2	0	0	1	1	2	2	2	2	2	2		#NULL!	#NULL!	#NULL!	#NULL!	#NULL!	#NULL!		1	1	1	1	1	2	1	2	#NULL!	1	1	2	1	2	2		2
1	1	1	1	1	900	0	#NULL!	1	2	1	1	2	1	1	0	0	2	#NULL!	#NULL!	#NULL!	#NULL!	#NULL!	#NULL!	#NULL!		2	1	1	1	2	2		2	1	1	2	2	2	1	2	#NULL!	1	1	1	0	2	2		1
1	1	1	1	1	500	0	#NULL!	1	1	1	1	3	1	1	0	1	1	2	2	2	1	2	2	2		#NULL!	#NULL!	#NULL!	#NULL!	#NULL!	#NULL!		1	1	1	3	2	2	2	1	#NULL!	1	1	1	0	2	2		1
2	1	2	4	4	2000	1	2	1	1	1	1	1	1	#NULL!	#NULL!	#NULL!	#NULL!	#NULL!	#NULL!	#NULL!	#NULL!	#NULL!	#NULL!	#NULL!		#NULL!	#NULL!	#NULL!	#NULL!	#NULL!	#NULL!		#NULL!	1	1	2	2	2	1	2	#NULL!	1	2	1	0	2	2		1
1	1	1	6	4	750	1	1	1	1	1	1	1	1	#NULL!	#NULL!	#NULL!	#NULL!	#NULL!	#NULL!	#NULL!	#NULL!	#NULL!	#NULL!	#NULL!		#NULL!	#NULL!	#NULL!	#NULL!	#NULL!	#NULL!		#NULL!	1	1	1	1	2	1	2	#NULL!	1	1	2	1	1	2		2
1	1	2	1	1	500	0	#NULL!	1	2	1	1	3	1	1	1	0	1	1	2	2	1	2	2	2		#NULL!	#NULL!	#NULL!	#NULL!	#NULL!	#NULL!		1	1	1	2	2	2	2	1	#NULL!	1	1	1	1	2	2		1
2	1	1	1	3	700	0	#NULL!	1	2	1	1	2	1	1	0	0	1	1	2	2	1	2	2	2		#NULL!	#NULL!	#NULL!	#NULL!	#NULL!	#NULL!		1	1	1	2	2	1	1	2	#NULL!	1	1	1	1	2	1		1
1	1	1	1	5	600	0	#NULL!	1	1	1	1	3	1	1	0	1	1	1	1	2	1	2	2	2		#NULL!	#NULL!	#NULL!	#NULL!	#NULL!	#NULL!		1	1	1	2	2	1	1	2	#NULL!	1	2	2	0	2	2	NJV test	1
1	1	1	1	1	1350	0	#NULL!	1	1	1	0	1	1	#NULL!	#NULL!	#NULL!	#NULL!	#NULL!	#NULL!	#NULL!	#NULL!	#NULL!	#NULL!	#NULL!		#NULL!	#NULL!	#NULL!	#NULL!	#NULL!	#NULL!		#NULL!	1	1	2	2	2	1	2	#NULL!	1	2	1	0	2	2		1
2	1	1	1	4	980	0	#NULL!	1	2	1	0	3	1	1	1	0	1	1	1	2	1	2	2	2		#NULL!	#NULL!	#NULL!	#NULL!	#NULL!	#NULL!		1	1	1	3	2	1	1	2	#NULL!	1	1	1	1	2	2		1
1	1	1	1	4	700	0	#NULL!	1	1	1	0	2	1	1	#NULL!	#NULL!	1	1	2	2	1	2	2	2		#NULL!	#NULL!	#NULL!	#NULL!	#NULL!	#NULL!		1	1	1	2	2	1	1	2	#NULL!	1	1	1	1	2	2		1
2	1	1	1	1	600	0	#NULL!	1	1	1	1	2	1	1	0	0	1	1	1	1	1	2	2	2		#NULL!	#NULL!	#NULL!	#NULL!	#NULL!	#NULL!		1	1	1	3	2	2	1	2	#NULL!	1	1	1	0	2	2		1
1	1	1	1	1	400	0	#NULL!	1	2	1	1	3	1	2	0	0	1	1	2	1	1	2	2	2		#NULL!	#NULL!	#NULL!	#NULL!	#NULL!	#NULL!		1	1	1	1	2	2	1	2	#NULL!	1	1	2	1	2	2		2
2	1	1	1	3	800	0	#NULL!	1	2	1	0	3	1	2	0	0	2	#NULL!	#NULL!	#NULL!	#NULL!	#NULL!	#NULL!	#NULL!		2	1	1	2	2	2		3	1	1	2	2	1	1	2	#NULL!	1	1	1	0	2	2		1
1	1	1	1	4	650	0	#NULL!	1	2	1	1	3	1	2	1	1	1	1	1	2	1	2	2	2		#NULL!	#NULL!	#NULL!	#NULL!	#NULL!	#NULL!		1	1	1	3	2	2	1	2	#NULL!	1	1	1	1	2	2		1
2	1	1	1	4	800	1	2	1	1	1	0	1	1	#NULL!	#NULL!	#NULL!	#NULL!	#NULL!	#NULL!	#NULL!	#NULL!	#NULL!	#NULL!	#NULL!		#NULL!	#NULL!	#NULL!	#NULL!	#NULL!	#NULL!		#NULL!	1	0	#NULL!	#NULL!	#NULL!	#NULL!	#NULL!	#NULL!	#NULL!	#NULL!	#NULL!	#NULL!	#NULL!	#NULL!		1
1	1	1	1	1	700	0	#NULL!	1	2	1	0	1	1	#NULL!	#NULL!	#NULL!	#NULL!	#NULL!	#NULL!	#NULL!	#NULL!	#NULL!	#NULL!	#NULL!		#NULL!	#NULL!	#NULL!	#NULL!	#NULL!	#NULL!		#NULL!	2	#NULL!	#NULL!	#NULL!	#NULL!	#NULL!	#NULL!	#NULL!	#NULL!	#NULL!	#NULL!	#NULL!	#NULL!	#NULL!		1
2	1	1	1	1	900	0	#NULL!	1	2	1	1	2	1	1	0	0	1	1	1	2	1	2	2	2		#NULL!	#NULL!	#NULL!	#NULL!	#NULL!	#NULL!		1	1	1	2	2	1	1	2	#NULL!	1	1	1	1	2	2		1
2	1	1	1	1	500	0	#NULL!	0	#NULL!	1	1	3	1	2	1	1	1	1	2	2	1	2	2	2		#NULL!	#NULL!	#NULL!	#NULL!	#NULL!	#NULL!		1	1	1	2	1	2	2	1	#NULL!	1	1	1	1	2	1		2
1	1	1	1	1	1050	0	#NULL!	0	#NULL!	1	0	2	1	1	0	0	2	#NULL!	#NULL!	#NULL!	#NULL!	#NULL!	#NULL!	#NULL!		2	2	1	2	2	2		3	1	0	#NULL!	#NULL!	#NULL!	#NULL!	#NULL!	#NULL!	#NULL!	#NULL!	#NULL!	#NULL!	#NULL!	#NULL!		1
1	1	2	1	3	1000	0	#NULL!	1	1	1	0	3	1	2	0	0	2	#NULL!	#NULL!	#NULL!	#NULL!	#NULL!	#NULL!	#NULL!		1	2	2	2	2	2		3	2	#NULL!	#NULL!	#NULL!	#NULL!	#NULL!	#NULL!	#NULL!	#NULL!	#NULL!	#NULL!	#NULL!	#NULL!	#NULL!		2
1	1	1	1	3	1200	1	1	1	1	1	1	3	1	3	0	0	1	1	2	2	2	2	2	2		#NULL!	#NULL!	#NULL!	#NULL!	#NULL!	#NULL!		1	1	1	2	1	2	2	1	#NULL!	1	1	1	1	2	2		2
1	1	2	4	1	2000	0	#NULL!	1	1	1	1	2	1	1	0	0	1	1	2	2	1	2	2	2		#NULL!	#NULL!	#NULL!	#NULL!	#NULL!	#NULL!		1	1	0	#NULL!	#NULL!	#NULL!	#NULL!	#NULL!	#NULL!	#NULL!	#NULL!	#NULL!	#NULL!	#NULL!	#NULL!		2
1	1	1	1	2	600	0	#NULL!	0	#NULL!	1	0	3	1	2	0	0	1	2	2	1	1	2	2	2		#NULL!	#NULL!	#NULL!	#NULL!	#NULL!	#NULL!		1	1	0	#NULL!	#NULL!	#NULL!	#NULL!	#NULL!	#NULL!	#NULL!	#NULL!	#NULL!	#NULL!	#NULL!	#NULL!		2
3	1	2	1	1	800	0	#NULL!	1	1	1	0	3	1	2	0	0	1	1	2	2	1	2	1	2		#NULL!	#NULL!	#NULL!	#NULL!	#NULL!	#NULL!		1	2	#NULL!	#NULL!	#NULL!	#NULL!	#NULL!	#NULL!	#NULL!	#NULL!	#NULL!	#NULL!	#NULL!	#NULL!	#NULL!		1
1	1	1	1	3	3600	0	#NULL!	1	1	1	0	1	1	#NULL!	#NULL!	#NULL!	#NULL!	#NULL!	#NULL!	#NULL!	#NULL!	#NULL!	#NULL!	#NULL!		#NULL!	#NULL!	#NULL!	#NULL!	#NULL!	#NULL!		#NULL!	1	1	1	1	2	#NULL!	2	#NULL!	1	1	1	1	2	2		1
1	1	1	1	3	3600	0	#NULL!	1	1	1	0	1	1	#NULL!	#NULL!	#NULL!	#NULL!	#NULL!	#NULL!	#NULL!	#NULL!	#NULL!	#NULL!	#NULL!		#NULL!	#NULL!	#NULL!	#NULL!	#NULL!	#NULL!		#NULL!	1	0	#NULL!	#NULL!	#NULL!	#NULL!	#NULL!	#NULL!	#NULL!	#NULL!	#NULL!	#NULL!	#NULL!	#NULL!		1
3	2	2	5	3	0	0	#NULL!	0	#NULL!	1	1	3	1	2	1	0	1	1	2	2	1	2	2	2		#NULL!	#NULL!	#NULL!	#NULL!	#NULL!	#NULL!		1	2	#NULL!	#NULL!	#NULL!	#NULL!	#NULL!	#NULL!	#NULL!	#NULL!	#NULL!	#NULL!	#NULL!	#NULL!	#NULL!		2
1	3	2	6	3	1100	1	3	1	2	1	1	2	1	2	0	0	1	1	1	2	2	2	2	2		#NULL!	#NULL!	#NULL!	#NULL!	#NULL!	#NULL!		1	1	1	2	1	1	1	2	#NULL!	1	1	1	1	2	2		2
1	2	2	1	3	800	0	#NULL!	0	#NULL!	1	0	3	1	2	0	0	1	1	2	2	2	2	2	#NULL!		#NULL!	#NULL!	#NULL!	#NULL!	#NULL!	#NULL!		1	2	#NULL!	#NULL!	#NULL!	#NULL!	#NULL!	#NULL!	#NULL!	#NULL!	#NULL!	#NULL!	#NULL!	#NULL!	#NULL!		2
2	1	1	4	3	800	0	#NULL!	1	1	1	0	3	1	2	0	0	1	1	1	2	2	2	2	2		#NULL!	#NULL!	#NULL!	#NULL!	#NULL!	#NULL!		1	1	1	2	1	1	1	1	#NULL!	1	1	1	1	2	2		1
1	1	1	2	4	1350	0	1	1	3	1	1	1	1	#NULL!	#NULL!	#NULL!	#NULL!	#NULL!	#NULL!	#NULL!	#NULL!	#NULL!	#NULL!	#NULL!		#NULL!	#NULL!	#NULL!	#NULL!	#NULL!	#NULL!		#NULL!	1	1	2	1	1	1	1	#NULL!	1	1	1	1	2	2		2
2	4	2	1	3	1500	1	3	1	3	1	0	3	1	2	0	0	1	1	2	2	1	2	2	2		#NULL!	#NULL!	#NULL!	#NULL!	#NULL!	#NULL!		1	1	0	#NULL!	#NULL!	#NULL!	#NULL!	#NULL!	#NULL!	#NULL!	#NULL!	#NULL!	#NULL!	#NULL!	#NULL!		1
1	1	1	2	1	400	0	#NULL!	1	1	1	0	2	1	1	0	0	1	1	2	2	1	2	2	2		#NULL!	#NULL!	#NULL!	#NULL!	#NULL!	#NULL!		1	1	1	1	1	2	2	2	#NULL!	1	1	2	0	1	2		2
1	1	1	4	2	930	0	#NULL!	0	#NULL!	1	1	2	1	1	0	0	1	1	1	2	1	2	2	2		#NULL!	#NULL!	#NULL!	#NULL!	#NULL!	#NULL!		1	1	1	2	1	2	1	2	#NULL!	1	1	1	1	2	2		1
1	2	2	1	1	600	0	#NULL!	1	1	1	0	3	1	2	0	0	1	1	1	2	1	2	2	2		#NULL!	#NULL!	#NULL!	#NULL!	#NULL!	#NULL!		1	2	#NULL!	#NULL!	#NULL!	#NULL!	#NULL!	#NULL!	#NULL!	#NULL!	#NULL!	#NULL!	#NULL!	#NULL!	#NULL!		1
1	1	1	1	1	1500	1	#NULL!	1	1	1	0	3	1	2	0	1	1	1	2	2	1	2	2	1		#NULL!	#NULL!	#NULL!	#NULL!	#NULL!	#NULL!		1	2	#NULL!	#NULL!	#NULL!	#NULL!	#NULL!	#NULL!	#NULL!	#NULL!	#NULL!	#NULL!	#NULL!	#NULL!	#NULL!		2
1	3	2	1	1	1500	1	1	1	1	1	1	3	1	2	0	0	2	#NULL!	#NULL!	#NULL!	#NULL!	#NULL!	#NULL!	#NULL!		1	2	1	1	2	2		2	1	0	#NULL!	#NULL!	#NULL!	#NULL!	#NULL!	#NULL!	#NULL!	#NULL!	#NULL!	#NULL!	#NULL!	#NULL!		2
1	2	1	2	3	334	0	#NULL!	0	#NULL!	1	0	3	1	2	0	0	1	1	2	2	2	2	2	2	sudden delivery	1	#NULL!	#NULL!	#NULL!	#NULL!	#NULL!		1	1	0	#NULL!	#NULL!	#NULL!	#NULL!	#NULL!	#NULL!	#NULL!	#NULL!	#NULL!	#NULL!	#NULL!	#NULL!		2
1	1	1	1	5	1000	0	#NULL!	1	2	1	1	2	1	#NULL!	1	0	#NULL!	#NULL!	#NULL!	#NULL!	#NULL!	#NULL!	#NULL!	#NULL!		#NULL!	#NULL!	#NULL!	#NULL!	#NULL!	#NULL!		#NULL!	1	0	#NULL!	#NULL!	#NULL!	#NULL!	#NULL!	#NULL!	#NULL!	#NULL!	#NULL!	#NULL!	#NULL!	#NULL!		1
1	1	1	2	3	400	0	#NULL!	1	2	1	0	3	1	2	0	0	2	#NULL!	#NULL!	#NULL!	#NULL!	#NULL!	#NULL!	#NULL!		1	2	2	2	2	2		2	1	0	#NULL!	#NULL!	#NULL!	#NULL!	#NULL!	#NULL!	#NULL!	#NULL!	#NULL!	#NULL!	#NULL!	#NULL!		2
1	1	1	2	4	300	0	#NULL!	0	#NULL!	1	0	1	1	#NULL!	#NULL!	#NULL!	#NULL!	#NULL!	#NULL!	#NULL!	#NULL!	#NULL!	#NULL!	#NULL!		#NULL!	#NULL!	#NULL!	#NULL!	#NULL!	#NULL!		#NULL!	1	1	2	1	2	2	1	#NULL!	2	#NULL!	#NULL!	#NULL!	#NULL!	#NULL!	didn't give educatio	1
1	1	1	2	3	700	0	#NULL!	1	2	1	0	3	1	3	1	1	2	#NULL!	#NULL!	#NULL!	#NULL!	#NULL!	#NULL!	#NULL!		2	1	1	1	1	2		2	1	0	#NULL!	#NULL!	#NULL!	#NULL!	#NULL!	#NULL!	#NULL!	#NULL!	#NULL!	#NULL!	#NULL!	#NULL!		2
2	1	1	2	3	1400	0	#NULL!	1	2	1	0	3	1	2	1	1	2	#NULL!	#NULL!	#NULL!	#NULL!	#NULL!	#NULL!	#NULL!		1	2	1	2	2	2		2	1	1	1	2	2	1	1	#NULL!	1	1	2	0	1	2		1
2	1	1	2	3	1800	0	#NULL!	0	#NULL!	1	0	1	1	#NULL!	#NULL!	#NULL!	#NULL!	#NULL!	#NULL!	#NULL!	#NULL!	#NULL!	#NULL!	#NULL!		#NULL!	#NULL!	#NULL!	#NULL!	#NULL!	#NULL!		#NULL!	1	0	#NULL!	#NULL!	#NULL!	#NULL!	#NULL!	#NULL!	#NULL!	#NULL!	#NULL!	#NULL!	#NULL!	#NULL!		2
1	1	1	1	3	2500	0	#NULL!	0	#NULL!	1	0	3	1	3	1	0	1	1	1	2	1	1	2	2		#NULL!	#NULL!	#NULL!	#NULL!	#NULL!	#NULL!		1	1	1	1	1	2	2	2	#NULL!	1	1	2	0	2	2		1
1	1	1	2	5	850	0	#NULL!	1	3	1	0	1	1	#NULL!	#NULL!	#NULL!	#NULL!	#NULL!	#NULL!	#NULL!	#NULL!	#NULL!	#NULL!	#NULL!		#NULL!	#NULL!	#NULL!	#NULL!	#NULL!	#NULL!		#NULL!	2	#NULL!	#NULL!	#NULL!	#NULL!	#NULL!	#NULL!	#NULL!	#NULL!	#NULL!	#NULL!	#NULL!	#NULL!	#NULL!		1
1	1	2	4	3	0	0	#NULL!	0	#NULL!	1	1	3	1	3	0	0	1	1	2	2	1	2	2	2		#NULL!	#NULL!	#NULL!	#NULL!	#NULL!	#NULL!		1	1	0	#NULL!	#NULL!	#NULL!	#NULL!	#NULL!	#NULL!	#NULL!	#NULL!	#NULL!	#NULL!	#NULL!	#NULL!		2
1	1	1	2	3	800	0	#NULL!	1	2	1	0	2	1	1	0	0	1	1	2	2	1	2	2	1		#NULL!	#NULL!	#NULL!	#NULL!	#NULL!	#NULL!		1	1	1	1	1	2	1	2	#NULL!	1	1	2	1	2	2		1
1	1	1	2	3	1000	0	#NULL!	1	2	1	1	1	1	#NULL!	#NULL!	#NULL!	#NULL!	#NULL!	#NULL!	#NULL!	#NULL!	#NULL!	#NULL!	#NULL!		#NULL!	#NULL!	#NULL!	#NULL!	#NULL!	#NULL!		#NULL!	1	0	#NULL!	#NULL!	#NULL!	#NULL!	#NULL!	#NULL!	#NULL!	#NULL!	#NULL!	#NULL!	#NULL!	#NULL!		1
2	1	1	2	2	1300	0	#NULL!	0	#NULL!	1	0	2	1	2	0	0	1	1	2	2	1	2	2	2		#NULL!	#NULL!	#NULL!	#NULL!	#NULL!	#NULL!		1	1	0	#NULL!	1	2	1	2	#NULL!	1	2	2	1	1	2		2
1	1	1	2	2	2000	1	3	1	1	1	1	2	1	#NULL!	1	0	#NULL!	#NULL!	#NULL!	#NULL!	#NULL!	#NULL!	#NULL!	#NULL!		#NULL!	#NULL!	#NULL!	#NULL!	#NULL!	#NULL!		#NULL!	2	#NULL!	#NULL!	#NULL!	#NULL!	#NULL!	#NULL!	#NULL!	#NULL!	#NULL!	#NULL!	#NULL!	#NULL!	#NULL!		2
2	1	1	2	3	1000	1	2	1	1	1	1	1	1	#NULL!	#NULL!	#NULL!	#NULL!	#NULL!	#NULL!	#NULL!	#NULL!	#NULL!	#NULL!	#NULL!		#NULL!	#NULL!	#NULL!	#NULL!	#NULL!	#NULL!		#NULL!	1	0	#NULL!	#NULL!	#NULL!	#NULL!	#NULL!	#NULL!	#NULL!	#NULL!	#NULL!	#NULL!	#NULL!	#NULL!		1
1	1	1	2	3	1500	1	3	1	2	1	0	2	1	1	0	0	2	#NULL!	#NULL!	#NULL!	#NULL!	#NULL!	#NULL!	#NULL!		1	2	1	2	2	1		2	1	1	1	1	2	2	2	#NULL!	1	1	2	1	2	2		1
2	1	1	2	3	1550	0	#NULL!	1	1	1	0	2	1	2	0	0	1	1	1	2	2	2	2	1		#NULL!	#NULL!	#NULL!	#NULL!	#NULL!	#NULL!		1	1	1	1	1	2	1	2	#NULL!	#NULL!	1	2	0	1	2		1
1	1	1	2	3	0	1	2	1	1	1	1	1	1	#NULL!	#NULL!	#NULL!	#NULL!	#NULL!	#NULL!	#NULL!	#NULL!	#NULL!	#NULL!	#NULL!		#NULL!	#NULL!	#NULL!	#NULL!	#NULL!	#NULL!		#NULL!	1	1	1	1	2	1	2	#NULL!	1	1	2	1	2	2		1
1	1	1	2	2	2000	0	#NULL!	0	#NULL!	1	0	1	1	#NULL!	#NULL!	#NULL!	#NULL!	#NULL!	#NULL!	#NULL!	#NULL!	#NULL!	#NULL!	#NULL!		#NULL!	#NULL!	#NULL!	#NULL!	#NULL!	#NULL!		#NULL!	1	1	1	1	2	1	2	#NULL!	1	1	2	0	1	2		1
1	1	2	2	3	400	0	#NULL!	1	2	1	1	2	1	1	1	1	1	1	1	2	2	2	2	2		#NULL!	#NULL!	#NULL!	#NULL!	#NULL!	#NULL!		1	2	#NULL!	#NULL!	#NULL!	#NULL!	#NULL!	#NULL!	#NULL!	#NULL!	#NULL!	#NULL!	#NULL!	#NULL!	#NULL!		1
1	1	1	1	3	200	0	#NULL!	1	3	1	1	3	1	2	0	1	1	1	1	2	1	2	2	2		#NULL!	#NULL!	#NULL!	#NULL!	#NULL!	#NULL!		1	2	#NULL!	#NULL!	#NULL!	#NULL!	#NULL!	#NULL!	#NULL!	#NULL!	#NULL!	#NULL!	#NULL!	#NULL!	#NULL!		1
1	1	1	2	2	450	0	#NULL!	1	3	1	0	3	1	2	0	0	1	1	2	2	1	2	2	2		#NULL!	#NULL!	#NULL!	#NULL!	#NULL!	#NULL!		1	2	#NULL!	#NULL!	#NULL!	#NULL!	#NULL!	#NULL!	#NULL!	#NULL!	#NULL!	#NULL!	#NULL!	#NULL!	#NULL!		2
1	1	1	2	3	200	1	3	1	1	1	0	2	1	2	0	0	2	#NULL!	#NULL!	#NULL!	#NULL!	#NULL!	#NULL!	#NULL!		1	2	1	1	2	2		3	1	1	2	1	2	1	2	#NULL!	1	1	2	1	1	2		1
1	1	1	2	3	1000	0	#NULL!	1	3	1	0	3	1	3	0	0	1	1	1	2	2	2	2	2		#NULL!	#NULL!	#NULL!	#NULL!	#NULL!	#NULL!		2	1	1	2	1	2	2	2	#NULL!	1	1	1	0	1	2		1
1	1	1	1	3	200	0	#NULL!	1	1	1	0	3	1	3	0	1	1	1	2	2	2	2	2	2		#NULL!	#NULL!	#NULL!	#NULL!	#NULL!	#NULL!		1	1	1	1	1	2	1	2	#NULL!	1	1	1	0	2	2		1
1	1	1	2	3	200	0	#NULL!	1	2	1	1	3	1	2	1	0	2	#NULL!	#NULL!	#NULL!	#NULL!	#NULL!	#NULL!	#NULL!		1	2	1	1	2	2		3	1	1	3	1	2	1	2	#NULL!	#NULL!	2	1	0	1	2		1
2	1	1	2	3	2000	0	#NULL!	1	2	1	0	2	1	1	0	0	2	#NULL!	#NULL!	#NULL!	#NULL!	#NULL!	#NULL!	#NULL!		1	2	1	2	2	2		2	1	1	2	1	2	1	2	#NULL!	1	2	1	0	1	2		1
2	2	1	2	3	200	0	#NULL!	1	2	1	1	1	1	#NULL!	#NULL!	#NULL!	#NULL!	#NULL!	#NULL!	#NULL!	#NULL!	#NULL!	#NULL!	#NULL!		#NULL!	#NULL!	#NULL!	#NULL!	#NULL!	#NULL!		#NULL!	2	#NULL!	#NULL!	#NULL!	#NULL!	#NULL!	#NULL!	#NULL!	#NULL!	#NULL!	#NULL!	#NULL!	#NULL!	#NULL!		2
1	1	1	2	3	4000	0	#NULL!	1	2	1	0	3	1	2	0	0	2	#NULL!	#NULL!	#NULL!	#NULL!	#NULL!	#NULL!	#NULL!		1	1	1	2	2	2		1	1	0	#NULL!	1	2	1	2	#NULL!	#NULL!	2	1	0	1	2		1
1	1	1	1	3	600	0	#NULL!	1	2	1	1	1	1	#NULL!	#NULL!	#NULL!	#NULL!	#NULL!	#NULL!	#NULL!	#NULL!	#NULL!	#NULL!	#NULL!		#NULL!	#NULL!	#NULL!	#NULL!	#NULL!	#NULL!		#NULL!	2	#NULL!	#NULL!	#NULL!	#NULL!	#NULL!	#NULL!	#NULL!	#NULL!	#NULL!	#NULL!	#NULL!	#NULL!	#NULL!		1
2	1	1	6	2	400	0	#NULL!	0	#NULL!	1	0	2	1	1	0	0	1	1	2	2	2	2	2	2		#NULL!	#NULL!	#NULL!	#NULL!	#NULL!	#NULL!		1	1	1	1	1	2	2	2	#NULL!	1	1	2	1	1	2		2
2	1	1	1	4	600	1	2	1	1	1	0	1	1	#NULL!	#NULL!	#NULL!	#NULL!	#NULL!	#NULL!	#NULL!	#NULL!	#NULL!	#NULL!	#NULL!		#NULL!	#NULL!	#NULL!	#NULL!	#NULL!	#NULL!		#NULL!	1	1	2	1	1	1	2	#NULL!	1	1	1	0	1	2		2
3	2	2	6	3	600	0	#NULL!	0	#NULL!	1	0	2	1	2	1	0	2	#NULL!	#NULL!	#NULL!	#NULL!	#NULL!	#NULL!	#NULL!		1	2	1	2	2	2	free maternity servi	2	1	0	#NULL!	#NULL!	#NULL!	#NULL!	#NULL!	#NULL!	#NULL!	#NULL!	#NULL!	#NULL!	#NULL!	#NULL!		1
1	1	1	3	2	1500	0	#NULL!	0	#NULL!	1	1	1	1	#NULL!	#NULL!	#NULL!	#NULL!	#NULL!	#NULL!	#NULL!	#NULL!	#NULL!	#NULL!	#NULL!		#NULL!	#NULL!	#NULL!	#NULL!	#NULL!	#NULL!		#NULL!	2	#NULL!	#NULL!	#NULL!	#NULL!	#NULL!	#NULL!	#NULL!	#NULL!	#NULL!	#NULL!	#NULL!	#NULL!	#NULL!		1
2	1	1	1	3	3000	1	3	1	1	1	1	3	1	2	1	0	2	#NULL!	#NULL!	#NULL!	#NULL!	#NULL!	#NULL!	#NULL!		1	1	1	1	2	2		2	1	1	2	1	2	1	1	#NULL!	1	1	2	1	2	2		1
2	1	1	5	3	1000	1	1	1	2	1	0	2	1	1	1	0	1	1	1	2	2	2	2	2		#NULL!	#NULL!	#NULL!	#NULL!	#NULL!	#NULL!		1	2	#NULL!	#NULL!	#NULL!	#NULL!	#NULL!	#NULL!	#NULL!	#NULL!	#NULL!	#NULL!	#NULL!	#NULL!	#NULL!		1
2	1	1	1	2	600	0	#NULL!	0	#NULL!	1	0	3	1	2	0	0	1	1	1	2	2	2	2	2		#NULL!	#NULL!	#NULL!	#NULL!	#NULL!	#NULL!		1	2	#NULL!	#NULL!	#NULL!	#NULL!	#NULL!	#NULL!	#NULL!	#NULL!	#NULL!	#NULL!	#NULL!	#NULL!	#NULL!		1
2	1	1	1	5	350	0	#NULL!	0	#NULL!	1	1	3	1	2	1	0	2	#NULL!	#NULL!	#NULL!	#NULL!	#NULL!	#NULL!	#NULL!		1	2	1	2	1	2		3	1	1	3	1	2	1	2	#NULL!	1	1	2	1	2	2		1
2	1	1	1	2	600	0	#NULL!	0	#NULL!	1	1	1	1	#NULL!	#NULL!	#NULL!	#NULL!	#NULL!	#NULL!	#NULL!	#NULL!	#NULL!	#NULL!	#NULL!		#NULL!	#NULL!	#NULL!	#NULL!	#NULL!	#NULL!		#NULL!	1	1	1	1	2	1	2	#NULL!	1	1	2	0	1	2		2
1	1	1	1	2	400	0	#NULL!	0	#NULL!	1	0	2	1	1	0	0	2	#NULL!	#NULL!	#NULL!	#NULL!	#NULL!	#NULL!	#NULL!		2	2	1	1	2	2		2	2	#NULL!	#NULL!	#NULL!	#NULL!	#NULL!	#NULL!	#NULL!	#NULL!	#NULL!	#NULL!	#NULL!	#NULL!	#NULL!		1
2	2	2	1	3	2000	0	#NULL!	0	#NULL!	1	1	3	1	2	1	0	1	1	2	2	1	2	2	2		#NULL!	#NULL!	#NULL!	#NULL!	#NULL!	#NULL!		1	1	0	#NULL!	#NULL!	#NULL!	#NULL!	#NULL!	#NULL!	#NULL!	#NULL!	#NULL!	#NULL!	#NULL!	#NULL!		1
1	1	1	1	3	2000	1	3	1	3	1	1	3	2	1	1	0	1	1	2	2	2	2	2	2		#NULL!	#NULL!	#NULL!	#NULL!	#NULL!	#NULL!		1	1	0	#NULL!	#NULL!	#NULL!	#NULL!	#NULL!	#NULL!	#NULL!	#NULL!	#NULL!	#NULL!	#NULL!	#NULL!		1
1	1	1	1	2	1200	0	#NULL!	1	1	1	1	1	1	#NULL!	#NULL!	#NULL!	#NULL!	#NULL!	#NULL!	#NULL!	#NULL!	#NULL!	#NULL!	#NULL!		#NULL!	#NULL!	#NULL!	#NULL!	#NULL!	#NULL!		#NULL!	2	#NULL!	#NULL!	#NULL!	#NULL!	#NULL!	#NULL!	#NULL!	#NULL!	#NULL!	#NULL!	#NULL!	#NULL!	#NULL!		2
1	1	1	2	3	500	0	#NULL!	1	2	1	1	2	1	2	0	0	1	1	1	2	2	2	2	2		#NULL!	#NULL!	#NULL!	#NULL!	#NULL!	#NULL!		1	2	#NULL!	#NULL!	#NULL!	#NULL!	#NULL!	#NULL!	#NULL!	#NULL!	#NULL!	#NULL!	#NULL!	#NULL!	#NULL!		2
1	1	1	4	2	300	0	#NULL!	0	#NULL!	1	1	2	1	2	0	0	1	2	1	2	2	2	2	2		#NULL!	#NULL!	#NULL!	#NULL!	#NULL!	#NULL!		1	2	#NULL!	#NULL!	#NULL!	#NULL!	#NULL!	#NULL!	#NULL!	#NULL!	#NULL!	#NULL!	#NULL!	#NULL!	#NULL!		2
1	1	1	2	3	2000	0	#NULL!	1	2	1	1	3	1	2	0	0	1	1	2	2	1	2	2	2		#NULL!	#NULL!	#NULL!	#NULL!	#NULL!	#NULL!		1	1	1	2	1	2	1	2	#NULL!	1	2	1	0	2	2		1
1	1	1	4	1	400	0	#NULL!	0	#NULL!	1	0	1	1	#NULL!	#NULL!	#NULL!	#NULL!	#NULL!	#NULL!	#NULL!	#NULL!	#NULL!	#NULL!	#NULL!		#NULL!	#NULL!	#NULL!	#NULL!	#NULL!	#NULL!		#NULL!	1	0	#NULL!	#NULL!	#NULL!	#NULL!	#NULL!	#NULL!	#NULL!	#NULL!	#NULL!	#NULL!	#NULL!	#NULL!		1
1	1	1	2	4	600	1	2	1	1	1	0	3	1	3	1	0	2	#NULL!	#NULL!	#NULL!	#NULL!	#NULL!	#NULL!	#NULL!		1	1	1	2	2	2		2	1	1	3	1	2	1	2	#NULL!	1	1	1	1	2	2		1
1	1	1	2	3	350	0	#NULL!	0	#NULL!	1	1	2	1	1	0	0	2	#NULL!	#NULL!	#NULL!	#NULL!	#NULL!	#NULL!	#NULL!		2	1	1	2	2	2		2	1	1	2	2	1	1	2	#NULL!	1	1	1	0	2	2		1
1	1	1	2	3	400	0	#NULL!	1	2	1	1	2	1	1	0	0	1	1	2	2	2	2	2	2		#NULL!	#NULL!	#NULL!	#NULL!	#NULL!	#NULL!		1	1	0	#NULL!	#NULL!	#NULL!	#NULL!	#NULL!	#NULL!	#NULL!	#NULL!	#NULL!	#NULL!	#NULL!	#NULL!		1
1	1	1	2	3	300	0	#NULL!	1	2	1	1	2	1	1	0	0	2	#NULL!	#NULL!	#NULL!	#NULL!	#NULL!	#NULL!	#NULL!		2	2	1	2	2	2		2	1	1	1	1	2	1	2	#NULL!	1	1	1	0	2	2		1
1	1	1	2	1	400	0	#NULL!	0	#NULL!	1	1	3	1	2	0	0	1	1	2	2	1	2	2	2		#NULL!	#NULL!	#NULL!	#NULL!	#NULL!	#NULL!		1	1	1	2	2	2	1	2	#NULL!	1	1	1	0	2	2		1
1	1	1	2	4	500	0	#NULL!	1	1	1	1	1	1	#NULL!	#NULL!	#NULL!	#NULL!	#NULL!	#NULL!	#NULL!	#NULL!	#NULL!	#NULL!	#NULL!		#NULL!	#NULL!	#NULL!	#NULL!	#NULL!	#NULL!		#NULL!	1	1	3	1	2	1	2	#NULL!	1	1	1	0	2	2		1
1	1	1	2	4	1100	0	#NULL!	1	1	1	0	2	1	1	0	0	2	#NULL!	#NULL!	#NULL!	#NULL!	#NULL!	#NULL!	#NULL!		2	2	1	2	2	2		3	1	1	2	1	2	2	1	#NULL!	1	1	1	0	2	2		1
1	1	1	2	4	800	0	#NULL!	0	#NULL!	1	0	2	1	1	0	0	2	#NULL!	#NULL!	#NULL!	#NULL!	#NULL!	#NULL!	#NULL!		2	1	1	2	2	2		2	1	0	#NULL!	#NULL!	#NULL!	#NULL!	#NULL!	#NULL!	#NULL!	#NULL!	#NULL!	#NULL!	#NULL!	#NULL!		2
1	1	1	2	1	200	0	#NULL!	0	#NULL!	1	1	3	1	2	0	0	2	#NULL!	#NULL!	#NULL!	#NULL!	#NULL!	#NULL!	#NULL!		2	2	1	2	2	2		2	1	0	#NULL!	#NULL!	#NULL!	#NULL!	#NULL!	#NULL!	#NULL!	#NULL!	#NULL!	#NULL!	#NULL!	#NULL!		1
1	3	1	4	2	400	0	#NULL!	1	2	1	1	2	1	2	0	0	1	1	1	2	2	2	2	2		#NULL!	#NULL!	#NULL!	#NULL!	#NULL!	#NULL!		1	1	1	3	1	2	2	2	#NULL!	1	1	2	1	1	2		1
1	1	1	2	1	300	0	#NULL!	1	2	1	0	3	1	3	0	0	1	1	2	2	2	2	2	2		#NULL!	#NULL!	#NULL!	#NULL!	#NULL!	#NULL!		1	1	0	#NULL!	#NULL!	#NULL!	#NULL!	#NULL!	#NULL!	#NULL!	#NULL!	#NULL!	#NULL!	#NULL!	#NULL!		1
1	1	1	2	3	700	0	#NULL!	1	1	1	1	3	1	3	0	0	1	1	2	2	2	2	2	2		#NULL!	#NULL!	#NULL!	#NULL!	#NULL!	#NULL!		1	1	0	#NULL!	#NULL!	#NULL!	#NULL!	#NULL!	#NULL!	#NULL!	#NULL!	#NULL!	#NULL!	#NULL!	#NULL!		1
2	1	1	2	1	300	0	#NULL!	0	#NULL!	1	0	2	1	1	0	0	1	1	2	2	2	2	2	2		#NULL!	#NULL!	#NULL!	#NULL!	#NULL!	#NULL!		1	1	1	3	2	1	1	2	#NULL!	1	1	1	0	2	2		1
1	1	1	2	3	4000	1	2	1	1	1	1	2	1	1	0	0	1	1	2	2	2	2	2	2		#NULL!	#NULL!	#NULL!	#NULL!	#NULL!	#NULL!		1	1	1	2	1	1	1	2	#NULL!	1	1	1	0	2	2		1
2	1	1	2	3	400	0	#NULL!	0	#NULL!	1	0	3	1	2	0	0	1	1	2	2	2	2	2	2		#NULL!	#NULL!	#NULL!	#NULL!	#NULL!	#NULL!		1	1	0	#NULL!	#NULL!	#NULL!	#NULL!	#NULL!	#NULL!	#NULL!	#NULL!	#NULL!	#NULL!	#NULL!	#NULL!		2
1	1	2	6	3	750	0	#NULL!	0	#NULL!	1	0	2	1	2	0	0	1	1	2	2	1	2	2	2		#NULL!	#NULL!	#NULL!	#NULL!	#NULL!	#NULL!		1	1	0	#NULL!	#NULL!	#NULL!	#NULL!	#NULL!	#NULL!	#NULL!	#NULL!	#NULL!	#NULL!	#NULL!	#NULL!		2
1	1	1	5	1	600	0	#NULL!	0	#NULL!	1	1	2	1	1	0	0	1	1	2	1	1	2	2	2		#NULL!	#NULL!	#NULL!	#NULL!	#NULL!	#NULL!		1	1	1	1	1	2	2	2	#NULL!	1	1	1	1	2	2		2
1	1	1	5	3	600	0	#NULL!	1	2	1	1	3	1	2	0	0	1	1	1	2	1	2	2	2		#NULL!	#NULL!	#NULL!	#NULL!	#NULL!	#NULL!		1	2	#NULL!	#NULL!	#NULL!	#NULL!	#NULL!	#NULL!	#NULL!	#NULL!	#NULL!	#NULL!	#NULL!	#NULL!	#NULL!		2
1	1	1	2	3	500	0	#NULL!	0	#NULL!	1	0	2	1	1	0	0	2	#NULL!	#NULL!	#NULL!	#NULL!	#NULL!	#NULL!	#NULL!		1	2	1	2	2	2		3	1	1	1	1	2	1	2	#NULL!	1	1	2	1	2	2		1
2	1	1	2	3	1200	0	#NULL!	1	1	1	1	1	1	#NULL!	#NULL!	#NULL!	#NULL!	#NULL!	#NULL!	#NULL!	#NULL!	#NULL!	#NULL!	#NULL!		#NULL!	#NULL!	#NULL!	#NULL!	#NULL!	#NULL!		#NULL!	1	1	1	2	2	1	2	#NULL!	2	#NULL!	#NULL!	#NULL!	#NULL!	#NULL!		2
1	1	1	6	4	1050	0	#NULL!	0	#NULL!	1	0	1	1	#NULL!	#NULL!	#NULL!	#NULL!	#NULL!	#NULL!	#NULL!	#NULL!	#NULL!	#NULL!	#NULL!		#NULL!	#NULL!	#NULL!	#NULL!	#NULL!	#NULL!		#NULL!	1	0	#NULL!	#NULL!	#NULL!	#NULL!	#NULL!	#NULL!	#NULL!	#NULL!	#NULL!	#NULL!	#NULL!	#NULL!		2
1	1	1	2	3	4000	1	2	0	#NULL!	1	0	2	1	1	1	0	2	#NULL!	#NULL!	#NULL!	#NULL!	#NULL!	#NULL!	#NULL!		1	2	1	1	2	2		2	1	0	#NULL!	#NULL!	#NULL!	#NULL!	#NULL!	#NULL!	#NULL!	#NULL!	#NULL!	#NULL!	#NULL!	#NULL!		1
1	1	1	2	5	500	1	2	0	#NULL!	1	0	2	1	1	0	0	2	#NULL!	#NULL!	#NULL!	#NULL!	#NULL!	#NULL!	#NULL!		1	2	1	2	1	2		3	1	1	1	1	1	2	2	#NULL!	1	1	1	0	2	2		2
1	1	1	2	3	5000	0	#NULL!	1	#NULL!	1	0	2	1	2	0	0	2	#NULL!	#NULL!	#NULL!	#NULL!	#NULL!	#NULL!	#NULL!		1	2	1	2	1	2		2	1	1	1	1	2	2	2	#NULL!	1	1	2	1	2	1		1
1	1	1	2	3	450	0	#NULL!	1	1	1	0	1	1	#NULL!	#NULL!	#NULL!	#NULL!	#NULL!	#NULL!	#NULL!	#NULL!	#NULL!	#NULL!	#NULL!		#NULL!	#NULL!	#NULL!	#NULL!	#NULL!	#NULL!		#NULL!	2	#NULL!	#NULL!	#NULL!	#NULL!	#NULL!	#NULL!	#NULL!	#NULL!	#NULL!	#NULL!	#NULL!	#NULL!	#NULL!		2
2	1	1	2	3	3000	0	#NULL!	1	2	1	0	3	1	3	1	0	2	#NULL!	#NULL!	#NULL!	#NULL!	#NULL!	#NULL!	#NULL!		1	2	1	2	1	2		2	1	1	2	1	2	2	2	#NULL!	1	1	2	1	2	2		1
1	1	1	2	3	3000	0	#NULL!	1	2	1	1	2	1	2	0	0	1	1	2	1	2	1	2	2		#NULL!	#NULL!	#NULL!	#NULL!	#NULL!	#NULL!		2	1	1	1	2	2	1	2	#NULL!	1	1	2	1	1	2		1
1	1	1	2	3	5000	0	#NULL!	1	2	1	0	2	1	2	0	0	2	#NULL!	#NULL!	#NULL!	#NULL!	#NULL!	#NULL!	#NULL!		2	2	1	1	2	2		2	1	1	1	1	2	2	1	#NULL!	1	1	2	1	2	2		2
2	1	1	2	3	300	0	#NULL!	1	2	1	1	1	1	#NULL!	#NULL!	#NULL!	#NULL!	#NULL!	#NULL!	#NULL!	#NULL!	#NULL!	#NULL!	#NULL!		#NULL!	#NULL!	#NULL!	#NULL!	#NULL!	#NULL!		#NULL!	1	0	#NULL!	#NULL!	#NULL!	#NULL!	#NULL!	#NULL!	#NULL!	#NULL!	#NULL!	#NULL!	#NULL!	#NULL!		2
1	1	1	2	3	200	0	#NULL!	1	3	1	1	3	1	2	0	0	1	1	1	2	2	2	2	2		#NULL!	#NULL!	#NULL!	#NULL!	#NULL!	#NULL!		1	1	1	2	2	2	2	1	#NULL!	1	1	2	1	2	2		1
1	1	1	2	2	800	0	#NULL!	1	2	1	1	1	1	#NULL!	#NULL!	#NULL!	#NULL!	#NULL!	#NULL!	#NULL!	#NULL!	#NULL!	#NULL!	#NULL!		#NULL!	#NULL!	#NULL!	#NULL!	#NULL!	#NULL!		#NULL!	1	0	#NULL!	#NULL!	#NULL!	#NULL!	#NULL!	#NULL!	#NULL!	#NULL!	#NULL!	#NULL!	#NULL!	#NULL!		1
2	1	1	2	3	3000	0	#NULL!	1	2	1	1	2	1	2	1	0	2	#NULL!	#NULL!	#NULL!	#NULL!	#NULL!	#NULL!	#NULL!		2	2	1	2	2	2		3	1	1	2	1	2	1	2	#NULL!	1	1	1	0	1	2		1
1	1	1	4	3	5000	0	#NULL!	1	2	1	1	3	1	2	1	0	1	1	2	2	1	2	2	2		#NULL!	#NULL!	#NULL!	#NULL!	#NULL!	#NULL!		1	1	1	1	1	2	1	2	#NULL!	1	1	2	1	1	1		1
1	1	1	5	3	2000	0	#NULL!	1	2	1	0	2	1	1	0	0	2	#NULL!	#NULL!	#NULL!	#NULL!	#NULL!	#NULL!	#NULL!		1	2	1	1	2	2		2	1	1	1	1	2	1	2	#NULL!	1	1	2	0	2	2		1
2	2	2	5	3	3000	0	#NULL!	1	3	1	0	3	1	2	0	0	1	1	2	1	1	2	2	2		#NULL!	#NULL!	#NULL!	#NULL!	#NULL!	#NULL!		1	1	0	#NULL!	#NULL!	#NULL!	#NULL!	#NULL!	#NULL!	#NULL!	#NULL!	#NULL!	#NULL!	#NULL!	#NULL!		1
1	1	1	2	2	0	0	#NULL!	1	3	1	0	1	1	#NULL!	#NULL!	#NULL!	#NULL!	#NULL!	#NULL!	#NULL!	#NULL!	#NULL!	#NULL!	#NULL!		#NULL!	#NULL!	#NULL!	#NULL!	#NULL!	#NULL!		#NULL!	1	0	#NULL!	#NULL!	#NULL!	#NULL!	#NULL!	#NULL!	#NULL!	#NULL!	#NULL!	#NULL!	#NULL!	#NULL!		1
1	1	1	2	2	0	0	#NULL!	1	2	1	0	2	1	1	0	0	2	#NULL!	#NULL!	#NULL!	#NULL!	#NULL!	#NULL!	#NULL!		1	2	1	1	1	2		2	1	1	1	1	2	2	1	#NULL!	1	1	2	1	1	2		2
2	1	1	5	3	0	1	2	1	2	1	0	2	1	1	0	0	2	#NULL!	#NULL!	#NULL!	#NULL!	#NULL!	#NULL!	#NULL!		2	1	1	2	1	2		2	1	1	1	1	1	1	2	#NULL!	1	1	1	0	2	2		2
2	1	1	2	3	0	0	#NULL!	0	#NULL!	1	0	1	1	#NULL!	#NULL!	#NULL!	#NULL!	#NULL!	#NULL!	#NULL!	#NULL!	#NULL!	#NULL!	#NULL!		#NULL!	#NULL!	#NULL!	#NULL!	#NULL!	#NULL!		#NULL!	1	0	#NULL!	#NULL!	#NULL!	#NULL!	#NULL!	#NULL!	#NULL!	#NULL!	#NULL!	#NULL!	#NULL!	#NULL!		1
2	1	1	2	3	0	1	2	1	1	1	0	3	1	2	1	1	2	#NULL!	#NULL!	#NULL!	#NULL!	#NULL!	#NULL!	#NULL!		2	2	2	1	2	2		3	1	1	2	1	2	2	2	#NULL!	1	1	1	0	2	2		2
1	1	1	5	3	2000	1	3	1	2	1	0	3	1	1	1	1	1	2	2	2	1	2	2	2		#NULL!	#NULL!	#NULL!	#NULL!	#NULL!	#NULL!		1	1	0	#NULL!	#NULL!	#NULL!	#NULL!	#NULL!	#NULL!	#NULL!	#NULL!	#NULL!	#NULL!	#NULL!	#NULL!		1
1	1	1	2	3	500	0	#NULL!	0	#NULL!	1	1	1	1	#NULL!	0	#NULL!	#NULL!	#NULL!	#NULL!	#NULL!	#NULL!	#NULL!	#NULL!	#NULL!		#NULL!	#NULL!	#NULL!	#NULL!	#NULL!	#NULL!		#NULL!	1	0	#NULL!	#NULL!	#NULL!	#NULL!	#NULL!	#NULL!	#NULL!	#NULL!	#NULL!	#NULL!	#NULL!	#NULL!		1
1	1	1	3	3	500	0	#NULL!	0	#NULL!	1	1	1	1	#NULL!	#NULL!	#NULL!	#NULL!	#NULL!	#NULL!	#NULL!	#NULL!	#NULL!	#NULL!	#NULL!		#NULL!	#NULL!	#NULL!	#NULL!	#NULL!	#NULL!		#NULL!	1	0	#NULL!	#NULL!	#NULL!	#NULL!	#NULL!	#NULL!	#NULL!	#NULL!	#NULL!	#NULL!	#NULL!	#NULL!		1
1	1	1	2	3	2000	0	#NULL!	0	#NULL!	1	1	1	1	#NULL!	#NULL!	#NULL!	#NULL!	#NULL!	#NULL!	#NULL!	#NULL!	#NULL!	#NULL!	#NULL!		#NULL!	#NULL!	#NULL!	#NULL!	#NULL!	#NULL!		#NULL!	2	#NULL!	#NULL!	#NULL!	#NULL!	#NULL!	#NULL!	#NULL!	#NULL!	#NULL!	#NULL!	#NULL!	#NULL!	#NULL!		2
2	1	1	6	3	600	0	#NULL!	0	#NULL!	1	1	3	1	2	0	0	2	#NULL!	#NULL!	#NULL!	#NULL!	#NULL!	#NULL!	#NULL!		2	1	1	2	1	2		2	1	1	2	1	2	2	2	#NULL!	1	1	2	1	1	2		1
1	1	1	2	3	500	0	#NULL!	0	#NULL!	1	0	1	1	#NULL!	#NULL!	#NULL!	#NULL!	#NULL!	#NULL!	#NULL!	#NULL!	#NULL!	#NULL!	#NULL!		#NULL!	#NULL!	#NULL!	#NULL!	#NULL!	#NULL!		#NULL!	1	1	1	1	2	1	2	#NULL!	1	1	1	0	1	2		1
2	1	1	5	2	2000	0	#NULL!	0	#NULL!	1	1	2	1	1	0	0	2	#NULL!	#NULL!	#NULL!	#NULL!	#NULL!	#NULL!	#NULL!		1	2	1	2	2	2		3	1	1	2	1	2	1	2	#NULL!	#NULL!	1	2	0	1	2		1
1	1	1	6	3	550	0	#NULL!	0	#NULL!	1	0	1	1	#NULL!	#NULL!	#NULL!	#NULL!	#NULL!	#NULL!	#NULL!	#NULL!	#NULL!	#NULL!	#NULL!		#NULL!	#NULL!	#NULL!	#NULL!	#NULL!	#NULL!		#NULL!	1	1	1	1	2	1	2	#NULL!	1	1	1	0	1	2		1
1	1	1	1	3	900	1	3	1	1	1	0	2	1	1	1	1	2	#NULL!	#NULL!	#NULL!	#NULL!	#NULL!	#NULL!	#NULL!		2	2	1	1	2	2		3	1	1	2	1	2	2	2	#NULL!	1	1	2	1	2	1		1
1	1	1	2	3	1300	0	#NULL!	1	3	1	0	1	1	#NULL!	#NULL!	#NULL!	#NULL!	#NULL!	#NULL!	#NULL!	#NULL!	#NULL!	#NULL!	#NULL!		#NULL!	#NULL!	#NULL!	#NULL!	#NULL!	#NULL!		#NULL!	1	1	1	1	2	1	2	#NULL!	1	1	1	1	2	2		1
1	1	1	1	3	500	0	#NULL!	0	#NULL!	1	1	1	1	#NULL!	#NULL!	#NULL!	#NULL!	#NULL!	#NULL!	#NULL!	#NULL!	#NULL!	#NULL!	#NULL!		#NULL!	#NULL!	#NULL!	#NULL!	#NULL!	#NULL!		#NULL!	1	1	1	1	2	1	2	#NULL!	1	1	2	1	2	2		2
3	1	1	1	3	2000	0	#NULL!	1	1	1	0	2	1	2	0	0	2	#NULL!	#NULL!	#NULL!	#NULL!	#NULL!	#NULL!	#NULL!		1	2	1	1	2	2		2	1	1	2	1	2	1	2	#NULL!	1	1	2	1	2	2		2
2	1	1	1	3	500	0	#NULL!	1	2	1	1	1	1	#NULL!	#NULL!	#NULL!	#NULL!	#NULL!	#NULL!	#NULL!	#NULL!	#NULL!	#NULL!	#NULL!		#NULL!	#NULL!	#NULL!	#NULL!	#NULL!	#NULL!		#NULL!	1	1	1	1	2	1	2	#NULL!	1	1	1	1	2	2		2
2	1	1	5	2	0	1	1	1	1	1	1	1	1	#NULL!	#NULL!	#NULL!	#NULL!	#NULL!	#NULL!	#NULL!	#NULL!	#NULL!	#NULL!	#NULL!		#NULL!	#NULL!	#NULL!	#NULL!	#NULL!	#NULL!		#NULL!	1	0	#NULL!	#NULL!	#NULL!	#NULL!	#NULL!	#NULL!	#NULL!	#NULL!	#NULL!	#NULL!	#NULL!	#NULL!		1
2	1	1	1	3	0	0	#NULL!	0	#NULL!	1	1	1	1	#NULL!	#NULL!	#NULL!	#NULL!	#NULL!	#NULL!	#NULL!	#NULL!	#NULL!	#NULL!	#NULL!		#NULL!	#NULL!	#NULL!	#NULL!	#NULL!	#NULL!		#NULL!	2	#NULL!	#NULL!	#NULL!	#NULL!	#NULL!	#NULL!	#NULL!	#NULL!	#NULL!	#NULL!	#NULL!	#NULL!	#NULL!		1
1	1	1	1	2	0	0	#NULL!	0	#NULL!	1	1	1	1	#NULL!	#NULL!	#NULL!	#NULL!	#NULL!	#NULL!	#NULL!	#NULL!	#NULL!	#NULL!	#NULL!		#NULL!	#NULL!	#NULL!	#NULL!	#NULL!	#NULL!		#NULL!	1	1	1	1	2	2	2	#NULL!	1	1	1	1	1	2		2
1	1	1	2	3	0	0	#NULL!	0	#NULL!	1	1	1	1	#NULL!	#NULL!	#NULL!	#NULL!	#NULL!	#NULL!	#NULL!	#NULL!	#NULL!	#NULL!	#NULL!		#NULL!	#NULL!	#NULL!	#NULL!	#NULL!	#NULL!		#NULL!	1	0	#NULL!	#NULL!	#NULL!	#NULL!	#NULL!	#NULL!	#NULL!	#NULL!	#NULL!	#NULL!	#NULL!	#NULL!		2
1	1	1	2	1	500	1	3	0	#NULL!	1	1	1	1	#NULL!	#NULL!	#NULL!	#NULL!	#NULL!	#NULL!	#NULL!	#NULL!	#NULL!	#NULL!	#NULL!		#NULL!	#NULL!	#NULL!	#NULL!	#NULL!	#NULL!		#NULL!	1	1	1	1	2	1	2	#NULL!	1	1	1	1	1	2		2
1	1	1	5	2	2197	1	2	1	1	1	1	1	1	#NULL!	#NULL!	#NULL!	#NULL!	#NULL!	#NULL!	#NULL!	#NULL!	#NULL!	#NULL!	#NULL!		#NULL!	#NULL!	#NULL!	#NULL!	#NULL!	#NULL!		#NULL!	1	1	2	1	2	2	2	#NULL!	1	1	2	1	2	2		1
2	1	1	2	3	500	0	#NULL!	0	#NULL!	1	1	1	1	#NULL!	#NULL!	#NULL!	#NULL!	#NULL!	#NULL!	#NULL!	#NULL!	#NULL!	#NULL!	#NULL!		#NULL!	#NULL!	#NULL!	#NULL!	#NULL!	#NULL!		#NULL!	2	#NULL!	#NULL!	#NULL!	#NULL!	#NULL!	#NULL!	#NULL!	#NULL!	#NULL!	#NULL!	#NULL!	#NULL!	#NULL!		2
2	1	1	5	3	1633	0	#NULL!	0	#NULL!	1	1	1	1	#NULL!	#NULL!	#NULL!	#NULL!	#NULL!	#NULL!	#NULL!	#NULL!	#NULL!	#NULL!	#NULL!		#NULL!	#NULL!	#NULL!	#NULL!	#NULL!	#NULL!		#NULL!	1	1	1	1	2	1	2	#NULL!	1	1	2	1	1	2		2
1	1	1	2	3	0	0	#NULL!	0	#NULL!	1	1	1	1	#NULL!	#NULL!	#NULL!	#NULL!	#NULL!	#NULL!	#NULL!	#NULL!	#NULL!	#NULL!	#NULL!		#NULL!	#NULL!	#NULL!	#NULL!	#NULL!	#NULL!		#NULL!	1	1	1	1	2	1	2	#NULL!	1	1	2	1	2	2		2
1	1	1	1	3	0	0	#NULL!	0	#NULL!	1	1	1	1	#NULL!	#NULL!	#NULL!	#NULL!	#NULL!	#NULL!	#NULL!	#NULL!	#NULL!	#NULL!	#NULL!		#NULL!	#NULL!	#NULL!	#NULL!	#NULL!	#NULL!		#NULL!	1	1	1	1	2	1	2	#NULL!	1	1	1	0	1	2		2
2	1	1	2	3	650	0	#NULL!	0	#NULL!	1	0	1	1	#NULL!	#NULL!	#NULL!	#NULL!	#NULL!	#NULL!	#NULL!	#NULL!	#NULL!	#NULL!	#NULL!		#NULL!	#NULL!	#NULL!	#NULL!	#NULL!	#NULL!		#NULL!	1	1	1	1	2	1	2	#NULL!	1	1	2	0	1	2		1
2	1	1	2	3	0	0	#NULL!	0	#NULL!	1	1	1	1	#NULL!	#NULL!	#NULL!	#NULL!	#NULL!	#NULL!	#NULL!	#NULL!	#NULL!	#NULL!	#NULL!		#NULL!	#NULL!	#NULL!	#NULL!	#NULL!	#NULL!		#NULL!	1	1	1	1	2	1	2	#NULL!	1	1	1	0	1	2		1
1	1	1	2	3	0	0	#NULL!	0	#NULL!	1	0	2	1	1	0	0	2	#NULL!	#NULL!	#NULL!	#NULL!	#NULL!	#NULL!	#NULL!		2	1	1	2	2	2		3	1	1	1	1	2	2	2	#NULL!	1	1	2	1	1	2		2
1	1	1	2	3	750	0	#NULL!	1	2	1	0	2	1	1	0	0	2	#NULL!	#NULL!	#NULL!	#NULL!	#NULL!	#NULL!	#NULL!		1	2	1	2	2	2		2	1	1	2	1	2	1	2	#NULL!	1	1	2	1	1	2		2
1	1	1	2	3	0	0	#NULL!	1	2	1	1	1	1	#NULL!	#NULL!	#NULL!	#NULL!	#NULL!	#NULL!	#NULL!	#NULL!	#NULL!	#NULL!	#NULL!		#NULL!	#NULL!	#NULL!	#NULL!	#NULL!	#NULL!		#NULL!	1	1	1	1	2	1	2	#NULL!	1	1	1	0	1	2		1
2	1	1	2	3	550	0	#NULL!	1	2	1	0	3	1	2	0	0	2	#NULL!	#NULL!	#NULL!	#NULL!	#NULL!	#NULL!	#NULL!		2	1	1	1	2	2		2	1	1	2	1	2	1	2	#NULL!	1	1	2	1	2	2		2
2	1	1	2	3	0	0	#NULL!	0	#NULL!	1	0	1	1	#NULL!	#NULL!	#NULL!	#NULL!	#NULL!	#NULL!	#NULL!	#NULL!	#NULL!	#NULL!	#NULL!		#NULL!	#NULL!	#NULL!	#NULL!	#NULL!	#NULL!		#NULL!	1	1	1	1	2	1	2	#NULL!	1	1	1	0	1	2		1
2	1	1	2	4	600	0	#NULL!	1	3	1	0	1	1	#NULL!	#NULL!	#NULL!	#NULL!	#NULL!	#NULL!	#NULL!	#NULL!	#NULL!	#NULL!	#NULL!		#NULL!	#NULL!	#NULL!	#NULL!	#NULL!	#NULL!		#NULL!	2	#NULL!	#NULL!	#NULL!	#NULL!	#NULL!	#NULL!	#NULL!	#NULL!	#NULL!	#NULL!	#NULL!	#NULL!	#NULL!		2
1	1	1	5	2	0	0	#NULL!	1	1	1	0	2	1	1	0	0	1	1	2	1	2	2	2	2		#NULL!	#NULL!	#NULL!	#NULL!	#NULL!	#NULL!		1	1	1	1	1	2	1	2	#NULL!	1	1	2	0	1	2		1
1	1	1	2	2	1800	1	3	1	1	1	0	2	1	1	0	0	1	1	1	2	2	2	2	2		#NULL!	#NULL!	#NULL!	#NULL!	#NULL!	#NULL!		1	1	0	#NULL!	#NULL!	#NULL!	#NULL!	#NULL!	#NULL!	#NULL!	#NULL!	#NULL!	#NULL!	#NULL!	#NULL!		2
2	2	2	2	2	1700	1	1	1	1	1	0	3	1	2	0	0	2	#NULL!	#NULL!	#NULL!	#NULL!	#NULL!	#NULL!	#NULL!		1	2	1	1	2	2		3	1	0	#NULL!	#NULL!	#NULL!	#NULL!	#NULL!	#NULL!	#NULL!	#NULL!	#NULL!	#NULL!	#NULL!	#NULL!		2
1	1	1	2	2	9000	0	#NULL!	1	2	1	0	2	1	1	0	0	1	1	2	1	2	2	2	1		#NULL!	#NULL!	#NULL!	#NULL!	#NULL!	#NULL!		1	1	1	1	1	2	2	2	#NULL!	1	1	2	0	1	2		1
2	1	1	2	2	4000	0	#NULL!	1	2	1	1	3	1	2	0	0	1	1	2	2	1	2	2	2		#NULL!	#NULL!	#NULL!	#NULL!	#NULL!	#NULL!		1	2	#NULL!	#NULL!	#NULL!	#NULL!	#NULL!	#NULL!	#NULL!	#NULL!	#NULL!	#NULL!	#NULL!	#NULL!	#NULL!		1
1	1	1	2	3	800	0	#NULL!	1	2	1	0	1	1	#NULL!	#NULL!	#NULL!	#NULL!	#NULL!	#NULL!	#NULL!	#NULL!	#NULL!	#NULL!	#NULL!		#NULL!	#NULL!	#NULL!	#NULL!	#NULL!	#NULL!		#NULL!	1	0	#NULL!	#NULL!	#NULL!	#NULL!	#NULL!	#NULL!	#NULL!	#NULL!	#NULL!	#NULL!	#NULL!	#NULL!		2
1	1	1	6	3	1200	0	#NULL!	1	2	1	0	2	1	9	0	0	1	1	2	2	1	2	2	2		#NULL!	#NULL!	#NULL!	#NULL!	#NULL!	#NULL!		1	1	0	#NULL!	#NULL!	#NULL!	#NULL!	#NULL!	#NULL!	#NULL!	#NULL!	#NULL!	#NULL!	#NULL!	#NULL!		2
1	1	1	1	3	1400	0	#NULL!	0	#NULL!	1	1	2	1	1	0	0	2	#NULL!	#NULL!	#NULL!	#NULL!	#NULL!	#NULL!	#NULL!		1	2	1	2	2	2		3	1	1	2	1	2	1	2	#NULL!	1	2	1	0	1	2		1
2	1	1	1	1	800	0	#NULL!	0	#NULL!	1	1	3	1	2	0	0	1	2	1	2	2	2	2	2		#NULL!	#NULL!	#NULL!	#NULL!	#NULL!	#NULL!		1	1	1	3	1	2	2	2	#NULL!	1	2	1	0	2	2		2
2	1	1	2	1	1100	0	#NULL!	0	#NULL!	1	1	3	1	2	0	0	1	1	2	2	2	2	2	2		#NULL!	#NULL!	#NULL!	#NULL!	#NULL!	#NULL!		1	1	0	#NULL!	2	1	2	2	#NULL!	#NULL!	2	1	0	2	2		2
1	1	1	2	1	800	0	#NULL!	0	#NULL!	1	1	3	1	2	0	0	2	#NULL!	#NULL!	#NULL!	#NULL!	#NULL!	#NULL!	#NULL!		1	2	2	2	2	2		2	1	1	2	1	2	2	2	#NULL!	1	2	1	0	2	2		2
1	1	1	2	3	700	0	#NULL!	1	3	1	1	3	1	3	0	0	1	2	1	2	2	2	2	2		#NULL!	#NULL!	#NULL!	#NULL!	#NULL!	#NULL!		1	1	1	2	2	1	2	2	#NULL!	1	2	1	0	2	2		2
1	1	1	2	1	600	0	#NULL!	0	#NULL!	1	1	2	1	1	1	0	1	1	2	2	2	2	2	2		#NULL!	#NULL!	#NULL!	#NULL!	#NULL!	#NULL!		1	1	1	2	1	2	2	2	#NULL!	1	1	2	0	2	2		1
1	1	1	6	1	1000	0	#NULL!	0	#NULL!	1	1	3	1	2	0	0	2	#NULL!	#NULL!	#NULL!	#NULL!	#NULL!	#NULL!	#NULL!		2	2	1	2	2	2		3	1	1	3	1	2	2	2	#NULL!	1	2	1	0	2	2		1
1	1	1	2	1	2500	0	#NULL!	0	#NULL!	1	1	2	1	2	0	0	1	1	2	2	2	2	2	2		#NULL!	#NULL!	#NULL!	#NULL!	#NULL!	#NULL!		1	1	1	2	2	1	2	2	#NULL!	1	1	2	0	2	2		1
1	1	1	2	2	600	0	#NULL!	1	1	1	1	2	1	2	0	0	2	#NULL!	#NULL!	#NULL!	#NULL!	#NULL!	#NULL!	#NULL!		2	2	2	1	1	2		3	1	1	3	2	1	2	2	#NULL!	1	2	2	1	2	2		1
1	1	1	2	3	800	0	#NULL!	0	#NULL!	1	1	2	1	2	0	0	2	#NULL!	#NULL!	#NULL!	#NULL!	#NULL!	#NULL!	#NULL!		2	1	2	2	2	2		2	1	1	3	2	1	2	2	#NULL!	1	1	2	1	2	2		1
1	1	1	2	1	1100	0	#NULL!	0	#NULL!	1	1	3	1	2	0	0	1	2	1	2	2	2	2	2		#NULL!	#NULL!	#NULL!	#NULL!	#NULL!	#NULL!		1	1	1	1	2	1	2	2	#NULL!	1	1	2	1	2	2		1
1	1	1	1	1	700	0	#NULL!	1	2	1	1	3	1	2	0	0	2	#NULL!	#NULL!	#NULL!	#NULL!	#NULL!	#NULL!	#NULL!		2	2	2	1	2	2		2	1	1	3	2	2	2	2	#NULL!	1	1	2	0	2	2		1
2	1	1	1	1	1500	0	#NULL!	1	2	1	1	2	1	2	0	0	2	#NULL!	#NULL!	#NULL!	#NULL!	#NULL!	#NULL!	#NULL!		2	2	2	2	1	2		1	1	0	#NULL!	#NULL!	#NULL!	#NULL!	#NULL!	#NULL!	#NULL!	#NULL!	#NULL!	#NULL!	#NULL!	#NULL!		2
2	1	1	3	1	1400	0	#NULL!	0	#NULL!	1	1	3	1	2	0	0	2	#NULL!	#NULL!	#NULL!	#NULL!	#NULL!	#NULL!	#NULL!		1	1	2	2	1	2		2	2	#NULL!	#NULL!	#NULL!	#NULL!	#NULL!	#NULL!	#NULL!	#NULL!	#NULL!	#NULL!	#NULL!	#NULL!	#NULL!		2
2	1	1	2	1	2500	0	#NULL!	0	#NULL!	1	1	2	1	2	0	0	1	1	1	2	2	2	2	2		#NULL!	#NULL!	#NULL!	#NULL!	#NULL!	#NULL!		1	1	1	1	2	1	2	2	#NULL!	1	1	2	0	2	2		1
2	1	1	1	1	1500	0	#NULL!	0	#NULL!	1	1	2	1	2	0	0	1	1	2	2	2	2	2	2		#NULL!	#NULL!	#NULL!	#NULL!	#NULL!	#NULL!		1	2	#NULL!	#NULL!	#NULL!	#NULL!	#NULL!	#NULL!	#NULL!	#NULL!	#NULL!	#NULL!	#NULL!	#NULL!	#NULL!		1
1	1	1	2	2	500	0	#NULL!	1	2	1	1	2	1	2	0	0	2	#NULL!	#NULL!	#NULL!	#NULL!	#NULL!	#NULL!	#NULL!		2	1	2	2	2	2		2	1	1	2	2	2	1	2	#NULL!	1	1	2	0	2	2		1
2	1	1	1	1	600	0	#NULL!	0	#NULL!	1	1	2	1	2	0	0	1	1	2	2	2	2	2	2		#NULL!	#NULL!	#NULL!	#NULL!	#NULL!	#NULL!		1	1	0	#NULL!	#NULL!	#NULL!	#NULL!	#NULL!	#NULL!	#NULL!	#NULL!	#NULL!	#NULL!	#NULL!	#NULL!		2
2	1	1	2	1	750	0	#NULL!	0	#NULL!	1	1	3	1	2	0	1	2	#NULL!	#NULL!	#NULL!	#NULL!	#NULL!	#NULL!	#NULL!		2	2	2	1	2	2		3	1	1	3	2	1	2	2	#NULL!	1	1	2	0	2	2		1
2	2	1	1	1	600	0	#NULL!	0	#NULL!	1	1	2	1	2	0	0	2	#NULL!	#NULL!	#NULL!	#NULL!	#NULL!	#NULL!	#NULL!		2	2	2	1	2	2		2	1	1	3	2	2	1	2	#NULL!	1	2	2	1	2	2		1
1	1	1	2	1	1200	0	#NULL!	0	#NULL!	1	1	3	1	2	0	0	1	2	2	2	2	2	2	1		#NULL!	#NULL!	#NULL!	#NULL!	#NULL!	#NULL!		1	2	#NULL!	#NULL!	#NULL!	#NULL!	#NULL!	#NULL!	#NULL!	#NULL!	#NULL!	#NULL!	#NULL!	#NULL!	#NULL!		1
1	1	1	1	1	850	0	#NULL!	0	#NULL!	1	1	2	1	1	0	0	2	#NULL!	#NULL!	#NULL!	#NULL!	#NULL!	#NULL!	#NULL!		2	1	2	2	2	2		2	1	1	2	2	1	2	2	#NULL!	1	2	2	1	2	2		1
2	1	1	2	2	1500	0	#NULL!	0	#NULL!	1	1	2	1	2	0	0	2	#NULL!	#NULL!	#NULL!	#NULL!	#NULL!	#NULL!	#NULL!		2	2	2	2	1	2		3	1	1	2	1	2	2	2	#NULL!	1	2	2	1	2	2		1
2	1	1	1	1	1000	0	#NULL!	0	#NULL!	1	1	2	1	2	0	0	2	#NULL!	#NULL!	#NULL!	#NULL!	#NULL!	#NULL!	#NULL!		2	1	2	2	2	2		2	1	1	3	1	2	2	2	#NULL!	1	1	2	0	2	2		1
1	1	1	3	3	1700	0	#NULL!	0	#NULL!	1	1	1	1	#NULL!	#NULL!	#NULL!	#NULL!	#NULL!	#NULL!	#NULL!	#NULL!	#NULL!	#NULL!	#NULL!		2	2	1	2	2	2		2	1	1	3	2	1	2	2	#NULL!	1	2	2	1	2	2		1
1	1	1	2	1	950	0	#NULL!	0	#NULL!	1	1	3	1	2	0	0	2	#NULL!	#NULL!	#NULL!	#NULL!	#NULL!	#NULL!	#NULL!		2	2	1	2	2	2		2	1	1	2	1	2	2	2	#NULL!	1	1	2	0	2	2		1
1	1	1	5	5	1000	1	3	1	1	1	1	2	1	1	0	0	2	#NULL!	#NULL!	#NULL!	#NULL!	#NULL!	#NULL!	#NULL!		2	1	2	2	2	2		2	1	1	2	2	1	2	2	#NULL!	1	1	2	0	2	2		1
2	1	1	1	2	2000	0	#NULL!	1	2	1	1	1	1	#NULL!	#NULL!	#NULL!	#NULL!	#NULL!	#NULL!	#NULL!	#NULL!	#NULL!	#NULL!	#NULL!		#NULL!	#NULL!	#NULL!	#NULL!	#NULL!	#NULL!		#NULL!	1	1	2	2	1	2	2	#NULL!	1	1	2	0	2	2		1
1	1	1	1	3	800	0	#NULL!	1	2	1	0	2	1	2	0	0	1	1	1	1	1	1	2	2		#NULL!	#NULL!	#NULL!	#NULL!	#NULL!	#NULL!		1	2	#NULL!	#NULL!	#NULL!	#NULL!	#NULL!	#NULL!	#NULL!	#NULL!	#NULL!	#NULL!	#NULL!	#NULL!	#NULL!		1
2	1	1	1	2	1000	0	#NULL!	1	2	1	1	3	1	2	0	0	2	#NULL!	#NULL!	#NULL!	#NULL!	#NULL!	#NULL!	#NULL!		2	2	1	2	2	2		3	1	1	2	1	2	2	2	#NULL!	1	1	2	0	2	2		1
2	1	1	1	1	600	0	#NULL!	1	2	1	1	3	1	2	0	0	1	2	1	2	2	2	2	2		#NULL!	#NULL!	#NULL!	#NULL!	#NULL!	#NULL!		1	1	1	2	2	1	2	2	#NULL!	1	2	1	0	2	2		1
1	1	1	1	1	850	0	#NULL!	0	#NULL!	1	1	3	1	3	1	1	1	2	2	2	1	2	2	1		#NULL!	#NULL!	#NULL!	#NULL!	#NULL!	#NULL!		1	1	1	2	2	1	2	2	#NULL!	2	#NULL!	#NULL!	#NULL!	#NULL!	#NULL!		1
1	1	1	1	1	1350	0	#NULL!	0	#NULL!	1	1	3	1	2	0	0	1	1	1	2	2	2	2	2		#NULL!	#NULL!	#NULL!	#NULL!	#NULL!	#NULL!		1	2	#NULL!	#NULL!	#NULL!	#NULL!	#NULL!	#NULL!	#NULL!	#NULL!	#NULL!	#NULL!	#NULL!	#NULL!	#NULL!		2
2	1	1	1	1	400	0	#NULL!	0	#NULL!	1	0	2	1	2	0	0	1	2	1	2	2	2	2	2		#NULL!	#NULL!	#NULL!	#NULL!	#NULL!	#NULL!		1	1	1	2	2	1	2	2	#NULL!	1	2	1	0	2	2		2
1	1	1	1	1	1700	0	#NULL!	1	2	1	1	2	1	1	0	0	1	1	1	2	2	2	2	2		#NULL!	#NULL!	#NULL!	#NULL!	#NULL!	#NULL!		1	1	1	1	2	1	2	2	#NULL!	2	#NULL!	#NULL!	#NULL!	#NULL!	#NULL!		1
1	1	1	1	1	200	0	#NULL!	0	#NULL!	1	1	1	1	#NULL!	#NULL!	#NULL!	#NULL!	#NULL!	#NULL!	#NULL!	#NULL!	#NULL!	#NULL!	#NULL!		#NULL!	#NULL!	#NULL!	#NULL!	#NULL!	#NULL!		#NULL!	1	1	3	2	1	2	2	#NULL!	1	1	2	0	2	2		1
2	1	1	1	1	900	0	#NULL!	0	#NULL!	1	1	3	1	2	1	0	1	2	1	2	2	2	2	2		#NULL!	#NULL!	#NULL!	#NULL!	#NULL!	#NULL!		1	1	1	2	2	1	2	2	#NULL!	1	1	2	0	2	2		1
2	1	1	1	1	900	0	#NULL!	0	#NULL!	1	1	3	1	2	0	0	1	2	1	1	1	2	2	2		#NULL!	#NULL!	#NULL!	#NULL!	#NULL!	#NULL!		1	2	#NULL!	#NULL!	#NULL!	#NULL!	#NULL!	#NULL!	#NULL!	#NULL!	#NULL!	#NULL!	#NULL!	#NULL!	#NULL!		2
1	1	1	1	1	550	0	#NULL!	0	#NULL!	1	1	2	1	2	0	0	1	1	2	1	1	2	2	2		#NULL!	#NULL!	#NULL!	#NULL!	#NULL!	#NULL!		1	1	0	#NULL!	#NULL!	#NULL!	#NULL!	#NULL!	#NULL!	#NULL!	#NULL!	#NULL!	#NULL!	#NULL!	#NULL!		2
1	1	1	1	1	600	0	#NULL!	1	3	1	1	2	1	1	0	0	1	2	1	2	2	2	2	2		#NULL!	#NULL!	#NULL!	#NULL!	#NULL!	#NULL!		1	2	#NULL!	#NULL!	#NULL!	#NULL!	#NULL!	#NULL!	#NULL!	#NULL!	#NULL!	#NULL!	#NULL!	#NULL!	#NULL!		1
2	1	1	1	1	500	0	#NULL!	0	#NULL!	1	1	3	1	2	0	0	1	2	1	2	2	2	2	2		#NULL!	#NULL!	#NULL!	#NULL!	#NULL!	#NULL!		1	2	#NULL!	#NULL!	#NULL!	#NULL!	#NULL!	#NULL!	#NULL!	#NULL!	#NULL!	#NULL!	#NULL!	#NULL!	#NULL!		2
2	1	1	1	1	700	0	#NULL!	0	#NULL!	1	1	2	1	2	0	0	1	1	1	2	2	2	2	2		#NULL!	#NULL!	#NULL!	#NULL!	#NULL!	#NULL!		1	2	#NULL!	#NULL!	#NULL!	#NULL!	#NULL!	#NULL!	#NULL!	#NULL!	#NULL!	#NULL!	#NULL!	#NULL!	#NULL!		2
1	1	1	1	1	950	0	#NULL!	0	#NULL!	1	1	3	1	2	1	1	1	2	1	2	2	2	2	2		#NULL!	#NULL!	#NULL!	#NULL!	#NULL!	#NULL!		1	1	1	2	1	2	2	2	#NULL!	1	2	1	0	2	2		1
2	1	1	1	1	0	0	#NULL!	0	#NULL!	1	1	2	1	2	0	0	1	1	2	2	1	2	2	2		#NULL!	#NULL!	#NULL!	#NULL!	#NULL!	#NULL!		1	1	1	2	2	1	2	2	#NULL!	1	2	1	1	2	2		2
2	1	1	1	1	0	0	#NULL!	0	#NULL!	1	1	3	1	2	0	0	1	2	1	2	2	2	2	2		#NULL!	#NULL!	#NULL!	#NULL!	#NULL!	#NULL!		1	1	1	2	2	1	2	2	#NULL!	1	2	1	0	2	2		2
2	1	1	1	1	400	0	#NULL!	0	#NULL!	1	1	3	1	3	1	0	1	1	2	2	2	2	2	2		#NULL!	#NULL!	#NULL!	#NULL!	#NULL!	#NULL!		1	1	1	2	2	1	2	2	#NULL!	1	2	1	0	2	2		2
2	1	1	1	1	750	0	#NULL!	0	#NULL!	1	1	2	1	2	0	0	2	#NULL!	#NULL!	#NULL!	#NULL!	#NULL!	#NULL!	#NULL!		1	2	2	2	1	2		2	1	1	2	2	2	1	2	#NULL!	1	2	1	0	2	2		2
2	1	1	1	3	1400	1	3	1	3	1	1	2	1	2	0	0	2	#NULL!	#NULL!	#NULL!	#NULL!	#NULL!	#NULL!	#NULL!		2	1	2	2	2	2		3	1	1	2	1	2	2	2	#NULL!	1	2	1	0	2	2		1
2	1	1	1	1	1200	0	#NULL!	0	#NULL!	1	1	2	1	2	0	0	1	1	2	2	2	2	2	2		#NULL!	#NULL!	#NULL!	#NULL!	#NULL!	#NULL!		1	2	#NULL!	#NULL!	#NULL!	#NULL!	#NULL!	#NULL!	#NULL!	#NULL!	#NULL!	#NULL!	#NULL!	#NULL!	#NULL!		2
1	1	1	1	1	950	0	#NULL!	0	#NULL!	1	0	2	1	2	0	0	1	2	1	2	2	2	2	2		#NULL!	#NULL!	#NULL!	#NULL!	#NULL!	#NULL!		1	1	0	#NULL!	#NULL!	#NULL!	#NULL!	#NULL!	#NULL!	#NULL!	#NULL!	#NULL!	#NULL!	#NULL!	#NULL!		2
1	1	1	1	1	1000	0	#NULL!	0	#NULL!	1	1	2	1	2	0	0	1	1	2	2	2	2	2	2		#NULL!	#NULL!	#NULL!	#NULL!	#NULL!	#NULL!		1	1	1	2	2	1	2	2	#NULL!	1	2	1	0	2	2		2
2	1	1	1	1	400	0	#NULL!	0	#NULL!	1	1	2	1	2	0	0	1	2	1	2	2	2	2	2		#NULL!	#NULL!	#NULL!	#NULL!	#NULL!	#NULL!		1	1	1	2	2	1	2	2	#NULL!	1	2	1	0	2	2		2
1	1	1	4	4	4500	1	1	1	2	1	1	2	1	1	0	0	2	#NULL!	#NULL!	#NULL!	#NULL!	#NULL!	#NULL!	#NULL!		2	1	2	2	2	2		3	2	#NULL!	#NULL!	#NULL!	#NULL!	#NULL!	#NULL!	#NULL!	#NULL!	#NULL!	#NULL!	#NULL!	#NULL!	#NULL!		1
1	1	1	1	1	550	0	#NULL!	0	#NULL!	1	1	3	1	2	0	0	1	1	2	2	2	2	2	2		#NULL!	#NULL!	#NULL!	#NULL!	#NULL!	#NULL!		1	2	#NULL!	#NULL!	#NULL!	#NULL!	#NULL!	#NULL!	#NULL!	#NULL!	#NULL!	#NULL!	#NULL!	#NULL!	#NULL!		2
1	1	1	1	3	600	1	3	0	#NULL!	1	0	2	1	1	0	0	1	2	2	2	2	2	2	1		#NULL!	#NULL!	#NULL!	#NULL!	#NULL!	#NULL!		1	1	1	1	2	1	2	2	#NULL!	2	#NULL!	#NULL!	#NULL!	#NULL!	#NULL!		2
2	1	1	1	1	600	0	#NULL!	1	1	1	1	3	1	2	0	1	1	1	2	2	2	2	2	2		#NULL!	#NULL!	#NULL!	#NULL!	#NULL!	#NULL!		1	1	1	2	2	1	2	2	#NULL!	1	1	2	0	2	2		1
1	1	1	1	1	1800	0	#NULL!	0	#NULL!	1	1	1	1	#NULL!	#NULL!	#NULL!	#NULL!	#NULL!	1	#NULL!	#NULL!	#NULL!	#NULL!	#NULL!		#NULL!	#NULL!	#NULL!	#NULL!	#NULL!	#NULL!		1	2	1	2	1	#NULL!	#NULL!	#NULL!	#NULL!	2	#NULL!	#NULL!	#NULL!	#NULL!	#NULL!		1
1	1	1	1	1	600	0	#NULL!	1	2	1	1	1	1	#NULL!	#NULL!	#NULL!	#NULL!	#NULL!	#NULL!	#NULL!	#NULL!	#NULL!	#NULL!	#NULL!		#NULL!	#NULL!	#NULL!	#NULL!	#NULL!	#NULL!		#NULL!	1	1	2	1	2	2	2	#NULL!	1	2	1	0	2	2		1
2	1	1	1	2	450	0	#NULL!	0	#NULL!	1	1	2	1	1	0	0	2	#NULL!	#NULL!	#NULL!	#NULL!	#NULL!	#NULL!	#NULL!		2	2	1	2	2	2		3	1	1	2	2	1	2	2	#NULL!	1	2	2	1	2	2		1
2	1	1	1	1	750	0	#NULL!	0	#NULL!	1	0	3	1	2	0	0	2	#NULL!	#NULL!	#NULL!	#NULL!	#NULL!	#NULL!	#NULL!		2	2	2	2	1	2		2	1	1	2	2	1	2	2	#NULL!	2	#NULL!	#NULL!	#NULL!	#NULL!	#NULL!		1
2	1	1	1	1	700	0	#NULL!	0	#NULL!	1	1	3	1	2	0	0	2	#NULL!	#NULL!	#NULL!	#NULL!	#NULL!	#NULL!	#NULL!		2	2	1	2	2	2		2	1	1	2	2	1	2	2	#NULL!	1	2	2	1	2	2		1
1	1	1	1	1	650	0	#NULL!	0	#NULL!	1	1	2	1	2	0	0	1	1	2	2	2	2	2	2		#NULL!	#NULL!	#NULL!	#NULL!	#NULL!	#NULL!		1	1	1	1	2	1	2	2	#NULL!	1	2	2	1	2	2		1
1	1	1	1	1	1200	0	#NULL!	1	1	1	0	2	1	2	0	1	1	2	1	2	2	2	2	2		#NULL!	#NULL!	#NULL!	#NULL!	#NULL!	#NULL!		1	1	1	1	1	2	2	2	#NULL!	1	2	1	0	2	2		1
2	1	1	1	3	900	1	3	1	2	1	1	1	1	#NULL!	#NULL!	#NULL!	#NULL!	#NULL!	#NULL!	#NULL!	#NULL!	#NULL!	#NULL!	#NULL!		#NULL!	#NULL!	#NULL!	#NULL!	#NULL!	#NULL!		#NULL!	1	0	#NULL!	#NULL!	#NULL!	#NULL!	#NULL!	#NULL!	#NULL!	#NULL!	#NULL!	#NULL!	#NULL!	#NULL!		1
2	1	1	1	1	600	0	#NULL!	0	#NULL!	1	1	2	1	1	0	0	1	2	1	2	2	2	2	2		#NULL!	#NULL!	#NULL!	#NULL!	#NULL!	#NULL!		1	2	#NULL!	#NULL!	#NULL!	#NULL!	#NULL!	#NULL!	#NULL!	#NULL!	#NULL!	#NULL!	#NULL!	#NULL!	#NULL!		1
2	1	1	1	1	1600	0	#NULL!	0	#NULL!	1	1	3	1	2	1	0	1	1	2	2	2	2	2	2		#NULL!	#NULL!	#NULL!	#NULL!	#NULL!	#NULL!		1	1	0	#NULL!	#NULL!	#NULL!	#NULL!	#NULL!	#NULL!	#NULL!	#NULL!	#NULL!	#NULL!	#NULL!	#NULL!		1
2	1	1	1	1	600	0	#NULL!	0	#NULL!	1	1	2	1	1	0	0	1	2	1	2	2	2	2	2		#NULL!	#NULL!	#NULL!	#NULL!	#NULL!	#NULL!		1	2	#NULL!	#NULL!	#NULL!	#NULL!	#NULL!	#NULL!	#NULL!	#NULL!	#NULL!	#NULL!	#NULL!	#NULL!	#NULL!		1
2	1	1	1	1	600	0	#NULL!	0	#NULL!	1	1	3	1	2	0	0	1	2	1	2	2	2	2	2		#NULL!	#NULL!	#NULL!	#NULL!	#NULL!	#NULL!		1	2	#NULL!	#NULL!	#NULL!	#NULL!	#NULL!	#NULL!	#NULL!	#NULL!	#NULL!	#NULL!	#NULL!	#NULL!	#NULL!		1
2	1	1	1	1	500	0	#NULL!	0	#NULL!	1	1	3	1	2	1	0	1	1	2	2	2	2	2	2		#NULL!	#NULL!	#NULL!	#NULL!	#NULL!	#NULL!		1	1	1	1	1	2	2	2	#NULL!	1	2	2	1	2	2		1
2	1	1	1	3	450	0	#NULL!	0	#NULL!	1	1	1	1	#NULL!	#NULL!	#NULL!	#NULL!	#NULL!	#NULL!	#NULL!	#NULL!	#NULL!	#NULL!	#NULL!		#NULL!	#NULL!	#NULL!	#NULL!	#NULL!	#NULL!		#NULL!	1	1	2	2	1	2	2	#NULL!	2	#NULL!	#NULL!	#NULL!	#NULL!	#NULL!		1
2	1	1	5	5	1000	1	3	1	1	1	1	2	1	2	0	0	2	#NULL!	#NULL!	#NULL!	#NULL!	#NULL!	#NULL!	#NULL!		2	1	2	2	2	2		3	1	1	2	1	2	2	2	#NULL!	1	1	2	0	2	2		1
1	1	1	1	1	950	0	#NULL!	0	#NULL!	1	1	2	1	2	0	0	2	#NULL!	#NULL!	#NULL!	#NULL!	#NULL!	#NULL!	#NULL!		2	1	2	2	2	2		2	1	1	2	1	2	2	2	#NULL!	1	2	2	1	2	2		1
1	1	1	3	3	1350	1	2	1	2	1	1	1	1	#NULL!	#NULL!	#NULL!	#NULL!	#NULL!	#NULL!	#NULL!	#NULL!	#NULL!	#NULL!	#NULL!		#NULL!	#NULL!	#NULL!	#NULL!	#NULL!	#NULL!		#NULL!	2	#NULL!	#NULL!	#NULL!	#NULL!	#NULL!	#NULL!	#NULL!	#NULL!	#NULL!	#NULL!	#NULL!	#NULL!	#NULL!		1
1	1	1	1	2	650	0	#NULL!	0	#NULL!	1	1	2	1	2	0	0	2	#NULL!	#NULL!	#NULL!	#NULL!	#NULL!	#NULL!	#NULL!		2	2	1	2	2	2		3	1	0	#NULL!	#NULL!	#NULL!	#NULL!	#NULL!	#NULL!	#NULL!	#NULL!	#NULL!	#NULL!	#NULL!	#NULL!		1
1	1	1	1	1	650	0	#NULL!	0	#NULL!	1	1	2	1	2	0	0	2	#NULL!	#NULL!	#NULL!	#NULL!	#NULL!	#NULL!	#NULL!		2	2	2	2	1	2		1	1	1	1	1	2	2	2	#NULL!	1	2	2	1	2	2		1
1	1	1	1	1	850	0	#NULL!	0	#NULL!	1	1	2	1	2	0	0	1	1	2	2	2	2	2	2		#NULL!	#NULL!	#NULL!	#NULL!	#NULL!	#NULL!		1	1	1	2	1	2	2	2	#NULL!	1	2	1	0	2	2		1
2	1	1	1	1	750	0	#NULL!	0	#NULL!	1	1	2	1	2	0	0	1	2	1	2	2	2	2	2		#NULL!	#NULL!	#NULL!	#NULL!	#NULL!	#NULL!		1	1	0	#NULL!	#NULL!	#NULL!	#NULL!	#NULL!	#NULL!	#NULL!	#NULL!	#NULL!	#NULL!	#NULL!	#NULL!		1
2	1	1	1	1	550	0	#NULL!	0	#NULL!	1	1	3	1	2	0	0	1	2	1	2	2	2	2	2		#NULL!	#NULL!	#NULL!	#NULL!	#NULL!	#NULL!		1	1	1	2	2	1	2	2	#NULL!	1	2	2	1	2	2		1
2	1	1	1	1	550	0	#NULL!	0	#NULL!	1	1	2	1	1	0	0	2	#NULL!	#NULL!	#NULL!	#NULL!	#NULL!	#NULL!	#NULL!		2	2	2	2	1	2		2	1	1	2	2	1	2	2	#NULL!	1	2	2	1	2	2		1
2	1	1	1	1	450	0	#NULL!	0	#NULL!	1	1	2	1	2	0	0	2	#NULL!	#NULL!	#NULL!	#NULL!	#NULL!	#NULL!	#NULL!		2	2	2	2	1	2		3	1	1	2	2	1	2	2	#NULL!	1	2	2	1	2	2		1
2	1	1	1	1	500	0	#NULL!	0	#NULL!	1	1	3	1	2	1	0	1	1	2	2	2	2	2	2		#NULL!	#NULL!	#NULL!	#NULL!	#NULL!	#NULL!		1	1	1	2	2	1	2	2	#NULL!	1	1	2	0	2	2		1
1	1	1	1	1	1100	0	#NULL!	0	#NULL!	1	1	2	1	2	0	0	2	#NULL!	#NULL!	#NULL!	#NULL!	#NULL!	#NULL!	#NULL!		2	1	2	2	2	2		2	1	1	2	2	1	2	2	#NULL!	1	2	2	1	2	2		1
2	1	1	4	3	900	0	#NULL!	1	2	1	1	1	1	#NULL!	#NULL!	#NULL!	#NULL!	#NULL!	#NULL!	#NULL!	#NULL!	#NULL!	#NULL!	#NULL!		#NULL!	#NULL!	#NULL!	#NULL!	#NULL!	#NULL!		#NULL!	1	1	2	2	1	2	2	#NULL!	1	2	2	1	2	2		1
1	1	1	1	1	450	0	#NULL!	0	#NULL!	1	1	2	1	2	0	0	2	#NULL!	#NULL!	#NULL!	#NULL!	#NULL!	#NULL!	#NULL!		2	1	2	2	2	2		3	1	0	#NULL!	#NULL!	#NULL!	#NULL!	#NULL!	#NULL!	#NULL!	#NULL!	#NULL!	#NULL!	#NULL!	#NULL!		1
1	1	1	1	1	1250	0	#NULL!	0	#NULL!	1	1	2	1	2	0	0	2	#NULL!	#NULL!	#NULL!	#NULL!	#NULL!	#NULL!	#NULL!		2	1	2	2	2	2		2	1	1	2	2	2	2	2	#NULL!	1	2	2	1	2	2		1
1	1	1	1	1	400	0	#NULL!	0	#NULL!	1	1	3	1	3	0	0	1	2	1	2	2	2	2	2		#NULL!	#NULL!	#NULL!	#NULL!	#NULL!	#NULL!		1	1	1	1	2	1	2	2	#NULL!	1	2	1	0	2	2		1
1	2	1	1	1	800	0	#NULL!	0	#NULL!	1	1	2	1	2	0	0	2	#NULL!	#NULL!	#NULL!	#NULL!	#NULL!	#NULL!	#NULL!		2	1	2	2	2	2		3	1	1	1	1	2	2	2	#NULL!	1	2	2	1	2	2		1
1	1	1	1	1	900	0	#NULL!	0	#NULL!	1	1	2	1	1	0	0	1	2	2	2	1	2	2	2		#NULL!	#NULL!	#NULL!	#NULL!	#NULL!	#NULL!		1	2	#NULL!	#NULL!	#NULL!	#NULL!	#NULL!	#NULL!	#NULL!	#NULL!	#NULL!	#NULL!	#NULL!	#NULL!	#NULL!		2
2	1	1	1	1	550	0	#NULL!	0	#NULL!	1	1	3	1	3	1	0	1	1	2	2	2	2	2	2		#NULL!	#NULL!	#NULL!	#NULL!	#NULL!	#NULL!		1	1	1	2	2	1	2	2	#NULL!	1	2	2	1	2	2		1
2	3	1	2	2	400	0	#NULL!	0	#NULL!	1	1	2	1	1	0	0	2	#NULL!	#NULL!	#NULL!	#NULL!	#NULL!	#NULL!	#NULL!		2	1	2	2	2	2		2	1	0	#NULL!	#NULL!	#NULL!	#NULL!	#NULL!	#NULL!	#NULL!	#NULL!	#NULL!	#NULL!	#NULL!	#NULL!		1
2	1	1	2	1	800	0	#NULL!	0	#NULL!	1	1	1	1	#NULL!	#NULL!	#NULL!	#NULL!	#NULL!	#NULL!	#NULL!	#NULL!	#NULL!	#NULL!	#NULL!		#NULL!	#NULL!	#NULL!	#NULL!	#NULL!	#NULL!		#NULL!	1	0	#NULL!	#NULL!	#NULL!	#NULL!	#NULL!	#NULL!	#NULL!	#NULL!	#NULL!	#NULL!	#NULL!	#NULL!		1
1	1	1	2	1	450	0	#NULL!	0	#NULL!	1	1	2	1	2	0	0	2	#NULL!	#NULL!	#NULL!	#NULL!	#NULL!	#NULL!	#NULL!		2	1	2	2	2	2		1	1	1	2	2	1	2	2	#NULL!	1	2	2	1	2	2		1
2	1	1	2	1	500	0	#NULL!	0	#NULL!	1	1	3	1	2	0	0	1	1	2	2	2	2	2	2		#NULL!	#NULL!	#NULL!	#NULL!	#NULL!	#NULL!		1	1	1	2	2	1	2	2	#NULL!	1	2	2	1	2	2		1
2	1	1	1	1	650	0	#NULL!	0	#NULL!	1	1	2	1	1	0	0	1	2	1	2	2	2	2	2		#NULL!	#NULL!	#NULL!	#NULL!	#NULL!	#NULL!		1	1	1	1	2	1	2	2	#NULL!	1	1	2	0	2	2		1
1	1	1	2	1	550	0	#NULL!	0	#NULL!	1	1	3	1	2	0	0	1	2	2	1	2	2	2	2		#NULL!	#NULL!	#NULL!	#NULL!	#NULL!	#NULL!		1	1	0	#NULL!	#NULL!	#NULL!	#NULL!	#NULL!	#NULL!	#NULL!	#NULL!	#NULL!	#NULL!	#NULL!	#NULL!		1
1	1	1	2	1	750	0	#NULL!	0	#NULL!	1	1	2	1	2	0	0	1	2	1	2	2	2	2	2		#NULL!	#NULL!	#NULL!	#NULL!	#NULL!	#NULL!		1	1	0	#NULL!	#NULL!	#NULL!	#NULL!	#NULL!	#NULL!	#NULL!	#NULL!	#NULL!	#NULL!	#NULL!	#NULL!		2
2	1	1	2	1	900	0	#NULL!	0	#NULL!	1	1	3	1	3	0	0	1	2	1	2	2	2	2	2		#NULL!	#NULL!	#NULL!	#NULL!	#NULL!	#NULL!		1	1	1	2	2	1	2	2	#NULL!	1	2	1	0	2	2		2
2	1	1	2	1	950	0	#NULL!	0	#NULL!	1	1	2	1	2	0	0	1	2	1	2	2	2	2	2		#NULL!	#NULL!	#NULL!	#NULL!	#NULL!	#NULL!		1	2	0	#NULL!	#NULL!	#NULL!	#NULL!	#NULL!	#NULL!	#NULL!	#NULL!	#NULL!	#NULL!	#NULL!	#NULL!		2
2	1	1	2	1	650	0	#NULL!	0	#NULL!	1	1	3	1	2	0	0	1	2	1	2	2	2	2	2		#NULL!	#NULL!	#NULL!	#NULL!	#NULL!	#NULL!		1	1	1	2	1	2	2	2	#NULL!	1	2	2	1	2	2		2
2	1	1	2	1	500	0	#NULL!	0	#NULL!	1	1	2	1	1	1	0	1	2	1	2	2	2	2	2		#NULL!	#NULL!	#NULL!	#NULL!	#NULL!	#NULL!		1	2	#NULL!	#NULL!	#NULL!	#NULL!	#NULL!	#NULL!	#NULL!	#NULL!	#NULL!	#NULL!	#NULL!	#NULL!	#NULL!		2
2	1	1	5	5	850	0	#NULL!	0	#NULL!	1	1	3	1	3	0	1	1	2	1	2	1	1	2	2		#NULL!	#NULL!	#NULL!	#NULL!	#NULL!	#NULL!		1	2	#NULL!	#NULL!	#NULL!	#NULL!	#NULL!	#NULL!	#NULL!	#NULL!	#NULL!	#NULL!	#NULL!	#NULL!	#NULL!		2
1	1	1	1	1	1200	0	#NULL!	0	#NULL!	1	0	3	1	2	0	0	2	#NULL!	#NULL!	#NULL!	#NULL!	#NULL!	#NULL!	#NULL!		1	1	2	2	2	2		2	1	1	3	1	1	1	2	#NULL!	1	1	1	0	1	2		1
1	1	1	2	2	1500	0	#NULL!	1	3	1	1	2	1	2	0	0	2	#NULL!	#NULL!	#NULL!	#NULL!	#NULL!	#NULL!	#NULL!		2	1	2	1	2	2		2	1	1	2	1	1	1	2	#NULL!	1	1	1	0	1	2		1
2	1	1	2	1	400	0	#NULL!	0	#NULL!	1	0	3	1	2	0	0	1	1	1	2	2	2	2	2		#NULL!	#NULL!	#NULL!	#NULL!	#NULL!	#NULL!		1	1	0	#NULL!	#NULL!	#NULL!	#NULL!	#NULL!	#NULL!	#NULL!	#NULL!	#NULL!	#NULL!	#NULL!	#NULL!		1
2	1	1	6	1	400	0	#NULL!	0	#NULL!	1	1	3	1	2	0	0	1	2	2	2	1	2	2	1		#NULL!	#NULL!	#NULL!	#NULL!	#NULL!	#NULL!		1	1	1	2	1	2	2	2	#NULL!	1	1	2	1	2	2		1
2	1	1	3	3	800	0	#NULL!	1	1	1	1	2	1	1	0	0	2	#NULL!	#NULL!	#NULL!	#NULL!	#NULL!	#NULL!	#NULL!		2	1	1	2	2	2		2	1	1	2	1	1	2	1	#NULL!	1	1	1	0	1	2		1
2	1	1	1	1	1000	0	#NULL!	0	#NULL!	1	1	2	1	1	0	0	2	#NULL!	#NULL!	#NULL!	#NULL!	#NULL!	#NULL!	#NULL!		1	1	2	2	2	2		2	1	1	2	1	1	2	2	#NULL!	1	1	1	1	2	2		1
1	4	1	1	1	300	0	#NULL!	0	#NULL!	1	0	2	1	1	0	0	2	#NULL!	#NULL!	#NULL!	#NULL!	#NULL!	#NULL!	#NULL!		1	2	2	2	2	2		2	1	1	2	1	1	2	2	#NULL!	1	1	1	1	1	2		1
1	1	1	1	1	300	0	#NULL!	0	#NULL!	1	1	2	1	1	0	0	1	1	2	2	2	2	2	2		#NULL!	#NULL!	#NULL!	#NULL!	#NULL!	#NULL!		1	2	#NULL!	#NULL!	#NULL!	#NULL!	#NULL!	#NULL!	#NULL!	#NULL!	#NULL!	#NULL!	#NULL!	#NULL!	#NULL!		2
2	1	1	4	3	450	0	#NULL!	0	#NULL!	1	0	1	1	#NULL!	#NULL!	#NULL!	#NULL!	#NULL!	#NULL!	#NULL!	#NULL!	#NULL!	#NULL!	#NULL!		#NULL!	#NULL!	#NULL!	#NULL!	#NULL!	#NULL!		#NULL!	1	1	2	1	2	2	2	#NULL!	1	1	2	0	1	2		1
2	1	1	1	1	400	0	#NULL!	0	#NULL!	1	0	3	1	3	0	1	1	1	1	2	2	2	2	2		#NULL!	#NULL!	#NULL!	#NULL!	#NULL!	#NULL!		1	1	0	#NULL!	#NULL!	#NULL!	#NULL!	#NULL!	#NULL!	#NULL!	#NULL!	#NULL!	#NULL!	#NULL!	#NULL!		2
1	1	1	1	1	900	0	#NULL!	0	#NULL!	1	1	2	1	2	0	0	2	#NULL!	#NULL!	#NULL!	#NULL!	#NULL!	#NULL!	#NULL!		2	1	1	2	1	2		3	1	1	2	1	1	2	1	#NULL!	1	1	2	1	1	1		1
2	1	1	1	1	700	0	#NULL!	1	1	1	1	3	1	2	1	0	1	1	1	2	1	2	2	2		#NULL!	#NULL!	#NULL!	#NULL!	#NULL!	#NULL!		1	2	#NULL!	#NULL!	#NULL!	#NULL!	#NULL!	#NULL!	#NULL!	#NULL!	#NULL!	#NULL!	#NULL!	#NULL!	#NULL!		2
1	1	1	1	1	520	0	#NULL!	0	#NULL!	1	1	3	1	3	1	0	1	1	1	2	1	2	2	2		#NULL!	#NULL!	#NULL!	#NULL!	#NULL!	#NULL!		1	1	1	2	1	1	1	2	#NULL!	1	1	2	1	1	1		1
2	1	1	1	2	500	0	#NULL!	1	2	1	1	3	1	2	0	0	1	1	2	2	1	2	2	2		#NULL!	#NULL!	#NULL!	#NULL!	#NULL!	#NULL!		1	1	1	2	1	2	2	2	#NULL!	1	2	1	0	1	1		2
1	1	1	1	3	620	0	#NULL!	1	2	1	1	2	1	1	0	0	2	#NULL!	#NULL!	#NULL!	#NULL!	#NULL!	#NULL!	#NULL!		2	2	1	2	2	2		3	1	1	1	2	1	1	2	#NULL!	1	1	1	1	2	1		1
1	1	1	1	3	600	0	#NULL!	0	#NULL!	1	1	3	1	2	0	0	1	1	2	2	1	2	2	2		#NULL!	#NULL!	#NULL!	#NULL!	#NULL!	#NULL!		1	1	0	#NULL!	#NULL!	#NULL!	#NULL!	#NULL!	#NULL!	#NULL!	#NULL!	#NULL!	#NULL!	#NULL!	#NULL!		2
2	1	1	1	5	400	0	#NULL!	0	#NULL!	1	1	2	1	1	0	0	1	1	1	2	2	2	2	2		#NULL!	#NULL!	#NULL!	#NULL!	#NULL!	#NULL!		1	1	0	#NULL!	#NULL!	#NULL!	#NULL!	#NULL!	#NULL!	#NULL!	#NULL!	#NULL!	#NULL!	#NULL!	#NULL!		2
2	1	1	1	1	1000	0	#NULL!	0	#NULL!	1	1	3	1	2	1	0	2	#NULL!	#NULL!	#NULL!	#NULL!	#NULL!	#NULL!	#NULL!		2	1	1	1	2	2		2	1	1	2	1	2	2	2	#NULL!	1	1	1	1	1	2		1
2	1	1	1	3	400	0	#NULL!	1	1	1	1	2	1	1	0	0	2	#NULL!	#NULL!	#NULL!	#NULL!	#NULL!	#NULL!	#NULL!		2	1	1	2	2	2		3	1	1	2	1	1	1	2	#NULL!	1	1	2	1	1	2		1
1	1	1	1	3	280	0	#NULL!	0	#NULL!	1	1	2	1	1	1	1	2	#NULL!	#NULL!	#NULL!	#NULL!	#NULL!	#NULL!	#NULL!		2	2	1	2	1	2		2	1	0	#NULL!	#NULL!	#NULL!	#NULL!	#NULL!	#NULL!	#NULL!	#NULL!	#NULL!	#NULL!	#NULL!	#NULL!		1
1	1	1	1	1	1000	0	#NULL!	0	#NULL!	1	0	1	1	#NULL!	#NULL!	#NULL!	#NULL!	#NULL!	#NULL!	#NULL!	#NULL!	#NULL!	#NULL!	#NULL!		#NULL!	#NULL!	#NULL!	#NULL!	#NULL!	#NULL!		#NULL!	1	0	#NULL!	#NULL!	#NULL!	#NULL!	#NULL!	#NULL!	#NULL!	#NULL!	#NULL!	#NULL!	#NULL!	#NULL!		2
2	1	1	1	1	400	0	#NULL!	0	#NULL!	1	1	3	1	3	1	1	1	1	2	2	1	2	2	2		#NULL!	#NULL!	#NULL!	#NULL!	#NULL!	#NULL!		1	1	1	1	2	1	2	2	#NULL!	1	2	1	1	1	1		2
1	1	1	1	3	405	0	#NULL!	1	2	1	1	3	1	2	0	0	2	#NULL!	#NULL!	#NULL!	#NULL!	#NULL!	#NULL!	#NULL!		2	2	1	2	1	2		3	1	1	2	1	1	1	2	#NULL!	1	1	1	1	1	1		1
1	1	1	1	3	500	0	#NULL!	0	#NULL!	1	1	3	1	2	0	0	2	#NULL!	#NULL!	#NULL!	#NULL!	#NULL!	#NULL!	#NULL!		2	2	1	1	2	2		1	1	0	#NULL!	#NULL!	#NULL!	#NULL!	#NULL!	#NULL!	#NULL!	#NULL!	#NULL!	#NULL!	#NULL!	#NULL!		1
2	1	1	1	1	330	0	#NULL!	0	#NULL!	1	1	2	1	2	0	0	1	1	2	2	1	2	2	2		#NULL!	#NULL!	#NULL!	#NULL!	#NULL!	#NULL!		1	2	#NULL!	#NULL!	#NULL!	#NULL!	#NULL!	#NULL!	#NULL!	#NULL!	#NULL!	#NULL!	#NULL!	#NULL!	#NULL!		2
2	1	1	1	3	532	0	#NULL!	1	3	1	1	2	1	1	0	0	2	#NULL!	#NULL!	#NULL!	#NULL!	#NULL!	#NULL!	#NULL!		2	2	1	2	2	2		3	1	1	1	1	2	1	2	#NULL!	1	1	2	1	1	1		1
2	1	1	1	1	500	0	#NULL!	0	#NULL!	1	1	3	1	1	1	1	1	1	2	2	2	2	2	2		#NULL!	#NULL!	#NULL!	#NULL!	#NULL!	#NULL!		1	2	#NULL!	#NULL!	#NULL!	#NULL!	#NULL!	#NULL!	#NULL!	#NULL!	#NULL!	#NULL!	#NULL!	#NULL!	#NULL!		2
1	1	1	1	3	400	0	#NULL!	0	#NULL!	1	1	3	1	2	0	0	2	#NULL!	#NULL!	#NULL!	#NULL!	#NULL!	#NULL!	#NULL!		2	1	1	2	1	2		3	1	0	#NULL!	#NULL!	#NULL!	#NULL!	#NULL!	#NULL!	#NULL!	#NULL!	#NULL!	#NULL!	#NULL!	#NULL!		2
2	1	1	1	1	320	0	#NULL!	0	#NULL!	1	0	3	1	3	1	0	1	1	1	2	2	2	2	2		#NULL!	#NULL!	#NULL!	#NULL!	#NULL!	#NULL!		1	2	#NULL!	#NULL!	#NULL!	#NULL!	#NULL!	#NULL!	#NULL!	#NULL!	#NULL!	#NULL!	#NULL!	#NULL!	#NULL!		2
2	1	1	1	1	850	0	#NULL!	0	#NULL!	1	1	2	1	2	1	1	1	2	1	2	2	2	2	2		#NULL!	#NULL!	#NULL!	#NULL!	#NULL!	#NULL!		1	2	#NULL!	#NULL!	#NULL!	#NULL!	#NULL!	#NULL!	#NULL!	#NULL!	#NULL!	#NULL!	#NULL!	#NULL!	#NULL!		2
2	1	1	1	1	1350	0	#NULL!	1	3	1	1	2	1	1	0	0	1	2	2	2	2	2	2	1		#NULL!	#NULL!	#NULL!	#NULL!	#NULL!	#NULL!		1	1	1	2	1	2	2	2	#NULL!	1	2	2	1	2	2		1
2	1	1	1	1	400	0	#NULL!	0	#NULL!	1	1	3	1	2	0	0	2	#NULL!	#NULL!	#NULL!	#NULL!	#NULL!	#NULL!	#NULL!		2	1	2	2	2	2		3	1	1	2	2	1	2	2	#NULL!	1	1	2	1	1	2		1
1	1	1	1	1	810	0	#NULL!	0	#NULL!	1	1	3	1	3	0	0	2	#NULL!	#NULL!	#NULL!	#NULL!	#NULL!	#NULL!	#NULL!		1	2	2	1	2	2		3	1	1	2	2	1	2	2	#NULL!	1	1	1	1	2	1		1
1	1	1	1	1	1200	0	#NULL!	0	#NULL!	1	0	2	1	2	0	0	2	#NULL!	#NULL!	#NULL!	#NULL!	#NULL!	#NULL!	#NULL!		1	1	2	1	1	1		2	1	1	2	1	1	1	2	#NULL!	1	1	1	0	1	2		1
1	1	1	1	1	300	0	#NULL!	0	#NULL!	1	0	3	1	2	1	0	1	1	1	2	1	2	2	2		#NULL!	#NULL!	#NULL!	#NULL!	#NULL!	#NULL!		1	1	0	#NULL!	#NULL!	#NULL!	#NULL!	#NULL!	#NULL!	#NULL!	#NULL!	#NULL!	#NULL!	#NULL!	#NULL!		2
1	1	1	1	1	120	0	#NULL!	0	#NULL!	1	1	3	1	2	0	0	1	1	1	2	2	2	2	2		#NULL!	#NULL!	#NULL!	#NULL!	#NULL!	#NULL!		1	1	0	#NULL!	#NULL!	#NULL!	#NULL!	#NULL!	#NULL!	#NULL!	#NULL!	#NULL!	#NULL!	#NULL!	#NULL!		2
1	1	1	1	1	1000	0	#NULL!	0	#NULL!	1	0	2	1	1	0	0	1	1	2	2	2	2	2	2		#NULL!	#NULL!	#NULL!	#NULL!	#NULL!	#NULL!		1	1	0	#NULL!	#NULL!	#NULL!	#NULL!	#NULL!	#NULL!	#NULL!	#NULL!	#NULL!	#NULL!	#NULL!	#NULL!		2
2	1	1	1	3	2200	0	#NULL!	0	#NULL!	1	0	2	1	2	0	0	1	1	2	2	2	2	2	2		#NULL!	#NULL!	#NULL!	#NULL!	#NULL!	#NULL!		1	1	1	2	1	1	1	2	#NULL!	1	1	1	1	1	2		1
1	1	1	1	1	400	0	#NULL!	0	#NULL!	1	0	2	1	1	0	0	1	1	1	2	2	2	2	2		#NULL!	#NULL!	#NULL!	#NULL!	#NULL!	#NULL!		1	1	0	#NULL!	#NULL!	#NULL!	#NULL!	#NULL!	#NULL!	#NULL!	#NULL!	#NULL!	#NULL!	#NULL!	#NULL!		2
2	1	1	1	1	300	0	#NULL!	0	#NULL!	1	1	3	1	3	1	0	1	1	1	2	2	2	2	2		#NULL!	#NULL!	#NULL!	#NULL!	#NULL!	#NULL!		1	2	#NULL!	#NULL!	#NULL!	#NULL!	#NULL!	#NULL!	#NULL!	#NULL!	#NULL!	#NULL!	#NULL!	#NULL!	#NULL!		2
2	1	1	1	1	400	0	#NULL!	0	#NULL!	1	0	1	1	#NULL!	#NULL!	#NULL!	#NULL!	#NULL!	#NULL!	#NULL!	#NULL!	#NULL!	#NULL!	#NULL!		#NULL!	#NULL!	#NULL!	#NULL!	#NULL!	#NULL!		#NULL!	1	1	3	1	2	2	1	#NULL!	1	1	1	0	1	2		1
1	1	1	1	1	300	0	#NULL!	0	#NULL!	1	1	2	1	2	0	0	1	1	2	2	1	2	2	2		#NULL!	#NULL!	#NULL!	#NULL!	#NULL!	#NULL!		1	2	#NULL!	#NULL!	#NULL!	#NULL!	#NULL!	#NULL!	#NULL!	#NULL!	#NULL!	#NULL!	#NULL!	#NULL!	#NULL!		2
1	1	1	1	3	400	0	#NULL!	0	#NULL!	1	1	2	1	2	1	0	2	#NULL!	#NULL!	#NULL!	#NULL!	#NULL!	#NULL!	#NULL!		1	2	2	1	2	2		3	1	1	2	1	1	2	2	#NULL!	1	1	1	0	2	1	HIV test	1
2	1	1	1	1	700	0	#NULL!	0	#NULL!	1	0	2	1	2	0	0	1	2	2	2	1	2	2	1		#NULL!	#NULL!	#NULL!	#NULL!	#NULL!	#NULL!		1	2	#NULL!	#NULL!	#NULL!	#NULL!	#NULL!	#NULL!	#NULL!	#NULL!	#NULL!	#NULL!	#NULL!	#NULL!	#NULL!		1
1	1	1	1	1	400	0	#NULL!	0	#NULL!	1	1	2	1	2	0	0	1	1	2	2	2	2	2	1		#NULL!	#NULL!	#NULL!	#NULL!	#NULL!	#NULL!		1	2	#NULL!	#NULL!	#NULL!	#NULL!	#NULL!	#NULL!	#NULL!	#NULL!	#NULL!	#NULL!	#NULL!	#NULL!	#NULL!		1
1	1	1	1	3	300	0	#NULL!	1	2	1	1	2	1	1	1	1	1	1	2	2	1	2	2	2		#NULL!	#NULL!	#NULL!	#NULL!	#NULL!	#NULL!		1	1	1	1	2	2	2	2	#NULL!	1	1	1	1	2	1		1
1	1	1	1	1	400	0	#NULL!	0	#NULL!	1	0	3	1	3	1	0	1	2	2	2	2	2	2	1		#NULL!	#NULL!	#NULL!	#NULL!	#NULL!	#NULL!		1	1	0	#NULL!	#NULL!	#NULL!	#NULL!	#NULL!	#NULL!	#NULL!	#NULL!	#NULL!	#NULL!	#NULL!	#NULL!		2
1	1	1	1	3	340	0	#NULL!	1	2	1	0	2	1	1	0	0	1	2	2	2	2	2	2	1		#NULL!	#NULL!	#NULL!	#NULL!	#NULL!	#NULL!		1	1	1	1	2	2	2	2	#NULL!	1	1	1	1	2	1		1
2	1	1	1	1	1800	0	#NULL!	0	#NULL!	1	0	3	1	3	0	1	1	2	2	2	1	2	2	1		#NULL!	#NULL!	#NULL!	#NULL!	#NULL!	#NULL!		1	1	0	#NULL!	#NULL!	#NULL!	#NULL!	#NULL!	#NULL!	#NULL!	#NULL!	#NULL!	#NULL!	#NULL!	#NULL!		2
2	1	1	1	1	200	0	#NULL!	0	#NULL!	1	1	3	1	3	1	1	1	2	1	2	2	2	2	1		#NULL!	#NULL!	#NULL!	#NULL!	#NULL!	#NULL!		1	1	0	#NULL!	#NULL!	#NULL!	#NULL!	#NULL!	#NULL!	#NULL!	#NULL!	#NULL!	#NULL!	#NULL!	#NULL!		2
1	1	1	2	1	318	0	#NULL!	1	2	1	1	3	1	2	0	0	2	#NULL!	#NULL!	#NULL!	#NULL!	#NULL!	#NULL!	#NULL!		1	2	2	2	2	2		3	2	#NULL!	#NULL!	#NULL!	#NULL!	#NULL!	#NULL!	#NULL!	#NULL!	#NULL!	#NULL!	#NULL!	#NULL!	#NULL!		2
1	1	1	1	1	400	0	#NULL!	1	1	1	1	3	1	2	1	0	1	2	1	2	2	2	2	2		#NULL!	#NULL!	#NULL!	#NULL!	#NULL!	#NULL!		1	1	0	#NULL!	#NULL!	#NULL!	#NULL!	#NULL!	#NULL!	#NULL!	#NULL!	#NULL!	#NULL!	#NULL!	#NULL!		2
1	1	1	6	3	600	0	#NULL!	1	2	1	1	2	1	1	0	0	2	#NULL!	#NULL!	#NULL!	#NULL!	#NULL!	#NULL!	#NULL!		2	2	1	2	2	2		3	1	1	1	1	1	2	2	#NULL!	2	#NULL!	#NULL!	#NULL!	#NULL!	#NULL!		1
2	1	1	1	1	500	0	#NULL!	0	#NULL!	1	0	3	1	3	1	0	2	#NULL!	#NULL!	#NULL!	#NULL!	#NULL!	#NULL!	#NULL!		2	2	2	2	1	2		3	1	1	2	2	1	2	2	#NULL!	2	#NULL!	#NULL!	#NULL!	#NULL!	#NULL!		1
1	1	1	2	1	610	0	#NULL!	1	2	1	1	2	1	2	0	0	1	2	2	2	2	2	2	1		#NULL!	#NULL!	#NULL!	#NULL!	#NULL!	#NULL!		1	1	1	3	1	1	1	2	#NULL!	2	#NULL!	#NULL!	#NULL!	#NULL!	#NULL!		1
2	1	1	6	1	510	0	#NULL!	0	#NULL!	1	1	2	1	1	0	0	2	#NULL!	#NULL!	#NULL!	#NULL!	#NULL!	#NULL!	#NULL!		2	1	1	2	2	2		1	1	1	1	1	1	1	2	#NULL!	1	1	1	0	1	2		1
1	1	1	6	3	1600	1	3	1	1	1	1	3	1	2	0	0	2	#NULL!	#NULL!	#NULL!	#NULL!	#NULL!	#NULL!	#NULL!		2	2	2	1	2	1		2	1	0	#NULL!	#NULL!	#NULL!	#NULL!	#NULL!	#NULL!	#NULL!	#NULL!	#NULL!	#NULL!	#NULL!	#NULL!		1
1	1	1	6	3	480	0	#NULL!	1	1	1	0	2	1	1	0	0	2	#NULL!	#NULL!	#NULL!	#NULL!	#NULL!	#NULL!	#NULL!		1	2	2	2	2	1		3	1	1	2	1	1	1	2	#NULL!	1	1	1	1	2	2	HIV test	1
1	1	1	2	1	1380	0	#NULL!	0	#NULL!	1	1	3	1	3	1	0	2	#NULL!	#NULL!	#NULL!	#NULL!	#NULL!	#NULL!	#NULL!		2	2	1	1	2	2		2	1	1	1	1	2	2	2	#NULL!	1	1	1	1	2	1		1
1	1	1	5	5	3200	1	1	1	1	1	1	2	1	1	0	0	2	#NULL!	#NULL!	#NULL!	#NULL!	#NULL!	#NULL!	#NULL!		2	1	2	2	2	2		2	1	1	2	1	1	1	1	#NULL!	1	1	1	1	1	1	HIV test	1
2	1	1	2	2	520	0	#NULL!	1	1	1	0	3	1	2	0	0	2	#NULL!	#NULL!	#NULL!	#NULL!	#NULL!	#NULL!	#NULL!		2	2	1	2	1	2		3	1	1	2	1	1	1	2	#NULL!	1	1	1	1	2	1	HIV test	1
2	1	1	2	1	850	0	#NULL!	0	#NULL!	1	1	3	1	2	1	0	1	2	2	2	1	2	2	2		#NULL!	#NULL!	#NULL!	#NULL!	#NULL!	#NULL!		1	1	0	#NULL!	#NULL!	#NULL!	#NULL!	#NULL!	#NULL!	#NULL!	#NULL!	#NULL!	#NULL!	#NULL!	#NULL!		2
2	1	1	2	3	900	0	#NULL!	1	2	1	1	2	1	2	0	0	2	#NULL!	#NULL!	#NULL!	#NULL!	#NULL!	#NULL!	#NULL!		2	2	1	2	1	2		#NULL!	1	1	2	1	1	2	2	#NULL!	1	1	1	1	2	1	HIV test	1
2	1	1	2	3	450	0	#NULL!	1	2	1	1	2	1	1	0	0	2	#NULL!	#NULL!	#NULL!	#NULL!	#NULL!	#NULL!	#NULL!		2	1	2	2	2	2		3	1	1	3	1	1	1	2	#NULL!	1	1	1	1	1	2		1
1	1	1	2	1	600	0	#NULL!	0	#NULL!	1	1	3	1	2	0	1	2	#NULL!	#NULL!	#NULL!	#NULL!	#NULL!	#NULL!	#NULL!		2	2	2	1	2	2		2	1	0	#NULL!	#NULL!	#NULL!	#NULL!	#NULL!	#NULL!	#NULL!	#NULL!	#NULL!	#NULL!	#NULL!	#NULL!		2
2	1	1	1	1	550	0	#NULL!	0	#NULL!	1	0	2	1	1	0	0	2	#NULL!	#NULL!	#NULL!	#NULL!	#NULL!	#NULL!	#NULL!		1	2	2	2	2	2		2	1	0	#NULL!	#NULL!	#NULL!	#NULL!	#NULL!	#NULL!	#NULL!	#NULL!	#NULL!	#NULL!	#NULL!	#NULL!		2
2	1	1	2	1	450	0	#NULL!	0	#NULL!	1	0	2	1	2	0	0	1	1	1	2	2	2	2	2		#NULL!	#NULL!	#NULL!	#NULL!	#NULL!	#NULL!		2	1	1	2	1	2	2	2	#NULL!	1	1	1	0	1	2		1
1	1	1	2	1	550	0	#NULL!	0	#NULL!	1	0	3	1	2	0	0	2	#NULL!	#NULL!	#NULL!	#NULL!	#NULL!	#NULL!	#NULL!		1	2	1	1	2	2		1	1	1	2	1	2	2	2	#NULL!	1	2	1	1	1	2		1
2	1	1	2	3	400	0	#NULL!	0	#NULL!	1	0	2	1	2	0	0	1	2	2	2	2	1	2	2		#NULL!	#NULL!	#NULL!	#NULL!	#NULL!	#NULL!		1	1	1	2	1	1	2	2	#NULL!	1	2	1	1	1	2		1
2	1	1	2	3	300	0	#NULL!	0	#NULL!	1	1	2	1	1	0	0	2	#NULL!	#NULL!	#NULL!	#NULL!	#NULL!	#NULL!	#NULL!		2	1	2	2	2	2		3	1	1	3	1	1	2	2	#NULL!	1	2	1	1	1	2		1
2	1	1	2	2	900	0	#NULL!	0	#NULL!	1	0	3	1	2	0	1	1	2	2	2	1	2	2	2		#NULL!	#NULL!	#NULL!	#NULL!	#NULL!	#NULL!		1	1	1	2	1	2	2	2	#NULL!	1	1	2	0	2	2		1
1	1	1	4	3	500	0	#NULL!	1	2	1	0	1	1	#NULL!	#NULL!	#NULL!	#NULL!	#NULL!	#NULL!	#NULL!	#NULL!	#NULL!	#NULL!	#NULL!		#NULL!	#NULL!	#NULL!	#NULL!	#NULL!	#NULL!		#NULL!	1	1	2	1	1	2	2	#NULL!	1	1	1	1	1	2		1
2	1	1	1	1	1200	0	#NULL!	0	#NULL!	1	0	3	1	2	0	0	2	#NULL!	#NULL!	#NULL!	#NULL!	#NULL!	#NULL!	#NULL!		2	2	2	1	2	2		3	1	1	2	1	2	2	2	#NULL!	1	1	1	0	1	2		1
2	1	1	1	1	800	0	#NULL!	0	#NULL!	1	1	3	1	2	0	0	2	#NULL!	#NULL!	#NULL!	#NULL!	#NULL!	#NULL!	#NULL!		2	2	2	1	2	2		2	1	1	2	1	1	1	2	#NULL!	2	#NULL!	#NULL!	#NULL!	#NULL!	#NULL!		1
1	3	2	1	1	1100	0	#NULL!	0	#NULL!	1	1	3	1	3	0	0	2	#NULL!	#NULL!	#NULL!	#NULL!	#NULL!	#NULL!	#NULL!		2	2	2	2	1	2		1	1	1	2	2	1	2	2	#NULL!	1	2	2	0	1	2		1
2	1	1	2	4	800	0	#NULL!	1	1	1	0	2	1	1	0	0	2	#NULL!	#NULL!	#NULL!	#NULL!	#NULL!	#NULL!	#NULL!		2	1	2	2	2	2		2	1	1	2	1	2	2	2	#NULL!	2	#NULL!	#NULL!	#NULL!	#NULL!	#NULL!		1
1	1	1	2	1	600	0	#NULL!	0	#NULL!	1	1	3	1	2	0	0	1	1	2	2	2	2	2	2		#NULL!	#NULL!	#NULL!	#NULL!	#NULL!	#NULL!		1	1	1	2	1	1	2	2	#NULL!	2	#NULL!	#NULL!	#NULL!	#NULL!	#NULL!		1
2	1	1	2	3	500	0	#NULL!	1	1	1	0	1	1	#NULL!	#NULL!	#NULL!	#NULL!	#NULL!	#NULL!	#NULL!	#NULL!	#NULL!	#NULL!	#NULL!		#NULL!	#NULL!	#NULL!	#NULL!	#NULL!	#NULL!		#NULL!	1	1	3	1	2	1	2	#NULL!	1	1	1	1	1	2		1
2	1	1	2	1	1200	0	#NULL!	0	#NULL!	1	0	3	1	2	0	1	2	#NULL!	#NULL!	#NULL!	#NULL!	#NULL!	#NULL!	#NULL!		2	2	1	1	2	2		1	1	0	#NULL!	#NULL!	#NULL!	#NULL!	#NULL!	#NULL!	#NULL!	#NULL!	#NULL!	#NULL!	#NULL!	#NULL!		2
1	1	1	2	3	1200	0	#NULL!	1	1	1	1	2	1	1	0	0	1	1	2	2	1	2	2	2		#NULL!	#NULL!	#NULL!	#NULL!	#NULL!	#NULL!		1	2	#NULL!	#NULL!	#NULL!	#NULL!	#NULL!	#NULL!	#NULL!	#NULL!	#NULL!	#NULL!	#NULL!	#NULL!	#NULL!		2
2	1	1	1	1	1300	0	#NULL!	0	#NULL!	1	1	3	1	2	0	0	1	2	1	2	1	2	2	2		#NULL!	#NULL!	#NULL!	#NULL!	#NULL!	#NULL!		1	1	1	2	1	1	2	2	#NULL!	1	1	1	1	2	2		1
2	1	1	1	2	1100	0	#NULL!	0	#NULL!	1	1	2	1	1	0	1	1	2	1	2	1	2	2	2		#NULL!	#NULL!	#NULL!	#NULL!	#NULL!	#NULL!		1	1	0	#NULL!	#NULL!	#NULL!	#NULL!	#NULL!	#NULL!	#NULL!	#NULL!	#NULL!	#NULL!	#NULL!	#NULL!		1
2	1	1	1	1	300	1	3	1	1	1	1	3	1	1	1	0	1	2	2	1	1	2	2	2		#NULL!	#NULL!	#NULL!	#NULL!	#NULL!	#NULL!		1	1	1	2	1	1	1	2	#NULL!	1	1	1	1	1	2		1
2	1	1	1	1	450	0	#NULL!	1	1	1	1	3	1	1	1	1	1	1	2	1	1	2	2	2		#NULL!	#NULL!	#NULL!	#NULL!	#NULL!	#NULL!		1	1	1	2	1	1	1	2	#NULL!	1	1	1	1	1	2		1
3	1	1	1	1	750	0	#NULL!	0	#NULL!	1	1	2	1	1	0	0	1	1	1	1	2	2	2	2		#NULL!	#NULL!	#NULL!	#NULL!	#NULL!	#NULL!		1	1	0	#NULL!	#NULL!	#NULL!	#NULL!	#NULL!	#NULL!	#NULL!	#NULL!	#NULL!	#NULL!	#NULL!	#NULL!		2
2	1	1	1	1	1000	0	#NULL!	0	#NULL!	1	0	2	1	2	0	0	1	1	1	2	1	2	2	2		#NULL!	#NULL!	#NULL!	#NULL!	#NULL!	#NULL!		1	1	1	2	1	1	1	2	#NULL!	1	1	1	0	2	2		1
2	1	1	1	2	1400	0	#NULL!	0	#NULL!	1	1	2	1	2	0	0	1	1	1	2	2	2	2	2		#NULL!	#NULL!	#NULL!	#NULL!	#NULL!	#NULL!		1	1	0	#NULL!	#NULL!	#NULL!	#NULL!	#NULL!	#NULL!	#NULL!	#NULL!	#NULL!	#NULL!	#NULL!	#NULL!		1
1	1	1	1	1	300	0	#NULL!	0	#NULL!	1	1	2	1	2	1	1	1	1	2	1	2	2	2	2		#NULL!	#NULL!	#NULL!	#NULL!	#NULL!	#NULL!		1	1	0	#NULL!	#NULL!	#NULL!	#NULL!	#NULL!	#NULL!	#NULL!	#NULL!	#NULL!	#NULL!	#NULL!	#NULL!		1
2	1	1	1	2	1200	1	3	0	#NULL!	1	0	2	1	1	0	0	1	1	2	2	2	2	2	2		#NULL!	#NULL!	#NULL!	#NULL!	#NULL!	#NULL!		1	1	0	#NULL!	#NULL!	#NULL!	#NULL!	#NULL!	#NULL!	#NULL!	#NULL!	#NULL!	#NULL!	#NULL!	#NULL!		2
2	1	1	1	1	500	0	#NULL!	1	3	1	1	2	1	1	0	0	1	1	1	1	2	2	2	2		#NULL!	#NULL!	#NULL!	#NULL!	#NULL!	#NULL!		1	1	0	#NULL!	#NULL!	#NULL!	#NULL!	#NULL!	#NULL!	#NULL!	#NULL!	#NULL!	#NULL!	#NULL!	#NULL!		1
1	1	2	1	2	1100	0	#NULL!	0	#NULL!	1	1	2	1	1	0	0	1	1	1	1	2	2	2	2		#NULL!	#NULL!	#NULL!	#NULL!	#NULL!	#NULL!		1	2	#NULL!	#NULL!	#NULL!	#NULL!	#NULL!	#NULL!	#NULL!	#NULL!	#NULL!	#NULL!	#NULL!	#NULL!	#NULL!		1
2	1	1	1	1	1450	0	#NULL!	0	#NULL!	1	1	3	1	2	0	0	1	1	2	2	2	2	2	2		#NULL!	#NULL!	#NULL!	#NULL!	#NULL!	#NULL!		1	2	#NULL!	#NULL!	#NULL!	#NULL!	#NULL!	#NULL!	#NULL!	#NULL!	#NULL!	#NULL!	#NULL!	#NULL!	#NULL!		1
2	1	2	4	3	850	0	#NULL!	0	#NULL!	1	1	2	1	2	0	0	1	1	2	2	2	2	2	2		#NULL!	#NULL!	#NULL!	#NULL!	#NULL!	#NULL!		1	2	#NULL!	#NULL!	#NULL!	#NULL!	#NULL!	#NULL!	#NULL!	#NULL!	#NULL!	#NULL!	#NULL!	#NULL!	#NULL!		1
2	1	1	1	1	1400	0	#NULL!	0	#NULL!	1	1	3	1	1	1	1	1	1	2	2	2	2	2	2		#NULL!	#NULL!	#NULL!	#NULL!	#NULL!	#NULL!		1	1	0	#NULL!	#NULL!	#NULL!	#NULL!	#NULL!	#NULL!	#NULL!	#NULL!	#NULL!	#NULL!	#NULL!	#NULL!		1
2	1	1	1	2	650	0	#NULL!	1	1	1	1	1	1	#NULL!	#NULL!	#NULL!	1	#NULL!	#NULL!	#NULL!	#NULL!	#NULL!	#NULL!	#NULL!		#NULL!	#NULL!	#NULL!	#NULL!	#NULL!	#NULL!		#NULL!	2	#NULL!	#NULL!	#NULL!	#NULL!	#NULL!	#NULL!	#NULL!	#NULL!	#NULL!	#NULL!	#NULL!	#NULL!	#NULL!		1
1	2	2	5	2	800	0	#NULL!	0	#NULL!	1	0	2	1	1	0	0	2	#NULL!	#NULL!	#NULL!	#NULL!	#NULL!	#NULL!	#NULL!		2	1	2	2	2	2		2	1	1	2	1	2	2	2	#NULL!	1	1	1	1	1	2		1
2	1	1	1	1	1800	0	#NULL!	0	#NULL!	1	1	2	1	1	0	0	1	1	2	2	2	2	2	2		#NULL!	#NULL!	#NULL!	#NULL!	#NULL!	#NULL!		1	1	1	1	1	1	2	2	#NULL!	2	#NULL!	#NULL!	#NULL!	#NULL!	#NULL!		1
2	1	1	1	1	800	0	#NULL!	0	#NULL!	1	1	3	1	1	0	0	1	1	2	2	2	2	2	2		#NULL!	#NULL!	#NULL!	#NULL!	#NULL!	#NULL!		1	1	1	2	1	2	1	2	#NULL!	1	1	1	1	2	2		2
1	1	1	1	1	300	0	#NULL!	0	#NULL!	1	1	2	1	1	1	0	1	1	2	2	2	2	2	2		#NULL!	#NULL!	#NULL!	#NULL!	#NULL!	#NULL!		1	1	1	#NULL!	1	2	1	1	#NULL!	1	1	1	1	1	2		1
2	1	1	1	1	1000	0	#NULL!	1	2	1	0	3	1	2	1	0	2	#NULL!	#NULL!	#NULL!	#NULL!	#NULL!	#NULL!	#NULL!		1	1	2	2	1	2		3	1	1	2	1	1	1	2	#NULL!	1	1	1	0	2	2		1
1	1	1	1	2	1600	1	2	0	#NULL!	1	1	2	1	1	0	0	1	1	2	2	2	2	2	2		#NULL!	#NULL!	#NULL!	#NULL!	#NULL!	#NULL!		1	2	#NULL!	#NULL!	#NULL!	#NULL!	#NULL!	#NULL!	#NULL!	#NULL!	#NULL!	#NULL!	#NULL!	#NULL!	#NULL!		2
2	1	1	1	2	650	1	2	1	2	1	1	3	1	2	1	1	1	1	2	2	2	2	2	2		#NULL!	#NULL!	#NULL!	#NULL!	#NULL!	#NULL!		1	1	1	1	1	2	2	2	#NULL!	2	#NULL!	#NULL!	#NULL!	#NULL!	#NULL!		1
2	1	1	1	1	450	0	#NULL!	0	#NULL!	1	1	3	1	1	1	1	1	1	2	2	2	2	2	2		#NULL!	#NULL!	#NULL!	#NULL!	#NULL!	#NULL!		1	1	1	2	1	2	2	2	#NULL!	1	2	1	0	2	2		2
2	1	1	1	1	1300	0	#NULL!	0	#NULL!	1	0	2	1	2	0	0	2	#NULL!	#NULL!	#NULL!	#NULL!	#NULL!	#NULL!	#NULL!		2	1	2	1	2	2		3	1	1	2	2	2	2	2	#NULL!	1	2	2	0	1	2		1
1	1	1	1	1	600	0	#NULL!	0	#NULL!	1	0	2	1	2	0	0	2	#NULL!	#NULL!	#NULL!	#NULL!	#NULL!	#NULL!	#NULL!		2	2	1	2	2	2		1	1	1	2	2	1	2	2	#NULL!	1	2	1	1	1	2		1
1	1	1	1	1	1500	0	#NULL!	1	2	1	1	3	1	3	0	0	1	1	2	2	2	2	2	1		#NULL!	#NULL!	#NULL!	#NULL!	#NULL!	#NULL!		1	1	1	1	1	2	2	2	#NULL!	1	1	1	1	1	2		2
2	1	1	2	1	950	0	#NULL!	0	#NULL!	1	1	3	1	1	1	1	2	#NULL!	#NULL!	#NULL!	#NULL!	#NULL!	#NULL!	#NULL!		2	2	2	1	2	2		3	1	1	2	1	2	1	2	#NULL!	2	#NULL!	#NULL!	#NULL!	#NULL!	#NULL!		1
1	1	1	1	1	750	0	#NULL!	0	#NULL!	1	1	2	1	2	0	0	1	2	1	2	2	2	2	2		#NULL!	#NULL!	#NULL!	#NULL!	#NULL!	#NULL!		1	2	#NULL!	#NULL!	#NULL!	#NULL!	#NULL!	#NULL!	#NULL!	#NULL!	#NULL!	#NULL!	#NULL!	#NULL!	#NULL!		2
2	1	1	1	2	1200	1	2	1	1	1	1	2	1	2	0	0	2	#NULL!	#NULL!	#NULL!	#NULL!	#NULL!	#NULL!	#NULL!		1	1	1	2	2	2		3	1	1	2	1	1	1	2	#NULL!	1	1	1	1	2	2		1
1	1	1	2	3	850	0	#NULL!	0	#NULL!	1	0	3	1	2	0	0	1	1	2	2	2	2	2	2		#NULL!	#NULL!	#NULL!	#NULL!	#NULL!	#NULL!		1	1	1	2	1	1	2	2	#NULL!	1	1	1	1	1	1		2
2	1	1	4	3	600	1	2	1	1	1	1	2	1	2	0	0	2	#NULL!	#NULL!	#NULL!	#NULL!	#NULL!	#NULL!	#NULL!		1	2	1	1	2	2		2	1	1	2	1	1	1	2	#NULL!	1	1	1	1	2	2		2
2	1	1	1	1	1300	1	3	1	3	1	1	2	1	2	0	0	2	#NULL!	#NULL!	#NULL!	#NULL!	#NULL!	#NULL!	#NULL!		2	2	2	2	1	2		3	1	0	#NULL!	#NULL!	#NULL!	#NULL!	#NULL!	#NULL!	#NULL!	#NULL!	#NULL!	#NULL!	#NULL!	#NULL!		1
2	1	1	1	1	1750	0	#NULL!	1	1	1	1	2	1	1	0	0	1	1	2	2	2	2	2	2		#NULL!	#NULL!	#NULL!	#NULL!	#NULL!	#NULL!		1	1	1	3	1	1	1	1	#NULL!	1	1	1	1	1	2		1
1	1	1	6	1	1300	0	#NULL!	1	2	1	1	3	1	2	0	0	2	#NULL!	#NULL!	#NULL!	#NULL!	#NULL!	#NULL!	#NULL!		1	1	1	2	2	1		2	1	1	3	1	1	1	1	#NULL!	1	1	1	1	1	2		1
1	1	1	2	1	140	0	#NULL!	1	2	1	1	2	1	2	0	0	2	#NULL!	#NULL!	#NULL!	#NULL!	#NULL!	#NULL!	#NULL!		1	1	1	1	1	1		3	1	1	2	1	1	1	1	#NULL!	1	1	1	1	1	1		1
1	1	2	1	1	1600	0	#NULL!	1	2	1	1	2	1	2	0	0	2	#NULL!	#NULL!	#NULL!	#NULL!	#NULL!	#NULL!	#NULL!		1	1	2	2	2	2		2	1	0	#NULL!	#NULL!	#NULL!	#NULL!	#NULL!	#NULL!	#NULL!	#NULL!	#NULL!	#NULL!	#NULL!	#NULL!		1
2	1	1	1	1	1200	0	#NULL!	1	1	1	0	3	1	2	0	0	1	1	1	2	1	2	2	1		#NULL!	#NULL!	#NULL!	#NULL!	#NULL!	#NULL!		1	1	1	2	1	1	1	2	#NULL!	1	1	1	1	1	2		1
1	1	1	2	1	500	0	#NULL!	1	2	1	0	2	1	1	0	0	2	#NULL!	#NULL!	#NULL!	#NULL!	#NULL!	#NULL!	#NULL!		1	1	2	2	2	2		2	1	1	2	1	1	2	2	#NULL!	1	1	1	1	2	2		1
2	1	1	3	3	500	0	#NULL!	0	#NULL!	1	1	2	1	1	0	0	2	#NULL!	#NULL!	#NULL!	#NULL!	#NULL!	#NULL!	#NULL!		2	1	2	2	2	1		3	1	0	#NULL!	#NULL!	#NULL!	#NULL!	#NULL!	#NULL!	#NULL!	#NULL!	#NULL!	#NULL!	#NULL!	#NULL!		1
2	1	1	2	1	660	0	#NULL!	0	#NULL!	1	1	3	1	2	0	0	1	2	2	2	1	2	2	1		#NULL!	#NULL!	#NULL!	#NULL!	#NULL!	#NULL!		1	1	1	1	1	2	2	2	#NULL!	1	1	1	1	2	1		2
1	1	1	2	3	900	0	#NULL!	1	2	1	1	2	1	2	0	0	1	1	1	2	1	2	2	2		#NULL!	#NULL!	#NULL!	#NULL!	#NULL!	#NULL!		2	1	0	#NULL!	#NULL!	#NULL!	#NULL!	#NULL!	#NULL!	#NULL!	#NULL!	#NULL!	#NULL!	#NULL!	#NULL!		2
2	2	2	1	1	1200	0	#NULL!	0	#NULL!	1	1	2	1	2	0	0	2	#NULL!	#NULL!	#NULL!	#NULL!	#NULL!	#NULL!	#NULL!		1	2	2	2	2	2		2	1	0	#NULL!	#NULL!	#NULL!	#NULL!	#NULL!	#NULL!	#NULL!	#NULL!	#NULL!	#NULL!	#NULL!	#NULL!		2
1	1	1	1	3	1300	0	#NULL!	1	2	1	0	2	1	2	0	0	1	1	1	2	2	2	1	1		#NULL!	#NULL!	#NULL!	#NULL!	#NULL!	#NULL!		1	1	1	1	2	1	2	2	#NULL!	2	#NULL!	#NULL!	#NULL!	#NULL!	#NULL!		1
2	1	1	2	1	1400	0	#NULL!	1	1	1	1	3	1	2	0	0	1	1	1	2	2	2	2	2		#NULL!	#NULL!	#NULL!	#NULL!	#NULL!	#NULL!		1	1	1	2	1	1	2	2	#NULL!	1	1	1	1	1	2		1
1	1	1	1	1	1000	0	#NULL!	1	1	1	1	3	1	2	1	1	1	1	1	2	1	1	1	1		#NULL!	#NULL!	#NULL!	#NULL!	#NULL!	#NULL!		1	1	1	3	1	1	1	1	#NULL!	1	1	1	1	1	1		1
2	1	2	1	1	1200	0	#NULL!	0	#NULL!	1	0	3	1	2	1	0	1	1	1	1	1	1	1	2		#NULL!	#NULL!	#NULL!	#NULL!	#NULL!	#NULL!		1	2	#NULL!	#NULL!	#NULL!	#NULL!	#NULL!	#NULL!	#NULL!	#NULL!	#NULL!	#NULL!	#NULL!	#NULL!	#NULL!		1
2	1	1	2	1	600	0	#NULL!	0	#NULL!	1	1	3	1	3	0	1	2	#NULL!	#NULL!	#NULL!	#NULL!	#NULL!	#NULL!	#NULL!		1	2	1	1	2	2		2	1	0	#NULL!	#NULL!	#NULL!	#NULL!	#NULL!	#NULL!	#NULL!	#NULL!	#NULL!	#NULL!	#NULL!	#NULL!		1
1	1	1	2	1	1400	0	#NULL!	0	#NULL!	1	0	3	1	2	0	0	2	#NULL!	#NULL!	#NULL!	#NULL!	#NULL!	#NULL!	#NULL!		1	1	1	2	2	2		2	1	1	2	1	1	2	2	#NULL!	1	1	1	1	2	2		1
2	1	1	1	3	1450	0	#NULL!	0	#NULL!	1	1	2	1	1	0	0	1	1	2	2	2	2	2	2		#NULL!	#NULL!	#NULL!	#NULL!	#NULL!	#NULL!		1	1	1	2	1	2	2	2	#NULL!	2	#NULL!	#NULL!	#NULL!	#NULL!	#NULL!		2
2	1	1	1	1	1000	0	#NULL!	0	#NULL!	1	1	3	1	2	1	1	2	#NULL!	#NULL!	#NULL!	#NULL!	#NULL!	#NULL!	#NULL!		1	2	2	1	2	2		3	1	0	#NULL!	#NULL!	#NULL!	#NULL!	#NULL!	#NULL!	#NULL!	#NULL!	#NULL!	#NULL!	#NULL!	#NULL!		2
1	1	1	1	1	700	0	#NULL!	0	#NULL!	1	1	2	1	2	0	0	1	1	2	2	2	2	2	2		#NULL!	#NULL!	#NULL!	#NULL!	#NULL!	#NULL!		1	1	1	2	1	2	1	2	#NULL!	1	1	1	1	2	2		1
1	1	1	1	3	1350	0	#NULL!	0	#NULL!	1	1	1	1	#NULL!	#NULL!	#NULL!	#NULL!	#NULL!	#NULL!	#NULL!	#NULL!	#NULL!	#NULL!	#NULL!		#NULL!	#NULL!	#NULL!	#NULL!	#NULL!	#NULL!		#NULL!	1	1	3	1	1	2	2	#NULL!	1	1	1	1	1	1		1
2	1	1	6	1	1400	0	#NULL!	0	#NULL!	1	1	3	1	3	1	1	1	1	2	2	1	2	2	1		#NULL!	#NULL!	#NULL!	#NULL!	#NULL!	#NULL!		1	1	1	2	1	2	2	2	#NULL!	2	#NULL!	#NULL!	#NULL!	#NULL!	#NULL!		1
2	1	1	6	1	1500	0	#NULL!	0	#NULL!	1	1	3	1	2	1	1	1	1	2	2	1	2	2	2		#NULL!	#NULL!	#NULL!	#NULL!	#NULL!	#NULL!		1	1	1	2	1	2	2	2	#NULL!	2	#NULL!	#NULL!	#NULL!	#NULL!	#NULL!		1
1	1	1	1	4	900	1	2	1	1	1	1	3	1	2	1	0	2	#NULL!	#NULL!	#NULL!	#NULL!	#NULL!	#NULL!	#NULL!		1	2	2	2	1	1		2	1	0	#NULL!	#NULL!	#NULL!	#NULL!	#NULL!	#NULL!	#NULL!	#NULL!	#NULL!	#NULL!	#NULL!	#NULL!		1
1	1	1	4	2	600	1	2	1	2	1	1	2	1	2	0	0	1	1	2	1	2	2	2	2		#NULL!	#NULL!	#NULL!	#NULL!	#NULL!	#NULL!		1	1	1	3	1	2	2	2	#NULL!	1	2	1	1	2	2		1
2	1	2	2	1	950	0	#NULL!	0	#NULL!	1	1	2	1	1	0	0	1	1	2	2	2	2	2	2		#NULL!	#NULL!	#NULL!	#NULL!	#NULL!	#NULL!		1	2	#NULL!	#NULL!	#NULL!	#NULL!	#NULL!	#NULL!	#NULL!	#NULL!	#NULL!	#NULL!	#NULL!	#NULL!	#NULL!		2
3	1	1	1	1	950	0	#NULL!	0	#NULL!	1	1	3	1	2	0	0	1	1	2	2	2	2	2	2		#NULL!	#NULL!	#NULL!	#NULL!	#NULL!	#NULL!		1	2	#NULL!	#NULL!	#NULL!	#NULL!	#NULL!	#NULL!	#NULL!	#NULL!	#NULL!	#NULL!	#NULL!	#NULL!	#NULL!		2
1	1	1	4	1	1300	0	#NULL!	0	#NULL!	1	1	2	1	2	0	0	1	1	2	1	2	2	2	2		#NULL!	#NULL!	#NULL!	#NULL!	#NULL!	#NULL!		1	1	1	2	1	1	2	2	#NULL!	2	#NULL!	#NULL!	#NULL!	#NULL!	#NULL!		2
3	2	2	1	2	1600	1	3	1	2	1	1	3	1	2	1	1	1	2	1	2	2	2	2	2		#NULL!	#NULL!	#NULL!	#NULL!	#NULL!	#NULL!		1	1	1	3	1	1	2	2	#NULL!	1	2	2	1	2	2		1
2	1	1	1	1	850	1	1	0	#NULL!	1	1	2	1	2	0	0	1	1	#NULL!	1	#NULL!	#NULL!	#NULL!	#NULL!		#NULL!	#NULL!	#NULL!	#NULL!	#NULL!	#NULL!		2	2	#NULL!	#NULL!	#NULL!	#NULL!	#NULL!	#NULL!	#NULL!	#NULL!	#NULL!	#NULL!	#NULL!	#NULL!	#NULL!		2
1	1	1	2	1	800	0	#NULL!	0	#NULL!	1	0	1	1	#NULL!	#NULL!	#NULL!	#NULL!	#NULL!	#NULL!	#NULL!	#NULL!	#NULL!	#NULL!	#NULL!		#NULL!	#NULL!	#NULL!	#NULL!	#NULL!	#NULL!		#NULL!	2	#NULL!	#NULL!	#NULL!	#NULL!	#NULL!	#NULL!	#NULL!	#NULL!	#NULL!	#NULL!	#NULL!	#NULL!	#NULL!		1
2	1	1	1	1	0	0	#NULL!	0	#NULL!	1	1	3	1	3	0	0	1	1	1	#NULL!	#NULL!	#NULL!	#NULL!	#NULL!		#NULL!	#NULL!	#NULL!	#NULL!	#NULL!	#NULL!		1	2	#NULL!	#NULL!	#NULL!	#NULL!	#NULL!	#NULL!	#NULL!	#NULL!	#NULL!	#NULL!	#NULL!	#NULL!	#NULL!		2
1	2	1	4	3	0	0	#NULL!	1	2	1	0	1	1	#NULL!	#NULL!	#NULL!	#NULL!	#NULL!	#NULL!	#NULL!	#NULL!	#NULL!	#NULL!	#NULL!		#NULL!	#NULL!	#NULL!	#NULL!	#NULL!	#NULL!		#NULL!	2	#NULL!	#NULL!	#NULL!	#NULL!	#NULL!	#NULL!	#NULL!	#NULL!	#NULL!	#NULL!	#NULL!	#NULL!	#NULL!		2
1	1	2	4	2	1000	0	#NULL!	0	#NULL!	1	1	1	1	#NULL!	#NULL!	#NULL!	#NULL!	#NULL!	#NULL!	#NULL!	#NULL!	#NULL!	#NULL!	#NULL!		#NULL!	#NULL!	#NULL!	#NULL!	#NULL!	#NULL!		#NULL!	2	#NULL!	#NULL!	#NULL!	#NULL!	#NULL!	#NULL!	#NULL!	#NULL!	#NULL!	#NULL!	#NULL!	#NULL!	#NULL!		2
3	1	1	1	1	1250	0	#NULL!	0	#NULL!	1	1	3	1	3	1	1	1	#NULL!	#NULL!	#NULL!	1	#NULL!	#NULL!	#NULL!		#NULL!	#NULL!	#NULL!	#NULL!	#NULL!	#NULL!		1	2	#NULL!	#NULL!	#NULL!	#NULL!	#NULL!	#NULL!	#NULL!	#NULL!	#NULL!	#NULL!	#NULL!	#NULL!	#NULL!		2
2	1	1	1	2	1300	1	2	1	2	1	1	2	1	1	0	0	#NULL!	1	1	1	1	#NULL!	#NULL!	#NULL!		#NULL!	#NULL!	#NULL!	#NULL!	#NULL!	#NULL!		2	1	1	2	1	#NULL!	#NULL!	#NULL!	#NULL!	1	1	1	1	#NULL!	#NULL!		1
2	1	1	2	1	950	0	#NULL!	0	#NULL!	1	0	3	1	2	1	1	1	1	#NULL!	#NULL!	#NULL!	1	#NULL!	#NULL!		#NULL!	#NULL!	#NULL!	#NULL!	#NULL!	#NULL!		1	1	1	2	1	1	#NULL!	#NULL!	#NULL!	1	1	#NULL!	1	1	#NULL!		1
2	1	1	2	3	1500	1	2	1	2	1	1	3	1	2	1	1	2	#NULL!	#NULL!	#NULL!	#NULL!	#NULL!	#NULL!	#NULL!		1	1	1	#NULL!	#NULL!	#NULL!		2	1	1	2	1	1	1	#NULL!	#NULL!	1	#NULL!	#NULL!	1	#NULL!	#NULL!		1
2	1	1	4	4	1200	1	1	1	1	1	1	1	1	#NULL!	#NULL!	#NULL!	#NULL!	#NULL!	#NULL!	#NULL!	#NULL!	#NULL!	#NULL!	#NULL!		#NULL!	#NULL!	#NULL!	#NULL!	#NULL!	#NULL!		#NULL!	1	0	#NULL!	#NULL!	#NULL!	#NULL!	#NULL!	#NULL!	#NULL!	#NULL!	#NULL!	#NULL!	#NULL!	#NULL!		2
1	1	1	1	2	600	1	2	1	1	1	0	2	1	2	1	0	2	#NULL!	#NULL!	#NULL!	#NULL!	#NULL!	#NULL!	#NULL!		2	1	2	2	1	1		2	1	1	2	1	1	2	2	#NULL!	1	2	1	0	1	2		1
3	1	1	2	1	1500	0	#NULL!	0	#NULL!	1	0	3	1	2	1	0	1	1	2	2	1	2	2	2		#NULL!	#NULL!	#NULL!	#NULL!	#NULL!	#NULL!		1	2	#NULL!	#NULL!	#NULL!	#NULL!	#NULL!	#NULL!	#NULL!	#NULL!	#NULL!	#NULL!	#NULL!	#NULL!	#NULL!		2
1	2	2	6	1	400	0	#NULL!	0	#NULL!	1	1	1	1	#NULL!	#NULL!	#NULL!	#NULL!	#NULL!	#NULL!	#NULL!	#NULL!	#NULL!	#NULL!	#NULL!		#NULL!	#NULL!	#NULL!	#NULL!	#NULL!	#NULL!		#NULL!	2	0	#NULL!	#NULL!	#NULL!	#NULL!	#NULL!	#NULL!	#NULL!	#NULL!	#NULL!	#NULL!	#NULL!	#NULL!		2
2	1	1	1	1	850	0	#NULL!	0	#NULL!	1	1	1	1	#NULL!	#NULL!	#NULL!	#NULL!	#NULL!	#NULL!	#NULL!	#NULL!	#NULL!	#NULL!	#NULL!		#NULL!	#NULL!	#NULL!	#NULL!	#NULL!	#NULL!		#NULL!	2	#NULL!	#NULL!	#NULL!	#NULL!	#NULL!	#NULL!	#NULL!	#NULL!	#NULL!	#NULL!	#NULL!	#NULL!	#NULL!		2
2	1	1	1	1	1000	0	#NULL!	0	1	1	1	2	1	1	0	0	1	1	2	2	1	2	1	2		#NULL!	#NULL!	#NULL!	#NULL!	#NULL!	#NULL!		2	1	1	2	1	1	2	2	#NULL!	1	1	1	1	1	2		1
1	1	1	1	1	1400	0	#NULL!	0	#NULL!	1	0	2	1	2	0	0	1	1	1	2	1	2	2	2		#NULL!	#NULL!	#NULL!	#NULL!	#NULL!	#NULL!		1	1	1	2	1	1	2	2	#NULL!	2	#NULL!	#NULL!	#NULL!	#NULL!	#NULL!		1
1	1	1	1	3	1300	1	2	1	1	1	1	2	1	2	0	0	2	#NULL!	#NULL!	#NULL!	#NULL!	#NULL!	#NULL!	#NULL!		2	1	2	1	2	2		2	1	0	#NULL!	#NULL!	#NULL!	#NULL!	#NULL!	#NULL!	#NULL!	#NULL!	#NULL!	#NULL!	#NULL!	#NULL!		2
3	3	1	3	1	1600	0	#NULL!	0	#NULL!	1	1	2	1	1	0	0	1	1	2	2	1	2	2	2		#NULL!	#NULL!	#NULL!	#NULL!	#NULL!	#NULL!		1	1	1	1	1	1	2	1	#NULL!	1	1	1	1	1	2		1
1	1	1	1	1	2000	0	#NULL!	0	#NULL!	1	1	2	1	1	0	0	1	2	2	2	1	1	2	2		#NULL!	#NULL!	#NULL!	#NULL!	#NULL!	#NULL!		1	1	0	#NULL!	#NULL!	#NULL!	#NULL!	#NULL!	#NULL!	#NULL!	#NULL!	#NULL!	#NULL!	#NULL!	#NULL!		2
2	1	1	1	1	2500	0	#NULL!	0	#NULL!	1	1	3	1	2	0	0	1	1	1	2	2	2	2	1		#NULL!	#NULL!	#NULL!	#NULL!	#NULL!	#NULL!		1	1	1	3	1	1	2	2	#NULL!	1	1	1	1	1	2		1
1	2	2	4	1	350	0	#NULL!	0	#NULL!	1	0	2	1	1	0	0	1	1	2	2	1	2	1	2		#NULL!	#NULL!	#NULL!	#NULL!	#NULL!	#NULL!		1	1	1	1	1	1	2	2	#NULL!	2	#NULL!	#NULL!	#NULL!	#NULL!	#NULL!		1
1	1	1	1	1	800	0	#NULL!	1	2	1	1	2	1	2	0	0	1	1	2	1	1	2	2	2		#NULL!	#NULL!	#NULL!	#NULL!	#NULL!	#NULL!		1	1	#NULL!	#NULL!	#NULL!	#NULL!	#NULL!	#NULL!	#NULL!	#NULL!	#NULL!	#NULL!	#NULL!	#NULL!	#NULL!		1
1	1	1	1	1	550	0	#NULL!	1	3	1	1	3	1	2	1	1	1	1	2	2	1	2	2	2		#NULL!	#NULL!	#NULL!	#NULL!	#NULL!	#NULL!		1	1	1	2	1	1	2	2	#NULL!	1	1	1	1	2	2		1
2	1	1	1	1	1000	1	1	1	1	1	1	3	1	1	1	1	1	1	2	1	1	2	2	2		#NULL!	#NULL!	#NULL!	#NULL!	#NULL!	#NULL!		1	1	1	2	1	1	1	2	#NULL!	1	1	1	1	1	2		1
2	1	1	2	3	1000	0	#NULL!	1	1	1	0	2	1	1	1	0	2	#NULL!	#NULL!	#NULL!	#NULL!	#NULL!	#NULL!	#NULL!		2	2	1	2	2	2		2	1	1	2	2	2	1	2	#NULL!	1	2	1	0	2	1		1
1	1	1	1	3	1000	0	#NULL!	1	2	1	0	2	1	1	1	0	1	1	2	2	2	2	2	2		#NULL!	#NULL!	#NULL!	#NULL!	#NULL!	#NULL!		1	1	1	1	2	1	2	2	#NULL!	1	2	2	0	2	1		1
2	1	1	2	4	1500	1	2	1	1	1	0	2	1	2	0	0	1	1	2	2	2	2	2	2		#NULL!	#NULL!	#NULL!	#NULL!	#NULL!	#NULL!		1	1	1	3	2	2	1	2	#NULL!	1	2	2	1	2	1		1
2	1	1	1	3	1000	0	#NULL!	1	1	1	1	2	1	1	0	0	2	#NULL!	#NULL!	#NULL!	#NULL!	#NULL!	#NULL!	#NULL!		1	2	2	2	2	2		1	1	1	2	2	1	2	2	#NULL!	1	2	2	0	2	1		1
2	1	1	3	3	700	0	#NULL!	1	1	1	0	2	1	1	0	1	2	#NULL!	#NULL!	#NULL!	#NULL!	#NULL!	#NULL!	#NULL!		2	1	2	2	2	2		2	1	1	2	1	2	2	2	#NULL!	1	2	1	0	2	1		1
2	1	1	1	3	1500	0	#NULL!	1	1	1	1	2	1	2	0	0	2	#NULL!	#NULL!	#NULL!	#NULL!	#NULL!	#NULL!	#NULL!		1	2	1	2	2	2		2	1	1	2	2	1	2	2	#NULL!	1	1	1	0	2	2		1
1	1	1	4	3	300	1	1	1	1	1	1	3	1	2	1	0	2	#NULL!	#NULL!	#NULL!	#NULL!	#NULL!	#NULL!	#NULL!		2	1	1	2	2	2		2	1	1	2	2	1	2	2	#NULL!	1	2	1	1	2	1		1
2	1	1	6	2	1900	0	#NULL!	1	1	1	1	2	1	1	0	0	2	#NULL!	#NULL!	#NULL!	#NULL!	#NULL!	#NULL!	#NULL!		2	1	2	2	1	2		3	1	1	2	2	1	2	2	#NULL!	1	2	1	0	2	1		1
2	1	1	1	3	1200	0	#NULL!	0	#NULL!	1	0	2	1	2	0	0	1	1	2	2	2	2	2	2		#NULL!	#NULL!	#NULL!	#NULL!	#NULL!	#NULL!		1	1	1	2	2	1	1	2	#NULL!	1	2	1	0	2	1		2
1	1	1	4	3	1300	1	2	1	1	1	1	2	1	1	0	0	2	#NULL!	#NULL!	#NULL!	#NULL!	#NULL!	#NULL!	#NULL!		2	2	1	2	2	2		2	1	1	2	2	1	2	2	#NULL!	1	2	1	1	2	1		1
1	1	1	1	3	0	1	2	1	1	1	0	2	1	1	1	0	2	#NULL!	#NULL!	#NULL!	#NULL!	#NULL!	#NULL!	#NULL!		1	2	2	2	2	2		2	1	1	2	1	2	2	2	#NULL!	1	2	1	0	2	1		1
2	1	2	3	3	1700	0	#NULL!	1	1	1	1	3	1	2	0	0	2	#NULL!	#NULL!	#NULL!	#NULL!	#NULL!	#NULL!	#NULL!		1	2	1	2	2	2		2	1	1	2	1	2	2	2	#NULL!	1	1	1	1	1	2		1
2	1	1	1	3	400	1	2	1	1	1	0	3	1	2	0	1	2	#NULL!	#NULL!	#NULL!	#NULL!	#NULL!	#NULL!	#NULL!		2	1	2	1	2	2		2	1	1	2	2	1	2	2	#NULL!	1	2	1	1	2	1		1
2	1	1	1	4	1000	0	#NULL!	1	1	1	0	3	1	3	1	0	2	#NULL!	#NULL!	#NULL!	#NULL!	#NULL!	#NULL!	#NULL!		2	1	2	2	2	2		2	1	1	2	1	2	2	2	#NULL!	1	2	2	1	2	1		1
1	1	1	1	3	1300	1	2	1	1	1	0	3	1	2	0	0	2	#NULL!	#NULL!	#NULL!	#NULL!	#NULL!	#NULL!	#NULL!		1	2	2	2	2	2		2	1	1	3	2	1	2	2	#NULL!	1	2	1	1	2	1		1
1	1	1	1	1	1000	0	#NULL!	1	1	1	0	3	1	2	1	0	2	#NULL!	#NULL!	#NULL!	#NULL!	#NULL!	#NULL!	#NULL!		1	2	2	2	2	2		2	1	1	2	2	1	2	2	#NULL!	1	2	1	1	2	1		1
2	1	1	1	3	2000	0	#NULL!	1	1	1	0	2	1	1	1	0	2	#NULL!	#NULL!	#NULL!	#NULL!	#NULL!	#NULL!	#NULL!		2	1	2	2	2	2		2	1	1	2	2	1	2	2	#NULL!	2	#NULL!	#NULL!	#NULL!	#NULL!	#NULL!		1
2	1	1	5	5	700	1	1	1	1	1	1	2	1	2	0	0	2	#NULL!	#NULL!	#NULL!	#NULL!	#NULL!	#NULL!	#NULL!		2	1	1	2	2	2		2	2	#NULL!	#NULL!	#NULL!	#NULL!	#NULL!	#NULL!	#NULL!	#NULL!	#NULL!	#NULL!	#NULL!	#NULL!	#NULL!		2
2	1	1	1	4	300	0	#NULL!	1	2	1	0	1	1	#NULL!	#NULL!	#NULL!	#NULL!	#NULL!	#NULL!	#NULL!	#NULL!	#NULL!	#NULL!	#NULL!		#NULL!	#NULL!	#NULL!	#NULL!	#NULL!	#NULL!		#NULL!	1	1	2	2	2	2	2	#NULL!	1	2	2	1	2	1		1
1	1	1	1	3	1400	0	#NULL!	1	1	1	0	2	1	2	0	0	2	#NULL!	#NULL!	#NULL!	#NULL!	#NULL!	#NULL!	#NULL!		2	1	1	2	2	2		2	1	1	2	1	1	2	2	#NULL!	1	2	1	1	2	1		1
1	1	1	1	3	600	1	1	1	1	1	1	2	1	1	0	0	1	2	2	2	2	2	1	2		#NULL!	#NULL!	#NULL!	#NULL!	#NULL!	#NULL!		1	1	0	#NULL!	#NULL!	#NULL!	#NULL!	#NULL!	#NULL!	#NULL!	#NULL!	#NULL!	#NULL!	#NULL!	#NULL!		1
1	1	1	1	2	1400	1	2	1	1	1	1	3	1	2	0	0	2	#NULL!	#NULL!	#NULL!	#NULL!	#NULL!	#NULL!	#NULL!		1	2	2	2	2	2		2	1	0	#NULL!	#NULL!	#NULL!	#NULL!	#NULL!	#NULL!	#NULL!	#NULL!	#NULL!	#NULL!	#NULL!	#NULL!		1
1	1	1	1	5	850	0	#NULL!	1	1	1	1	1	1	#NULL!	#NULL!	#NULL!	#NULL!	#NULL!	#NULL!	#NULL!	#NULL!	#NULL!	#NULL!	#NULL!		#NULL!	#NULL!	#NULL!	#NULL!	#NULL!	#NULL!		#NULL!	1	1	1	1	2	2	2	#NULL!	1	2	1	0	2	1		1
2	1	1	1	3	550	1	2	1	1	1	1	2	1	1	0	0	2	#NULL!	#NULL!	#NULL!	#NULL!	#NULL!	#NULL!	#NULL!		2	1	2	2	2	2		2	1	1	2	1	1	1	1	#NULL!	1	2	1	0	2	1		1
2	1	1	1	3	1500	0	#NULL!	1	1	1	1	2	1	1	0	0	2	#NULL!	#NULL!	#NULL!	#NULL!	#NULL!	#NULL!	#NULL!		2	1	2	2	2	2		2	1	1	2	2	1	2	2	#NULL!	1	2	1	0	2	1		1
1	1	1	1	3	1300	1	3	1	3	1	1	3	1	2	0	1	2	#NULL!	#NULL!	#NULL!	#NULL!	#NULL!	#NULL!	#NULL!		2	1	1	2	2	2		2	1	1	2	2	1	2	2	#NULL!	1	2	1	0	2	1		1
2	1	1	1	2	850	1	2	1	2	1	1	2	1	2	0	0	2	#NULL!	#NULL!	#NULL!	#NULL!	#NULL!	#NULL!	#NULL!		2	2	1	2	2	2		2	1	1	2	2	1	2	2	#NULL!	1	2	1	0	2	1		1
1	1	1	3	5	2000	1	2	1	1	1	1	2	1	2	1	0	2	#NULL!	#NULL!	#NULL!	#NULL!	#NULL!	#NULL!	#NULL!		2	1	2	2	2	2		2	1	0	#NULL!	#NULL!	#NULL!	#NULL!	#NULL!	#NULL!	#NULL!	#NULL!	#NULL!	#NULL!	#NULL!	#NULL!		1
1	1	1	1	1	600	0	#NULL!	1	1	1	1	2	1	2	0	0	1	1	2	2	2	2	1	2		#NULL!	#NULL!	#NULL!	#NULL!	#NULL!	#NULL!		1	1	1	2	2	1	2	2	#NULL!	1	2	1	1	2	1		1
1	1	1	1	2	600	1	1	1	1	1	1	2	1	1	1	0	2	#NULL!	#NULL!	#NULL!	#NULL!	#NULL!	#NULL!	#NULL!		2	1	1	2	2	2		1	1	1	2	2	1	2	1	#NULL!	1	2	1	0	2	1		1
1	1	1	1	1	1500	0	#NULL!	0	#NULL!	1	0	3	1	3	0	1	2	#NULL!	#NULL!	#NULL!	#NULL!	#NULL!	#NULL!	#NULL!		1	2	2	2	2	2		1	1	0	#NULL!	#NULL!	#NULL!	#NULL!	#NULL!	#NULL!	#NULL!	#NULL!	#NULL!	#NULL!	#NULL!	#NULL!		1
2	1	1	6	5	400	0	#NULL!	1	1	1	0	3	1	2	1	0	2	#NULL!	#NULL!	#NULL!	#NULL!	#NULL!	#NULL!	#NULL!		1	2	2	2	2	2		3	1	1	2	2	2	1	2	#NULL!	1	2	2	0	2	1		1
2	1	1	1	2	650	1	1	1	1	1	0	2	1	2	0	0	2	#NULL!	#NULL!	#NULL!	#NULL!	#NULL!	#NULL!	#NULL!		2	1	2	2	2	2		2	1	1	2	1	1	2	1	#NULL!	1	2	1	0	2	1		1
2	1	1	1	3	700	1	2	1	1	1	0	3	1	3	0	0	2	#NULL!	#NULL!	#NULL!	#NULL!	#NULL!	#NULL!	#NULL!		2	1	2	2	2	2		2	1	1	2	2	1	2	2	#NULL!	1	2	1	0	2	1		1
1	1	1	1	3	200	1	2	1	1	1	0	3	1	2	1	1	2	#NULL!	#NULL!	#NULL!	#NULL!	#NULL!	#NULL!	#NULL!		1	2	2	2	2	2		2	1	1	2	2	1	2	2	#NULL!	1	2	1	1	2	1		1
1	1	1	1	3	1400	1	1	1	1	1	0	2	1	1	0	0	2	#NULL!	#NULL!	#NULL!	#NULL!	#NULL!	#NULL!	#NULL!		1	2	2	2	2	2		2	1	1	2	1	2	1	2	#NULL!	1	2	1	0	2	1		1
1	1	1	1	3	600	1	2	1	1	1	1	3	1	3	0	0	1	1	2	2	1	1	2	2		#NULL!	#NULL!	#NULL!	#NULL!	#NULL!	#NULL!		1	1	0	#NULL!	#NULL!	#NULL!	#NULL!	#NULL!	#NULL!	#NULL!	#NULL!	#NULL!	#NULL!	#NULL!	#NULL!		1
1	1	1	1	3	1000	0	#NULL!	1	1	1	1	3	1	3	0	1	1	1	2	2	1	2	2	2		#NULL!	#NULL!	#NULL!	#NULL!	#NULL!	#NULL!		1	1	1	1	2	1	2	2	#NULL!	1	2	1	0	2	1		1
2	1	1	1	2	400	1	2	1	1	1	1	3	1	2	0	0	1	2	2	2	1	2	2	1		#NULL!	#NULL!	#NULL!	#NULL!	#NULL!	#NULL!		1	1	1	2	2	1	2	2	#NULL!	1	2	1	0	2	1		1
1	1	1	1	3	4000	1	1	1	1	1	1	2	1	2	0	0	2	#NULL!	#NULL!	#NULL!	#NULL!	#NULL!	#NULL!	#NULL!		2	1	2	2	2	2		3	1	1	2	2	1	2	2	#NULL!	1	2	1	0	2	1		1
1	1	1	1	3	1400	0	#NULL!	1	1	1	1	2	1	2	0	0	1	1	2	2	1	2	2	1		#NULL!	#NULL!	#NULL!	#NULL!	#NULL!	#NULL!		1	1	1	2	2	1	2	2	#NULL!	1	2	1	0	2	1		1
2	1	1	1	3	1000	0	#NULL!	1	1	1	1	2	1	2	0	0	1	1	2	2	1	2	2	1		#NULL!	#NULL!	#NULL!	#NULL!	#NULL!	#NULL!		1	1	1	1	2	1	1	2	#NULL!	1	1	2	0	2	1		1
1	1	1	1	3	1500	0	#NULL!	1	1	1	0	3	1	1	1	0	2	#NULL!	#NULL!	#NULL!	#NULL!	#NULL!	#NULL!	#NULL!		2	2	1	2	2	2		2	1	1	3	2	2	1	2	#NULL!	1	1	1	0	2	1		1
2	1	1	1	4	1000	0	#NULL!	1	1	1	1	2	1	1	0	0	1	1	2	2	1	2	2	1		#NULL!	#NULL!	#NULL!	#NULL!	#NULL!	#NULL!		1	1	0	#NULL!	#NULL!	#NULL!	#NULL!	#NULL!	#NULL!	#NULL!	#NULL!	#NULL!	#NULL!	#NULL!	#NULL!		2
2	1	1	6	4	1400	0	#NULL!	1	1	1	1	2	1	2	0	0	2	#NULL!	#NULL!	#NULL!	#NULL!	#NULL!	#NULL!	#NULL!		1	2	2	2	2	2		2	1	1	2	1	2	2	2	#NULL!	1	2	1	0	1	1		1
2	1	2	2	2	1500	0	#NULL!	1	2	1	0	3	1	1	1	0	2	#NULL!	#NULL!	#NULL!	#NULL!	#NULL!	#NULL!	#NULL!		2	2	1	2	2	2		2	1	1	3	2	2	1	2	#NULL!	1	1	1	0	2	1		1
2	1	2	3	5	1000	0	#NULL!	1	1	1	1	2	1	1	0	0	2	#NULL!	#NULL!	#NULL!	#NULL!	#NULL!	#NULL!	#NULL!		2	1	2	2	2	2		2	1	1	2	2	1	1	2	#NULL!	1	2	1	1	1	1		2
2	1	1	1	4	1200	0	#NULL!	1	1	1	1	2	1	1	0	0	2	#NULL!	#NULL!	#NULL!	#NULL!	#NULL!	#NULL!	#NULL!		1	2	2	2	2	2		2	1	1	1	1	2	2	2	#NULL!	1	2	1	0	1	2		2
1	1	2	3	3	3000	0	#NULL!	1	1	1	1	2	1	1	0	0	1	1	2	2	1	2	2	1		#NULL!	#NULL!	#NULL!	#NULL!	#NULL!	#NULL!		1	1	1	2	2	1	1	2	#NULL!	1	2	1	0	2	1		2
1	1	1	1	4	500	0	#NULL!	1	1	1	0	2	1	1	1	0	1	2	1	2	2	2	2	2		#NULL!	#NULL!	#NULL!	#NULL!	#NULL!	#NULL!		1	1	1	3	1	2	2	2	#NULL!	1	2	2	1	2	1		1
2	1	1	1	4	300	0	#NULL!	1	1	1	1	2	1	1	0	0	2	#NULL!	#NULL!	#NULL!	#NULL!	#NULL!	#NULL!	#NULL!		1	2	2	2	2	2		3	1	1	1	1	2	2	2	#NULL!	1	2	1	0	1	2		2
2	1	1	1	4	1000	1	2	1	1	1	0	2	1	1	0	0	1	1	2	2	2	2	2	2		#NULL!	#NULL!	#NULL!	#NULL!	#NULL!	#NULL!		1	1	1	2	2	2	1	2	#NULL!	1	2	1	0	2	1		2
1	1	1	1	3	0	0	#NULL!	0	#NULL!	1	1	3	1	1	1	0	1	2	2	2	1	2	2	2		#NULL!	#NULL!	#NULL!	#NULL!	#NULL!	#NULL!		1	1	1	2	2	2	1	2	#NULL!	1	2	1	0	2	1		1
2	1	1	1	4	1000	1	1	1	1	1	0	2	1	1	0	1	1	1	2	2	2	2	2	2		#NULL!	#NULL!	#NULL!	#NULL!	#NULL!	#NULL!		1	1	1	3	2	2	1	2	#NULL!	1	2	1	0	2	1		2
2	1	1	1	3	1600	1	2	1	2	1	0	2	1	1	0	0	1	1	2	2	2	2	1	2		#NULL!	#NULL!	#NULL!	#NULL!	#NULL!	#NULL!		1	1	1	2	2	2	1	2	#NULL!	1	2	1	1	2	1		2
2	1	2	1	3	1500	0	#NULL!	1	1	1	1	2	1	1	0	0	2	#NULL!	#NULL!	#NULL!	#NULL!	#NULL!	#NULL!	#NULL!		2	1	2	2	2	2		2	1	1	2	2	1	1	2	#NULL!	1	2	1	0	2	1		2
2	1	1	3	4	1000	1	2	1	1	1	0	2	1	1	0	0	2	#NULL!	#NULL!	#NULL!	#NULL!	#NULL!	#NULL!	#NULL!		1	2	2	2	2	2		2	1	1	1	1	2	2	2	#NULL!	1	2	1	0	2	1		2
1	1	1	1	4	0	0	#NULL!	0	#NULL!	1	0	1	1	#NULL!	#NULL!	#NULL!	#NULL!	#NULL!	#NULL!	#NULL!	#NULL!	#NULL!	#NULL!	#NULL!		#NULL!	#NULL!	#NULL!	#NULL!	#NULL!	#NULL!		#NULL!	1	0	#NULL!	#NULL!	#NULL!	#NULL!	#NULL!	#NULL!	#NULL!	#NULL!	#NULL!	#NULL!	#NULL!	#NULL!		2
1	1	1	1	4	0	0	#NULL!	0	#NULL!	1	0	1	1	#NULL!	#NULL!	#NULL!	1	#NULL!	#NULL!	#NULL!	#NULL!	#NULL!	#NULL!	#NULL!		#NULL!	#NULL!	#NULL!	#NULL!	#NULL!	#NULL!		#NULL!	1	1	3	2	2	1	2	#NULL!	1	2	2	0	2	1		2
1	1	1	1	3	3000	0	#NULL!	1	1	1	0	2	1	2	0	0	2	#NULL!	#NULL!	#NULL!	#NULL!	#NULL!	#NULL!	#NULL!		1	2	2	2	2	2		2	1	1	1	1	2	2	2	#NULL!	1	1	2	0	2	1		1
1	1	1	3	3	0	0	#NULL!	0	#NULL!	1	0	3	1	2	0	0	2	#NULL!	#NULL!	#NULL!	#NULL!	#NULL!	#NULL!	#NULL!		2	2	2	2	2	1		2	1	1	3	1	2	1	2	#NULL!	1	2	2	0	2	1	use of fluids	2
1	1	1	3	5	0	0	#NULL!	1	2	1	1	2	1	2	0	0	1	2	2	2	1	2	2	2		#NULL!	#NULL!	#NULL!	#NULL!	#NULL!	#NULL!		1	1	1	2	1	2	2	2	#NULL!	1	1	1	1	2	1		1
1	1	1	1	1	1500	0	#NULL!	1	1	1	0	1	1	#NULL!	#NULL!	#NULL!	#NULL!	#NULL!	#NULL!	#NULL!	#NULL!	#NULL!	#NULL!	#NULL!		#NULL!	#NULL!	#NULL!	#NULL!	#NULL!	#NULL!		#NULL!	1	1	3	1	1	1	2	#NULL!	1	2	1	0	2	1		2
1	1	1	6	4	1500	0	#NULL!	1	2	1	0	1	1	#NULL!	#NULL!	#NULL!	#NULL!	#NULL!	#NULL!	#NULL!	#NULL!	#NULL!	#NULL!	#NULL!		#NULL!	#NULL!	#NULL!	#NULL!	#NULL!	#NULL!		#NULL!	1	1	2	2	2	1	2	#NULL!	1	2	1	0	2	1		2
1	1	1	1	3	1600	1	2	1	2	1	0	2	1	1	0	0	1	1	2	2	2	2	1	2		#NULL!	#NULL!	#NULL!	#NULL!	#NULL!	#NULL!		1	1	1	2	2	2	1	2	#NULL!	1	2	1	0	2	1		2
1	1	1	1	3	1400	0	#NULL!	1	1	1	0	2	1	1	0	0	2	#NULL!	#NULL!	#NULL!	#NULL!	#NULL!	#NULL!	#NULL!		1	2	2	2	2	2		2	1	1	2	2	2	1	2	#NULL!	1	2	2	0	2	1		2
1	1	1	1	4	0	0	#NULL!	0	#NULL!	1	1	1	1	#NULL!	#NULL!	#NULL!	#NULL!	1	#NULL!	#NULL!	#NULL!	#NULL!	#NULL!	#NULL!		#NULL!	#NULL!	#NULL!	#NULL!	#NULL!	#NULL!		#NULL!	1	1	3	2	2	1	2	#NULL!	1	2	1	0	2	1		2
1	1	1	1	3	1200	0	#NULL!	0	#NULL!	1	1	2	1	2	0	1	2	#NULL!	#NULL!	#NULL!	#NULL!	#NULL!	#NULL!	#NULL!		1	2	2	2	2	2		2	1	1	2	1	2	2	2	#NULL!	1	2	1	0	2	1		2
1	1	1	4	4	800	0	#NULL!	1	2	1	0	2	1	1	0	0	1	1	2	2	2	2	2	2		#NULL!	#NULL!	#NULL!	#NULL!	#NULL!	#NULL!		1	1	0	#NULL!	#NULL!	#NULL!	#NULL!	#NULL!	#NULL!	#NULL!	#NULL!	#NULL!	#NULL!	#NULL!	#NULL!		2
1	1	1	3	1	1300	0	#NULL!	0	#NULL!	1	0	3	1	1	1	1	1	2	2	2	1	2	2	2		#NULL!	#NULL!	#NULL!	#NULL!	#NULL!	#NULL!		1	1	1	1	2	2	1	2	#NULL!	1	2	2	0	2	1		1
1	1	1	5	5	400	1	1	1	1	1	1	2	1	1	1	0	2	#NULL!	#NULL!	#NULL!	#NULL!	#NULL!	#NULL!	#NULL!		2	2	2	1	2	2		2	1	1	2	1	2	2	2	#NULL!	1	2	2	1	2	1		2
1	1	1	1	3	1300	1	2	1	1	1	0	3	1	2	1	1	2	#NULL!	#NULL!	#NULL!	#NULL!	#NULL!	#NULL!	#NULL!		1	2	2	1	2	2		1	1	1	2	1	2	2	2	#NULL!	1	2	1	0	2	1		1
1	1	2	1	3	500	1	2	1	2	1	0	2	1	1	0	0	1	2	2	2	1	2	2	2		#NULL!	#NULL!	#NULL!	#NULL!	#NULL!	#NULL!		1	1	1	2	2	1	1	2	#NULL!	1	2	1	0	2	1		2
1	1	1	6	3	300	0	#NULL!	0	#NULL!	1	0	1	1	#NULL!	#NULL!	#NULL!	1	#NULL!	#NULL!	#NULL!	#NULL!	#NULL!	#NULL!	#NULL!		#NULL!	#NULL!	#NULL!	#NULL!	#NULL!	#NULL!		1	1	0	#NULL!	#NULL!	#NULL!	#NULL!	#NULL!	#NULL!	#NULL!	#NULL!	#NULL!	#NULL!	#NULL!	#NULL!		2
1	1	1	1	1	1500	0	#NULL!	1	1	1	1	2	1	2	0	0	1	2	2	2	1	2	2	2		#NULL!	#NULL!	#NULL!	#NULL!	#NULL!	#NULL!		1	1	#NULL!	2	2	2	1	2	#NULL!	1	2	1	0	2	1		1
1	1	1	1	3	1000	0	#NULL!	1	1	1	1	2	1	1	1	0	2	#NULL!	#NULL!	#NULL!	#NULL!	#NULL!	#NULL!	#NULL!		2	1	2	2	2	2		2	1	1	3	2	1	1	2	#NULL!	1	1	1	1	2	1		1
1	1	1	3	3	1150	0	#NULL!	1	2	1	0	2	1	1	0	0	1	2	2	2	1	2	2	2		#NULL!	#NULL!	#NULL!	#NULL!	#NULL!	#NULL!		1	1	1	2	2	1	2	2	#NULL!	1	2	1	0	2	1		1
1	1	1	6	1	500	0	#NULL!	1	2	1	0	2	1	1	0	0	2	#NULL!	#NULL!	#NULL!	#NULL!	#NULL!	#NULL!	#NULL!		1	2	2	2	2	2		2	1	1	2	2	1	2	2	#NULL!	1	2	1	0	2	1		2
2	1	1	1	3	500	0	#NULL!	1	1	1	0	2	1	1	1	0	1	2	2	2	1	2	2	2		#NULL!	#NULL!	#NULL!	#NULL!	#NULL!	#NULL!		1	1	1	2	2	1	2	2	#NULL!	1	2	1	0	2	1	do not use a motorcy	1
1	1	1	1	3	500	1	2	1	2	1	0	2	1	1	0	0	2	#NULL!	#NULL!	#NULL!	#NULL!	#NULL!	#NULL!	#NULL!		2	1	2	2	2	2		2	1	1	2	2	1	1	2	#NULL!	1	2	1	0	2	1		2
2	1	1	2	3	500	0	#NULL!	1	1	1	0	2	1	1	0	0	1	2	2	2	1	2	2	2		#NULL!	#NULL!	#NULL!	#NULL!	#NULL!	#NULL!		1	1	1	2	2	2	1	2	#NULL!	1	2	1	0	2	1	don't lift heevy obj	1
1	1	2	2	3	2000	0	#NULL!	0	#NULL!	1	1	2	1	1	0	0	1	2	2	2	1	2	2	2		#NULL!	#NULL!	#NULL!	#NULL!	#NULL!	#NULL!		1	1	1	2	2	1	2	2	#NULL!	1	2	1	0	2	1		2
1	1	1	2	3	300	0	#NULL!	0	#NULL!	1	1	3	1	2	0	1	2	#NULL!	#NULL!	#NULL!	#NULL!	#NULL!	#NULL!	#NULL!		1	2	2	2	2	2		2	1	1	1	1	2	2	2	#NULL!	1	2	1	0	2	1		1
1	1	1	2	2	1000	0	#NULL!	1	2	1	1	2	1	1	0	0	2	#NULL!	#NULL!	#NULL!	#NULL!	#NULL!	#NULL!	#NULL!		1	2	2	2	2	2		3	1	#NULL!	#NULL!	#NULL!	#NULL!	#NULL!	#NULL!	#NULL!	#NULL!	#NULL!	#NULL!	#NULL!	#NULL!	#NULL!		2
1	1	1	2	4	250	0	#NULL!	1	2	1	1	2	1	2	0	0	1	2	1	2	2	2	2	2		#NULL!	#NULL!	#NULL!	#NULL!	#NULL!	#NULL!		2	1	1	2	2	1	2	2	#NULL!	1	2	1	0	2	2		1
1	1	1	2	1	600	0	#NULL!	1	1	1	1	2	1	2	0	0	1	2	2	2	1	2	2	2		#NULL!	#NULL!	#NULL!	#NULL!	#NULL!	#NULL!		1	1	1	2	2	2	1	2	#NULL!	1	2	1	0	2	1		1
1	1	1	2	3	200	0	#NULL!	1	1	1	1	2	1	1	1	0	2	#NULL!	#NULL!	#NULL!	#NULL!	#NULL!	#NULL!	#NULL!		2	1	2	2	2	2		2	1	1	3	2	1	1	2	#NULL!	1	1	1	1	2	1		1
1	1	1	3	3	700	0	#NULL!	1	1	1	0	2	1	1	0	0	1	2	2	2	1	2	2	2		#NULL!	#NULL!	#NULL!	#NULL!	#NULL!	#NULL!		1	1	1	2	2	1	2	2	#NULL!	1	2	1	0	2	1		1
2	1	1	2	3	700	1	2	1	1	1	0	2	1	1	0	0	1	1	2	2	2	2	2	2		#NULL!	#NULL!	#NULL!	#NULL!	#NULL!	#NULL!		1	1	1	2	2	2	1	2	#NULL!	1	2	1	0	2	1		2
1	1	1	2	3	300	0	#NULL!	1	1	1	1	2	1	1	0	0	1	2	2	2	1	2	2	2		#NULL!	#NULL!	#NULL!	#NULL!	#NULL!	#NULL!		1	1	1	1	2	1	2	2	#NULL!	1	2	1	1	2	1	not to lift heavy ob	1
1	1	1	2	3	1000	0	#NULL!	0	#NULL!	1	1	2	1	#NULL!	1	0	1	2	2	2	2	2	2	2	lack of awareness	#NULL!	#NULL!	#NULL!	#NULL!	#NULL!	#NULL!		1	1	1	2	1	2	2	2	#NULL!	1	2	2	1	2	1		1
1	1	1	3	3	1000	0	#NULL!	1	2	1	0	2	1	2	0	1	1	1	2	2	2	2	2	2		#NULL!	#NULL!	#NULL!	#NULL!	#NULL!	#NULL!		1	1	1	2	2	1	1	2	#NULL!	1	2	1	0	2	2		2
1	1	1	2	3	1000	1	2	1	1	1	1	3	1	2	0	1	1	1	2	2	2	2	2	2		#NULL!	#NULL!	#NULL!	#NULL!	#NULL!	#NULL!		1	2	#NULL!	#NULL!	#NULL!	#NULL!	#NULL!	#NULL!	#NULL!	#NULL!	#NULL!	#NULL!	#NULL!	#NULL!	#NULL!		2
1	1	1	2	3	1000	1	2	1	1	1	0	2	1	2	0	0	1	1	2	2	2	2	2	2		#NULL!	#NULL!	#NULL!	#NULL!	#NULL!	#NULL!		1	1	1	2	2	1	1	2	#NULL!	1	2	1	0	2	1		2
1	1	1	6	5	1000	1	1	1	1	1	1	2	1	1	0	0	2	#NULL!	#NULL!	#NULL!	#NULL!	#NULL!	#NULL!	#NULL!		2	2	1	2	2	2		2	1	1	2	2	1	2	2	#NULL!	1	2	1	1	2	1		1
1	1	1	2	3	1500	0	#NULL!	1	1	1	0	3	1	2	0	0	1	2	2	2	1	2	2	2		#NULL!	#NULL!	#NULL!	#NULL!	#NULL!	#NULL!		1	1	1	2	1	2	2	2	#NULL!	1	2	1	0	2	1		1
2	1	1	3	3	1200	0	#NULL!	1	1	1	1	3	1	2	0	1	2	#NULL!	#NULL!	#NULL!	#NULL!	#NULL!	#NULL!	#NULL!		2	1	2	2	2	2		2	1	1	3	2	1	2	2	#NULL!	1	1	2	0	2	1		1
2	1	1	2	3	1000	0	#NULL!	1	2	1	0	3	1	2	1	0	2	#NULL!	#NULL!	#NULL!	#NULL!	#NULL!	#NULL!	#NULL!		1	2	2	2	2	2		2	1	1	2	1	2	2	2	#NULL!	1	2	1	1	2	1		1
1	1	1	2	1	0	0	#NULL!	1	2	1	0	2	1	2	0	0	1	2	2	2	1	2	2	2		#NULL!	#NULL!	#NULL!	#NULL!	#NULL!	#NULL!		1	1	1	3	2	1	2	2	#NULL!	1	2	1	1	2	1		1
1	1	1	2	3	0	0	#NULL!	0	#NULL!	1	1	3	1	2	1	0	1	2	2	2	1	2	2	2		#NULL!	#NULL!	#NULL!	#NULL!	#NULL!	#NULL!		1	1	1	2	2	2	1	2	#NULL!	1	2	1	0	2	1		1
1	1	1	2	3	1000	0	#NULL!	1	2	1	0	2	1	1	0	0	1	2	2	2	2	2	2	1		#NULL!	#NULL!	#NULL!	#NULL!	#NULL!	#NULL!		1	2	#NULL!	#NULL!	#NULL!	#NULL!	#NULL!	#NULL!	#NULL!	#NULL!	#NULL!	#NULL!	#NULL!	#NULL!	#NULL!		2
2	1	1	2	4	1000	1	2	1	1	1	0	2	1	1	0	0	1	1	2	2	2	2	2	2		#NULL!	#NULL!	#NULL!	#NULL!	#NULL!	#NULL!		1	1	1	2	2	2	1	2	#NULL!	1	2	1	0	2	1		2
2	1	1	3	3	0	0	#NULL!	1	1	1	1	2	1	1	1	0	1	2	2	2	1	2	2	2		#NULL!	#NULL!	#NULL!	#NULL!	#NULL!	#NULL!		1	1	1	2	2	1	2	2	#NULL!	1	2	2	0	2	2	not to lift heavy ob	1
1	1	1	2	4	2500	0	#NULL!	1	2	1	1	3	1	2	0	0	1	2	1	2	2	2	2	2		#NULL!	#NULL!	#NULL!	#NULL!	#NULL!	#NULL!		2	1	1	2	2	1	2	2	#NULL!	1	2	2	1	2	2	don't consult TBAs	1
1	1	1	2	3	2500	0	#NULL!	0	#NULL!	1	0	2	1	1	0	0	1	#NULL!	2	#NULL!	#NULL!	#NULL!	#NULL!	#NULL!		#NULL!	#NULL!	#NULL!	#NULL!	#NULL!	#NULL!		1	1	1	2	#NULL!	#NULL!	1	#NULL!	#NULL!	1	#NULL!	#NULL!	#NULL!	#NULL!	1	health inst.delivery	2
1	1	1	2	3	600	1	2	1	2	1	0	2	1	1	0	0	1	1	2	2	2	2	1	2		#NULL!	#NULL!	#NULL!	#NULL!	#NULL!	#NULL!		1	1	1	2	2	2	1	2	#NULL!	1	2	1	0	2	1		2
1	1	1	2	3	1500	1	2	1	2	1	0	2	1	1	0	0	2	#NULL!	#NULL!	#NULL!	#NULL!	#NULL!	#NULL!	#NULL!		2	1	2	2	2	2		2	1	1	2	2	1	1	2	#NULL!	1	2	1	0	2	1		2
2	1	1	3	4	1000	1	2	1	1	1	0	2	1	1	0	0	2	#NULL!	#NULL!	#NULL!	#NULL!	#NULL!	#NULL!	#NULL!		1	2	2	2	2	2		2	1	1	1	1	2	2	2	#NULL!	1	2	1	0	2	1		1
2	1	1	2	4	1000	1	2	1	2	1	0	2	1	1	0	0	1	2	2	2	2	2	1	2		#NULL!	#NULL!	#NULL!	#NULL!	#NULL!	#NULL!		1	2	#NULL!	#NULL!	#NULL!	#NULL!	#NULL!	#NULL!	#NULL!	#NULL!	#NULL!	#NULL!	#NULL!	#NULL!	#NULL!		2
1	1	1	6	5	0	0	#NULL!	1	2	1	1	1	1	#NULL!	#NULL!	#NULL!	1	#NULL!	#NULL!	#NULL!	#NULL!	#NULL!	#NULL!	#NULL!		#NULL!	#NULL!	#NULL!	#NULL!	#NULL!	#NULL!		#NULL!	1	1	1	1	2	2	2	#NULL!	1	2	2	1	2	2		1
1	3	2	6	1	0	0	#NULL!	0	#NULL!	1	0	2	1	2	0	0	1	2	2	2	1	2	2	2		#NULL!	#NULL!	#NULL!	#NULL!	#NULL!	#NULL!		1	1	1	2	1	2	2	2	#NULL!	1	2	1	1	2	2		1
1	1	1	2	5	1000	1	2	1	2	1	1	2	1	1	0	0	1	2	1	2	2	2	2	2		#NULL!	#NULL!	#NULL!	#NULL!	#NULL!	#NULL!		1	1	1	1	2	1	2	2	#NULL!	1	2	1	0	2	1	health facility del.	1
1	1	1	2	3	2000	0	#NULL!	1	1	1	1	3	1	2	0	1	2	#NULL!	#NULL!	#NULL!	#NULL!	#NULL!	#NULL!	#NULL!		1	2	2	2	2	2		3	1	1	1	1	2	2	2	#NULL!	1	2	1	0	2	1		1
1	1	1	3	3	1000	0	#NULL!	1	1	1	0	3	1	2	0	1	1	1	2	2	2	2	2	2		#NULL!	#NULL!	#NULL!	#NULL!	#NULL!	#NULL!		1	1	1	2	2	1	1	2	#NULL!	1	2	1	0	2	1		1
1	1	2	3	3	1000	1	2	1	1	1	0	2	1	2	0	0	1	1	2	2	2	2	2	2		#NULL!	#NULL!	#NULL!	#NULL!	#NULL!	#NULL!		1	1	1	2	2	1	1	2	#NULL!	1	2	1	0	2	1		1
1	1	1	2	4	0	1	2	1	1	1	0	2	1	1	0	0	2	#NULL!	#NULL!	#NULL!	#NULL!	#NULL!	#NULL!	#NULL!		1	2	2	2	2	2		2	1	1	2	2	1	2	2	#NULL!	1	2	1	1	1	2		1
1	1	1	2	3	1000	0	#NULL!	1	1	1	0	3	1	2	0	0	2	#NULL!	#NULL!	#NULL!	#NULL!	#NULL!	#NULL!	#NULL!		2	2	1	2	2	2		3	1	1	2	2	1	2	2	#NULL!	1	2	1	0	2	1		1
1	1	1	2	4	800	0	#NULL!	1	2	1	1	2	1	1	0	0	2	#NULL!	#NULL!	#NULL!	#NULL!	#NULL!	#NULL!	#NULL!		2	1	2	2	2	2		2	1	1	2	2	1	2	2	#NULL!	2	#NULL!	#NULL!	#NULL!	#NULL!	#NULL!		1
1	1	1	6	3	1000	0	#NULL!	1	1	1	0	3	1	2	0	0	1	1	2	2	2	2	2	2		#NULL!	#NULL!	#NULL!	#NULL!	#NULL!	#NULL!		1	1	1	2	2	1	2	2	#NULL!	1	2	1	1	2	1	never lift heavy obj	1
1	1	1	2	1	950	0	#NULL!	0	#NULL!	1	1	2	1	2	0	0	1	1	2	2	2	2	2	2		#NULL!	#NULL!	#NULL!	#NULL!	#NULL!	#NULL!		1	1	1	1	2	1	2	2	#NULL!	2	#NULL!	#NULL!	#NULL!	#NULL!	#NULL!		2
2	1	1	6	4	0	1	2	1	1	1	0	2	1	1	0	0	2	#NULL!	#NULL!	#NULL!	#NULL!	#NULL!	#NULL!	#NULL!		1	2	2	2	2	2		2	1	0	#NULL!	#NULL!	#NULL!	#NULL!	#NULL!	#NULL!	#NULL!	#NULL!	#NULL!	#NULL!	#NULL!	#NULL!		1
3	1	1	2	3	0	0	#NULL!	1	2	1	0	1	1	#NULL!	#NULL!	#NULL!	1	#NULL!	#NULL!	#NULL!	#NULL!	#NULL!	#NULL!	#NULL!		#NULL!	#NULL!	#NULL!	#NULL!	#NULL!	#NULL!		#NULL!	1	1	3	2	1	2	2	#NULL!	1	2	2	1	2	1		2
2	1	1	2	3	1000	0	#NULL!	1	1	1	0	3	1	2	0	0	2	#NULL!	#NULL!	#NULL!	#NULL!	#NULL!	#NULL!	#NULL!		1	2	2	2	2	2		2	1	1	2	2	1	2	2	#NULL!	1	1	1	0	2	1		1
1	1	1	3	3	1000	0	#NULL!	0	#NULL!	1	0	2	1	2	0	0	1	1	2	2	2	2	2	2		#NULL!	#NULL!	#NULL!	#NULL!	#NULL!	#NULL!		1	1	1	2	2	1	1	2	#NULL!	1	2	1	0	2	1		2
2	1	1	2	3	2000	0	#NULL!	1	1	1	0	3	1	2	0	0	2	#NULL!	#NULL!	#NULL!	#NULL!	#NULL!	#NULL!	#NULL!		1	2	1	2	2	2		1	1	1	2	2	1	2	2	#NULL!	1	1	1	0	2	1		1
1	1	1	6	3	500	0	#NULL!	1	1	1	0	2	1	1	1	1	1	2	2	2	1	2	2	2		#NULL!	#NULL!	#NULL!	#NULL!	#NULL!	#NULL!		1	1	1	2	2	2	1	2	#NULL!	1	2	2	1	2	1		1
1	1	1	2	3	2000	0	#NULL!	0	#NULL!	1	0	2	1	2	0	0	1	1	2	2	2	2	2	2		#NULL!	#NULL!	#NULL!	#NULL!	#NULL!	#NULL!		1	1	1	2	2	1	1	2	#NULL!	1	2	1	0	2	2		2
1	1	1	2	3	2000	0	#NULL!	0	#NULL!	1	1	2	1	#NULL!	1	0	1	2	2	2	2	2	2	2		#NULL!	#NULL!	#NULL!	#NULL!	#NULL!	#NULL!		#NULL!	1	1	1	2	1	2	2	#NULL!	1	2	1	0	2	1	never lift heavy obj	1
2	1	1	6	4	1000	1	2	1	1	1	0	2	1	2	0	0	2	#NULL!	#NULL!	#NULL!	#NULL!	#NULL!	#NULL!	#NULL!		2	2	1	2	2	2		2	1	1	2	2	1	2	2	#NULL!	1	2	1	1	2	1		1
1	1	1	2	4	1000	1	2	1	1	1	0	3	1	2	1	0	2	#NULL!	#NULL!	#NULL!	#NULL!	#NULL!	#NULL!	#NULL!		2	1	2	2	2	2		2	1	1	2	2	1	2	2	#NULL!	1	2	2	0	2	1		1
1	1	1	3	3	1000	1	2	0	#NULL!	1	0	2	1	2	0	0	1	1	2	2	2	2	2	2		#NULL!	#NULL!	#NULL!	#NULL!	#NULL!	#NULL!		1	1	1	2	2	1	1	2	#NULL!	1	2	1	1	2	1		2
2	1	1	2	1	2000	0	#NULL!	1	1	1	0	3	1	2	0	0	2	#NULL!	#NULL!	#NULL!	#NULL!	#NULL!	#NULL!	#NULL!		2	1	2	2	2	2		2	2	#NULL!	#NULL!	#NULL!	#NULL!	#NULL!	#NULL!	#NULL!	#NULL!	#NULL!	#NULL!	#NULL!	#NULL!	#NULL!		1
1	4	2	2	4	0	1	2	1	1	1	0	2	1	1	0	0	2	#NULL!	#NULL!	#NULL!	#NULL!	#NULL!	#NULL!	#NULL!		1	2	2	2	2	2		2	1	1	3	2	2	1	2	#NULL!	1	2	1	1	2	1		1
1	1	1	2	4	2000	0	#NULL!	1	2	1	0	2	1	2	0	0	1	1	2	2	2	2	2	2		#NULL!	#NULL!	#NULL!	#NULL!	#NULL!	#NULL!		1	1	1	1	1	1	1	2	#NULL!	1	1	1	1	2	1		1
1	1	1	2	1	500	0	#NULL!	0	#NULL!	1	1	2	1	1	0	0	1	1	2	2	2	2	2	2		#NULL!	#NULL!	#NULL!	#NULL!	#NULL!	#NULL!		1	1	1	1	1	1	2	2	#NULL!	2	#NULL!	#NULL!	#NULL!	#NULL!	#NULL!		2
1	1	1	4	4	1200	1	2	1	2	1	0	1	1	#NULL!	#NULL!	#NULL!	#NULL!	#NULL!	#NULL!	#NULL!	#NULL!	#NULL!	#NULL!	#NULL!		#NULL!	#NULL!	#NULL!	#NULL!	#NULL!	#NULL!		#NULL!	1	1	1	1	2	1	2	#NULL!	2	#NULL!	#NULL!	#NULL!	#NULL!	#NULL!		2
1	1	1	2	4	1500	1	3	1	1	1	0	2	1	2	0	0	2	#NULL!	#NULL!	#NULL!	#NULL!	#NULL!	#NULL!	#NULL!		2	1	2	2	2	2		2	1	1	3	1	1	1	1	#NULL!	1	1	1	1	2	1		1
1	1	1	3	3	400	1	2	1	2	1	0	2	1	1	0	0	1	1	2	2	2	2	2	2		#NULL!	#NULL!	#NULL!	#NULL!	#NULL!	#NULL!		1	1	1	1	1	1	1	2	#NULL!	1	1	1	1	2	1		1
1	1	1	2	3	2950	0	#NULL!	0	#NULL!	1	0	1	1	#NULL!	#NULL!	#NULL!	#NULL!	#NULL!	#NULL!	#NULL!	#NULL!	#NULL!	#NULL!	#NULL!		#NULL!	#NULL!	#NULL!	#NULL!	#NULL!	#NULL!		#NULL!	1	0	#NULL!	#NULL!	#NULL!	#NULL!	#NULL!	#NULL!	#NULL!	#NULL!	#NULL!	#NULL!	#NULL!	#NULL!		2
1	1	1	2	3	350	0	#NULL!	0	#NULL!	1	0	3	1	3	0	0	1	2	1	2	2	2	2	2		#NULL!	#NULL!	#NULL!	#NULL!	#NULL!	#NULL!		1	1	1	2	1	1	1	2	#NULL!	1	1	1	1	2	1		1
1	1	2	4	4	400	1	1	1	1	1	0	1	1	#NULL!	#NULL!	#NULL!	#NULL!	#NULL!	#NULL!	#NULL!	#NULL!	#NULL!	#NULL!	#NULL!		#NULL!	#NULL!	#NULL!	#NULL!	#NULL!	#NULL!		#NULL!	1	0	#NULL!	#NULL!	#NULL!	#NULL!	#NULL!	#NULL!	#NULL!	#NULL!	#NULL!	#NULL!	#NULL!	#NULL!		1
1	1	1	2	3	1000	1	1	1	2	1	0	3	1	2	1	0	2	#NULL!	#NULL!	#NULL!	#NULL!	#NULL!	#NULL!	#NULL!		2	2	1	2	2	2		3	1	1	2	1	1	1	1	#NULL!	1	1	1	0	2	2		1
1	1	1	2	3	233	1	2	0	#NULL!	1	0	2	1	2	0	0	1	1	2	2	2	2	2	2		#NULL!	#NULL!	#NULL!	#NULL!	#NULL!	#NULL!		1	1	1	1	1	2	1	1	#NULL!	1	1	1	0	2	1		1
1	1	1	3	1	350	0	#NULL!	0	#NULL!	1	0	3	1	2	0	0	1	1	2	2	2	2	2	2		#NULL!	#NULL!	#NULL!	#NULL!	#NULL!	#NULL!		1	1	1	3	1	1	1	1	#NULL!	1	1	1	1	2	2		1
1	1	1	2	3	400	0	#NULL!	0	#NULL!	1	0	3	1	3	0	0	1	2	1	2	2	2	2	2		#NULL!	#NULL!	#NULL!	#NULL!	#NULL!	#NULL!		1	1	1	2	1	2	1	2	#NULL!	1	2	1	0	2	1		1
1	4	2	1	1	1000	0	#NULL!	1	2	1	1	3	1	2	0	0	1	2	1	2	2	2	2	2		#NULL!	#NULL!	#NULL!	#NULL!	#NULL!	#NULL!		2	1	1	1	1	2	2	2	#NULL!	2	#NULL!	#NULL!	#NULL!	#NULL!	#NULL!		2
1	1	1	3	5	2770	1	1	1	1	1	1	2	1	2	0	0	2	#NULL!	#NULL!	#NULL!	#NULL!	#NULL!	#NULL!	#NULL!		1	2	2	2	2	2		3	1	1	3	1	1	1	1	#NULL!	1	1	1	1	2	1		1
2	1	1	2	3	800	1	2	1	2	1	1	2	1	2	0	0	1	2	1	2	2	2	2	2		#NULL!	#NULL!	#NULL!	#NULL!	#NULL!	#NULL!		1	2	#NULL!	#NULL!	#NULL!	#NULL!	#NULL!	#NULL!	#NULL!	#NULL!	#NULL!	#NULL!	#NULL!	#NULL!	#NULL!		1
1	1	1	2	3	600	0	#NULL!	0	#NULL!	1	0	2	1	1	0	0	1	2	2	1	2	2	2	2		#NULL!	#NULL!	#NULL!	#NULL!	#NULL!	#NULL!		1	1	1	2	2	2	1	1	#NULL!	1	1	1	1	2	2		1
1	2	2	6	3	300	0	#NULL!	0	#NULL!	1	0	1	1	#NULL!	#NULL!	#NULL!	#NULL!	#NULL!	#NULL!	#NULL!	#NULL!	#NULL!	#NULL!	#NULL!		#NULL!	#NULL!	#NULL!	#NULL!	#NULL!	#NULL!		#NULL!	1	1	2	1	1	1	1	#NULL!	1	2	1	0	2	1		1
1	1	1	2	3	525	0	#NULL!	1	1	1	0	3	1	2	0	0	1	1	1	2	2	2	2	2		#NULL!	#NULL!	#NULL!	#NULL!	#NULL!	#NULL!		2	1	1	1	1	1	2	2	#NULL!	1	2	1	1	2	1		1
2	1	1	2	1	800	0	#NULL!	0	#NULL!	1	1	3	1	2	0	0	1	1	1	2	2	2	2	2		#NULL!	#NULL!	#NULL!	#NULL!	#NULL!	#NULL!		2	1	1	1	1	2	1	2	#NULL!	1	2	1	0	2	1		2
1	1	1	2	3	950	1	2	0	#NULL!	1	0	3	1	2	0	0	1	1	1	2	2	2	2	2		#NULL!	#NULL!	#NULL!	#NULL!	#NULL!	#NULL!		2	1	1	1	1	2	2	2	#NULL!	2	#NULL!	#NULL!	#NULL!	#NULL!	#NULL!		2
1	1	1	2	3	240	0	#NULL!	1	2	1	1	3	1	2	0	0	2	#NULL!	#NULL!	#NULL!	#NULL!	#NULL!	#NULL!	#NULL!		2	1	2	2	2	2		2	1	1	1	1	2	2	2	#NULL!	1	1	1	0	2	1		1
2	1	1	2	4	1116	1	2	1	2	1	0	2	1	2	0	0	2	#NULL!	#NULL!	#NULL!	#NULL!	#NULL!	#NULL!	#NULL!		2	1	2	2	2	2		2	1	1	1	1	1	1	1	#NULL!	1	2	1	0	2	1		1
2	1	1	2	1	400	0	#NULL!	0	#NULL!	1	1	3	1	2	0	0	1	1	2	2	2	2	2	2		#NULL!	#NULL!	#NULL!	#NULL!	#NULL!	#NULL!		1	1	1	1	1	2	2	2	#NULL!	1	2	1	0	2	1		1
2	1	1	4	4	400	1	1	1	2	1	1	1	1	#NULL!	#NULL!	#NULL!	#NULL!	#NULL!	#NULL!	#NULL!	#NULL!	#NULL!	#NULL!	#NULL!		#NULL!	#NULL!	#NULL!	#NULL!	#NULL!	#NULL!		#NULL!	1	1	1	1	2	2	2	#NULL!	1	2	1	0	2	1		2
1	1	1	2	3	600	1	2	1	2	1	1	1	1	#NULL!	#NULL!	#NULL!	#NULL!	#NULL!	#NULL!	#NULL!	#NULL!	#NULL!	#NULL!	#NULL!		#NULL!	#NULL!	#NULL!	#NULL!	#NULL!	#NULL!		#NULL!	1	1	1	1	2	2	2	#NULL!	2	#NULL!	#NULL!	#NULL!	#NULL!	#NULL!		2
1	1	1	2	3	400	0	#NULL!	0	#NULL!	1	0	3	1	3	0	0	1	2	1	2	2	2	2	2		#NULL!	#NULL!	#NULL!	#NULL!	#NULL!	#NULL!		1	1	1	2	1	1	1	1	#NULL!	1	1	1	1	2	1		1
2	1	1	2	3	500	0	#NULL!	1	1	1	0	2	1	1	0	0	1	1	#NULL!	#NULL!	#NULL!	#NULL!	#NULL!	#NULL!		#NULL!	#NULL!	#NULL!	#NULL!	#NULL!	#NULL!		2	1	1	1	1	#NULL!	#NULL!	#NULL!	#NULL!	1	#NULL!	1	#NULL!	#NULL!	1		1
1	1	1	1	4	700	1	2	0	#NULL!	1	0	2	1	2	0	0	1	1	2	2	2	2	2	2		#NULL!	#NULL!	#NULL!	#NULL!	#NULL!	#NULL!		1	1	1	2	1	1	1	2	#NULL!	1	2	2	1	2	1		1
1	1	1	2	3	200	0	#NULL!	1	2	1	0	2	1	2	0	0	1	2	1	2	2	2	2	2		#NULL!	#NULL!	#NULL!	#NULL!	#NULL!	#NULL!		1	1	1	1	1	2	2	2	#NULL!	1	2	1	0	2	1		1
1	1	1	3	3	500	0	#NULL!	0	#NULL!	1	1	1	1	#NULL!	#NULL!	#NULL!	#NULL!	#NULL!	#NULL!	#NULL!	#NULL!	#NULL!	#NULL!	#NULL!		#NULL!	#NULL!	#NULL!	#NULL!	#NULL!	#NULL!		#NULL!	1	1	2	1	1	2	2	#NULL!	2	#NULL!	#NULL!	#NULL!	#NULL!	#NULL!		2
1	1	1	1	3	800	1	2	1	2	1	1	2	1	2	0	0	2	#NULL!	#NULL!	#NULL!	#NULL!	#NULL!	#NULL!	#NULL!		2	1	2	2	1	2		3	1	1	2	1	1	1	2	#NULL!	1	1	1	0	1	1		1
1	1	1	2	3	600	1	1	1	1	1	0	3	1	2	0	0	1	2	1	2	2	2	2	2		#NULL!	#NULL!	#NULL!	#NULL!	#NULL!	#NULL!		2	1	1	2	1	2	1	1	#NULL!	1	2	1	0	2	1		1
1	1	1	2	4	500	0	#NULL!	1	2	1	0	2	1	1	0	0	2	#NULL!	#NULL!	#NULL!	#NULL!	#NULL!	#NULL!	#NULL!		1	2	2	2	2	2		2	1	1	1	1	1	1	2	#NULL!	1	2	1	0	2	1		2
1	1	1	2	1	600	0	#NULL!	0	#NULL!	1	1	2	1	1	0	0	1	1	2	2	2	2	2	2		#NULL!	#NULL!	#NULL!	#NULL!	#NULL!	#NULL!		1	1	1	1	1	2	2	1	#NULL!	1	2	1	0	2	1		1
1	1	1	2	3	1000	0	#NULL!	1	2	1	0	3	1	2	0	0	1	1	2	2	2	2	2	2		#NULL!	#NULL!	#NULL!	#NULL!	#NULL!	#NULL!		1	1	1	1	1	2	1	2	#NULL!	1	2	1	1	2	2		1
1	1	1	1	3	600	0	#NULL!	0	#NULL!	1	0	3	1	2	0	0	1	1	2	2	2	2	2	2		#NULL!	#NULL!	#NULL!	#NULL!	#NULL!	#NULL!		1	1	1	1	1	2	1	2	#NULL!	1	1	2	0	2	2	TT Vaccination	1
1	1	1	2	3	300	0	#NULL!	1	2	1	0	1	1	#NULL!	#NULL!	#NULL!	#NULL!	#NULL!	#NULL!	#NULL!	#NULL!	#NULL!	#NULL!	#NULL!		#NULL!	#NULL!	#NULL!	#NULL!	#NULL!	#NULL!		#NULL!	1	1	2	1	1	1	1	#NULL!	1	1	1	0	2	1		2
1	1	1	2	3	350	0	#NULL!	0	#NULL!	1	0	2	1	2	0	0	1	1	2	2	2	2	2	2		#NULL!	#NULL!	#NULL!	#NULL!	#NULL!	#NULL!		2	1	1	2	1	2	2	2	#NULL!	1	2	1	0	2	1		1
1	1	1	2	3	500	0	#NULL!	0	#NULL!	1	0	2	1	1	0	0	1	1	2	2	2	2	2	2		#NULL!	#NULL!	#NULL!	#NULL!	#NULL!	#NULL!		1	1	1	2	1	1	2	2	#NULL!	1	1	2	0	2	1		1
1	1	1	2	1	400	0	#NULL!	0	#NULL!	1	0	3	1	2	0	0	1	1	2	2	2	2	2	2		#NULL!	#NULL!	#NULL!	#NULL!	#NULL!	#NULL!		2	1	1	1	1	1	2	2	#NULL!	1	2	1	1	2	2		1
1	1	1	2	3	700	1	2	1	2	1	1	2	1	2	0	0	2	#NULL!	#NULL!	#NULL!	#NULL!	#NULL!	#NULL!	#NULL!		1	2	2	2	2	2		2	1	1	2	1	2	1	2	#NULL!	1	1	1	0	2	1		1
1	1	1	2	1	800	0	#NULL!	0	#NULL!	1	1	1	1	#NULL!	#NULL!	#NULL!	#NULL!	#NULL!	#NULL!	#NULL!	#NULL!	#NULL!	#NULL!	#NULL!		#NULL!	#NULL!	#NULL!	#NULL!	#NULL!	#NULL!		#NULL!	1	0	#NULL!	#NULL!	#NULL!	#NULL!	#NULL!	#NULL!	#NULL!	#NULL!	#NULL!	#NULL!	#NULL!	#NULL!		2
1	1	2	2	4	700	1	1	1	1	1	1	2	1	2	0	0	2	#NULL!	#NULL!	#NULL!	#NULL!	#NULL!	#NULL!	#NULL!		2	1	2	2	2	2		2	1	1	2	1	2	1	2	#NULL!	1	1	1	1	2	1		1
1	1	1	3	3	600	1	2	1	2	1	0	2	1	1	0	0	1	1	2	2	2	2	2	2		#NULL!	#NULL!	#NULL!	#NULL!	#NULL!	#NULL!		1	1	1	1	1	2	1	1	#NULL!	1	2	1	0	2	1		1
1	1	1	2	3	2100	1	2	1	1	1	0	2	1	1	0	0	1	1	2	2	2	2	2	2		#NULL!	#NULL!	#NULL!	#NULL!	#NULL!	#NULL!		1	1	1	2	1	1	1	1	#NULL!	1	1	1	1	1	1		1
2	1	1	1	4	2000	1	2	1	2	1	1	1	1	#NULL!	#NULL!	#NULL!	#NULL!	#NULL!	#NULL!	#NULL!	#NULL!	#NULL!	#NULL!	#NULL!		#NULL!	#NULL!	#NULL!	#NULL!	#NULL!	#NULL!		#NULL!	1	1	3	1	1	1	1	#NULL!	1	1	1	1	1	2		1
1	1	1	2	4	0	1	2	1	2	1	1	1	1	#NULL!	#NULL!	#NULL!	#NULL!	#NULL!	#NULL!	#NULL!	#NULL!	#NULL!	#NULL!	#NULL!		#NULL!	#NULL!	#NULL!	#NULL!	#NULL!	#NULL!		#NULL!	1	1	1	1	1	1	2	#NULL!	1	2	1	0	2	1		1
2	1	1	2	3	300	1	2	1	2	1	0	3	1	3	0	0	2	#NULL!	#NULL!	#NULL!	#NULL!	#NULL!	#NULL!	#NULL!		1	2	2	2	2	2		3	1	1	2	1	1	1	2	#NULL!	1	2	2	1	2	1		2
1	1	1	5	4	1250	1	1	1	1	1	0	2	1	2	0	0	1	1	2	2	2	2	2	2		#NULL!	#NULL!	#NULL!	#NULL!	#NULL!	#NULL!		1	1	1	2	1	1	1	1	#NULL!	1	1	1	1	1	1		1
1	1	1	2	3	950	1	2	1	2	1	1	2	1	1	0	0	2	#NULL!	#NULL!	#NULL!	#NULL!	#NULL!	#NULL!	#NULL!		1	2	2	2	2	2		2	1	1	2	1	1	1	1	#NULL!	2	#NULL!	#NULL!	#NULL!	#NULL!	#NULL!		1
2	1	1	6	4	800	1	1	1	1	1	1	1	1	#NULL!	#NULL!	#NULL!	#NULL!	#NULL!	#NULL!	#NULL!	#NULL!	#NULL!	#NULL!	#NULL!		#NULL!	#NULL!	#NULL!	#NULL!	#NULL!	#NULL!		#NULL!	1	1	2	1	1	1	2	#NULL!	1	1	2	0	2	1		2
1	1	1	2	1	900	0	#NULL!	0	#NULL!	1	0	3	1	2	1	0	1	2	1	2	2	2	2	2		#NULL!	#NULL!	#NULL!	#NULL!	#NULL!	#NULL!		2	1	1	2	1	1	1	2	#NULL!	1	1	2	1	1	1		1
1	1	1	2	3	1000	1	1	1	1	1	1	2	1	1	0	0	1	1	2	2	2	2	2	2		#NULL!	#NULL!	#NULL!	#NULL!	#NULL!	#NULL!		1	1	1	2	1	1	1	2	#NULL!	1	1	2	1	2	1		1
2	1	1	5	1	800	0	#NULL!	0	#NULL!	1	1	1	1	#NULL!	#NULL!	#NULL!	#NULL!	#NULL!	#NULL!	#NULL!	#NULL!	#NULL!	#NULL!	#NULL!		#NULL!	#NULL!	#NULL!	#NULL!	#NULL!	#NULL!		#NULL!	1	0	#NULL!	#NULL!	#NULL!	#NULL!	#NULL!	#NULL!	#NULL!	#NULL!	#NULL!	#NULL!	#NULL!	#NULL!		1
1	1	1	2	3	800	1	2	1	1	1	1	2	1	1	0	0	2	#NULL!	#NULL!	#NULL!	#NULL!	#NULL!	#NULL!	#NULL!		2	1	2	2	2	2		2	1	1	1	1	2	2	1	#NULL!	1	2	1	0	2	1		1
2	1	1	2	1	750	0	#NULL!	0	#NULL!	1	1	1	1	#NULL!	#NULL!	#NULL!	#NULL!	#NULL!	#NULL!	#NULL!	#NULL!	#NULL!	#NULL!	#NULL!		#NULL!	#NULL!	#NULL!	#NULL!	#NULL!	#NULL!		#NULL!	1	1	1	2	2	1	2	#NULL!	1	2	1	0	2	1		1
1	1	1	1	3	650	1	2	1	2	1	1	1	1	#NULL!	#NULL!	#NULL!	#NULL!	#NULL!	#NULL!	#NULL!	#NULL!	#NULL!	#NULL!	#NULL!		#NULL!	#NULL!	#NULL!	#NULL!	#NULL!	#NULL!		#NULL!	1	1	1	1	2	1	2	#NULL!	2	#NULL!	#NULL!	#NULL!	#NULL!	#NULL!		2
1	1	1	1	3	1000	1	2	1	2	1	1	2	1	1	0	0	1	2	1	2	2	2	2	2		#NULL!	#NULL!	#NULL!	#NULL!	#NULL!	#NULL!		1	1	1	1	1	2	1	2	#NULL!	2	#NULL!	#NULL!	#NULL!	#NULL!	#NULL!		2
1	1	1	4	4	900	1	1	1	1	1	1	1	1	#NULL!	#NULL!	#NULL!	#NULL!	#NULL!	#NULL!	#NULL!	#NULL!	#NULL!	#NULL!	#NULL!		#NULL!	#NULL!	#NULL!	#NULL!	#NULL!	#NULL!		#NULL!	1	1	1	1	1	2	2	#NULL!	1	1	2	1	2	1		1
2	1	1	1	3	800	1	1	1	1	1	0	2	1	2	0	0	2	#NULL!	#NULL!	#NULL!	#NULL!	#NULL!	#NULL!	#NULL!		1	2	2	2	2	2		2	1	1	2	1	2	1	1	#NULL!	1	2	1	1	2	1		1
2	1	1	1	4	500	1	1	1	2	1	1	1	1	#NULL!	#NULL!	#NULL!	#NULL!	#NULL!	#NULL!	#NULL!	#NULL!	#NULL!	#NULL!	#NULL!		#NULL!	#NULL!	#NULL!	#NULL!	#NULL!	#NULL!		#NULL!	2	#NULL!	#NULL!	#NULL!	#NULL!	#NULL!	#NULL!	#NULL!	#NULL!	#NULL!	#NULL!	#NULL!	#NULL!	#NULL!		2
1	1	1	1	3	400	1	1	1	2	1	0	2	1	2	0	0	1	1	2	2	2	2	2	2		#NULL!	#NULL!	#NULL!	#NULL!	#NULL!	#NULL!		1	2	#NULL!	#NULL!	#NULL!	#NULL!	#NULL!	#NULL!	#NULL!	#NULL!	#NULL!	#NULL!	#NULL!	#NULL!	#NULL!		1
1	1	1	1	3	300	0	#NULL!	0	#NULL!	1	0	3	1	3	0	0	1	2	1	2	2	2	2	2		#NULL!	#NULL!	#NULL!	#NULL!	#NULL!	#NULL!		1	1	1	2	2	2	1	2	#NULL!	1	2	2	1	2	2		2
2	1	1	1	1	900	0	#NULL!	0	#NULL!	1	1	3	1	2	0	0	2	#NULL!	#NULL!	#NULL!	#NULL!	#NULL!	#NULL!	#NULL!		1	2	2	2	2	2		2	1	1	2	1	2	1	2	#NULL!	1	1	2	0	2	1		1
1	1	1	1	3	504	1	2	1	2	1	1	2	1	1	0	0	1	1	2	2	2	2	2	2		#NULL!	#NULL!	#NULL!	#NULL!	#NULL!	#NULL!		1	1	1	2	1	2	1	1	#NULL!	1	1	1	1	2	1		1
1	1	1	1	3	750	0	#NULL!	0	#NULL!	1	1	2	1	1	0	0	1	2	1	2	1	2	2	2		#NULL!	#NULL!	#NULL!	#NULL!	#NULL!	#NULL!		1	1	1	2	1	1	1	1	#NULL!	1	2	1	0	2	1		1
1	1	1	1	3	408	1	3	0	#NULL!	1	0	3	1	2	0	0	1	2	2	2	2	2	2	2	lack of awareness	#NULL!	#NULL!	#NULL!	#NULL!	#NULL!	#NULL!		1	1	1	2	1	2	1	1	#NULL!	1	1	1	1	2	1		1
1	1	1	1	4	400	1	2	1	3	1	0	2	1	2	0	0	1	1	2	2	2	2	2	2		#NULL!	#NULL!	#NULL!	#NULL!	#NULL!	#NULL!		1	1	1	3	1	1	1	1	#NULL!	1	1	1	1	2	1		1
1	1	1	1	1	480	0	#NULL!	0	#NULL!	1	0	3	1	2	0	0	1	2	2	2	2	2	1	2		#NULL!	#NULL!	#NULL!	#NULL!	#NULL!	#NULL!		1	1	1	2	1	2	1	2	#NULL!	1	1	1	1	2	1		1
2	1	1	1	3	1300	1	3	1	3	1	0	3	1	2	0	0	1	2	2	2	2	2	2	2	lack of awareness	#NULL!	#NULL!	#NULL!	#NULL!	#NULL!	#NULL!		1	1	1	2	1	1	1	1	#NULL!	1	1	2	1	2	2		1
1	1	1	1	3	900	1	2	1	2	1	1	2	1	1	0	0	2	#NULL!	#NULL!	#NULL!	#NULL!	#NULL!	#NULL!	#NULL!		2	1	2	2	2	2		3	1	1	2	1	1	1	2	#NULL!	1	1	2	1	2	1		1
2	1	1	1	3	600	1	2	1	1	1	1	2	1	2	0	0	2	#NULL!	#NULL!	#NULL!	#NULL!	#NULL!	#NULL!	#NULL!		2	1	2	2	2	2		2	1	1	2	1	1	1	2	#NULL!	1	1	1	1	2	2		1
1	1	1	1	1	700	0	#NULL!	0	#NULL!	1	1	1	1	#NULL!	#NULL!	#NULL!	#NULL!	#NULL!	#NULL!	#NULL!	#NULL!	#NULL!	#NULL!	#NULL!		#NULL!	#NULL!	#NULL!	#NULL!	#NULL!	#NULL!		#NULL!	2	#NULL!	#NULL!	#NULL!	#NULL!	#NULL!	#NULL!	#NULL!	#NULL!	#NULL!	#NULL!	#NULL!	#NULL!	#NULL!		2
1	1	1	1	3	450	1	3	1	1	1	1	2	1	2	0	0	2	#NULL!	#NULL!	#NULL!	#NULL!	#NULL!	#NULL!	#NULL!		1	2	2	2	2	2		2	1	1	3	1	2	1	1	#NULL!	1	2	2	1	2	1		2
1	1	1	1	3	1266	1	1	1	1	1	0	1	1	#NULL!	#NULL!	#NULL!	#NULL!	#NULL!	#NULL!	#NULL!	#NULL!	#NULL!	#NULL!	#NULL!		#NULL!	#NULL!	#NULL!	#NULL!	#NULL!	#NULL!		#NULL!	1	1	1	1	2	2	2	#NULL!	1	2	1	1	2	1		2
1	1	1	3	3	300	0	#NULL!	1	2	1	0	3	1	2	0	0	1	2	2	2	2	2	2	2	lack of awareness	#NULL!	#NULL!	#NULL!	#NULL!	#NULL!	#NULL!		1	1	1	2	2	2	1	2	#NULL!	1	1	2	1	2	1		1
1	1	1	1	1	350	0	#NULL!	0	#NULL!	1	0	3	1	3	0	0	1	1	2	2	2	2	2	2		#NULL!	#NULL!	#NULL!	#NULL!	#NULL!	#NULL!		1	1	1	2	1	2	1	2	#NULL!	1	2	1	1	2	1		1
1	1	1	1	4	483	1	2	1	2	1	0	3	1	3	0	0	1	2	1	2	2	2	2	2		#NULL!	#NULL!	#NULL!	#NULL!	#NULL!	#NULL!		1	1	1	2	1	2	1	1	#NULL!	1	2	1	1	2	1		1
1	1	1	1	1	1000	0	#NULL!	0	#NULL!	1	0	3	1	2	0	0	1	2	1	2	2	2	2	2		#NULL!	#NULL!	#NULL!	#NULL!	#NULL!	#NULL!		1	1	1	1	1	2	1	2	#NULL!	1	2	2	1	2	1		2
1	1	1	1	1	533	0	#NULL!	1	2	1	0	2	1	2	0	0	1	1	2	2	2	2	2	2		#NULL!	#NULL!	#NULL!	#NULL!	#NULL!	#NULL!		1	1	1	3	1	1	1	1	#NULL!	1	1	1	1	2	1		1
1	1	1	1	3	1100	1	1	1	1	1	1	1	1	#NULL!	#NULL!	#NULL!	#NULL!	#NULL!	#NULL!	#NULL!	#NULL!	#NULL!	#NULL!	#NULL!		#NULL!	#NULL!	#NULL!	#NULL!	#NULL!	#NULL!		#NULL!	1	1	2	2	2	1	2	#NULL!	1	1	1	1	2	1		2
1	1	1	1	4	500	1	1	1	1	1	0	3	1	2	0	0	1	2	1	2	2	2	2	2		#NULL!	#NULL!	#NULL!	#NULL!	#NULL!	#NULL!		1	2	#NULL!	#NULL!	#NULL!	#NULL!	#NULL!	#NULL!	#NULL!	#NULL!	#NULL!	#NULL!	#NULL!	#NULL!	#NULL!		2
1	1	1	1	3	800	1	2	1	2	1	1	2	1	1	0	0	2	#NULL!	#NULL!	#NULL!	#NULL!	#NULL!	#NULL!	#NULL!		2	1	2	2	2	2		2	1	1	2	1	2	1	2	#NULL!	1	1	2	1	2	1		1
2	1	1	1	1	600	0	#NULL!	0	#NULL!	1	1	1	1	#NULL!	#NULL!	#NULL!	#NULL!	#NULL!	#NULL!	#NULL!	#NULL!	#NULL!	#NULL!	#NULL!		#NULL!	#NULL!	#NULL!	#NULL!	#NULL!	#NULL!		#NULL!	1	1	1	2	2	1	2	#NULL!	1	2	2	1	2	1		2
1	1	1	1	3	900	1	2	1	2	1	0	2	1	2	0	0	2	#NULL!	#NULL!	#NULL!	#NULL!	#NULL!	#NULL!	#NULL!		2	1	2	2	2	2		2	1	1	2	1	1	1	2	#NULL!	1	1	2	1	2	1		1
1	1	1	1	1	300	0	#NULL!	0	#NULL!	1	1	1	1	#NULL!	#NULL!	#NULL!	#NULL!	#NULL!	#NULL!	#NULL!	#NULL!	#NULL!	#NULL!	#NULL!		#NULL!	#NULL!	#NULL!	#NULL!	#NULL!	#NULL!		#NULL!	1	1	1	1	2	1	2	#NULL!	1	1	2	1	2	1		1
1	1	1	1	3	600	1	3	1	3	1	1	2	1	2	0	0	1	2	2	2	1	2	2	2		#NULL!	#NULL!	#NULL!	#NULL!	#NULL!	#NULL!		1	1	1	2	1	2	1	2	#NULL!	1	2	2	1	2	1		1
1	1	1	1	3	700	1	2	1	2	1	0	1	1	#NULL!	#NULL!	#NULL!	#NULL!	#NULL!	#NULL!	#NULL!	#NULL!	#NULL!	#NULL!	#NULL!		#NULL!	#NULL!	#NULL!	#NULL!	#NULL!	#NULL!		#NULL!	1	1	1	1	2	1	2	#NULL!	1	1	1	1	2	2		1
1	1	1	4	3	1000	1	1	1	1	1	1	1	1	#NULL!	#NULL!	#NULL!	#NULL!	#NULL!	#NULL!	#NULL!	#NULL!	#NULL!	#NULL!	#NULL!		#NULL!	#NULL!	#NULL!	#NULL!	#NULL!	#NULL!		1	1	1	1	2	2	1	2	#NULL!	2	#NULL!	#NULL!	#NULL!	#NULL!	#NULL!		2
2	1	1	1	3	800	1	2	1	2	1	0	2	1	2	0	0	1	1	2	2	2	2	2	2		#NULL!	#NULL!	#NULL!	#NULL!	#NULL!	#NULL!		1	1	1	1	1	2	1	2	#NULL!	1	2	1	1	2	1		1
[truncated: 135 more columns]
